# Supplementary material for: Lineage priming and cell type proportioning depends on the interplay between stochastic and deterministic factors
Source: eLife. 2026 May 19;14:RP105512. doi: 10.7554/eLife.105512 (PMC13186565; doi:10.7554/eLife.105512)
Supplement: Supplementary file 1. [file elife-105512-supp1.xlsx]

## Sheet: Data from Gruenheit et al 2018
Strain	Glucose	Time	raw stalk proportion	Adjusted stalk prop.	Adjusted stalk prop. (outlier removed)
AX3	G-	0	0.837838	0.758506	0.765944
AX3	G-	1	0.650794	0.571462	0.578899
AX3	G-	2	0.571429	0.492097	0.499534
AX3	G-	3	0.294118	0.214786	0.222223
AX3	G-	4	0.225806	0.146474	0.153912
AX3	G-	5	0.0833333	0.00400128	0.0114392
AX3	G+	0	0.779412	0.731809	0.739247
AX3	G+	1	0.707692	0.66009	0.667528
AX3	G+	2	0.5	0.452397	0.459835
AX3	G+	3	0.181818	0.134216	0.141653
AX3	G+	4	0.184615	0.137013	0.144451
AX3	G+	5	0.119403	0.0718004	0.0792383
gef E knockout	G-	0	0.628866	0.67075	0.648436
gef E knockout	G-	1	0.552941	0.594825	0.572511
gef E knockout	G-	2	0.266667	0.30855	0.286237
gef E knockout	G-	3	0.2	0.241884	0.21957
gef E knockout	G-	4	0.113636	0.15552	0.133206
gef E knockout	G-	5	0.173913	0.215797
gef E knockout	G+	0	0.534884	0.619935	0.627373
gef E knockout	G+	1	0.434343	0.519394	0.526832
gef E knockout	G+	2	0.386364	0.471415	0.478852
gef E knockout	G+	3	0.159091	0.244142	0.25158
gef E knockout	G+	4	0.0909091	0.17596	0.183398
gef E knockout	G+	5	0.0714286	0.15648	0.163917

## Sheet: Model fitting comparisons
Using data censored for the outlier					Using uncensored data (outlier included)
Model	Parameter	Value			Model	Parameter	Value
Stochastic-deterministic	AIC	-56.3667			Stochastic-deterministic	AIC	-57.4681
	No of parameters	2				No of parameters	2
	Error SS	0.0894886				Error SS	0.0998257
	Total SS	1.23294				Total SS	1.2595
	Model SS	1.14345				Model SS	1.15967
	R-squared	0.927419				R-squared	0.920742
	Adjusted R-squared	0.92016				Adjusted R-squared	0.912816
Exponential decay	AIC	-47.1916			Exponential decay	AIC	-50.6062
(model presented in Gruenheit	No of parameters	2			(model presented in Gruenheit	No of parameters	2
et al. 2018)	Error SS	0.132778			et al. 2018)	Error SS	0.132866
	Total SS	1.23294				Total SS	1.2595
	Model SS	1.10016				Model SS	1.12663
	R-squared	0.892308				R-squared	-0.117932
	Adjusted R-squared	0.881539				Adjusted R-squared	-0.124724
Akaike weights**	delta	9.1751			Akaike weights**	delta	6.8619
(comparison to S-D model)	Rel likelihood	0.0101778			(comparison to S-D model)	Rel likelihood	0.0323562
	wi(1)	0.0100752				wi(1)	0.0313421
	wi(2)	0.989925				wi(2)	0.968658
	Ratio	98.2534				Ratio	30.906
					[Comparison to the exponential decay model is included as an example
S-D with gamma distr noise	AIC	-51.5989			other model comparisons similarly demonstrate that results do
(Gaussian varation in CCIF	No of parameters	4			not change when the outlier is removed]
replaced by gamma distributed	Error SS	0.0909234
variation)	Total SS	1.23294			** definitions of parameters for comparisons based on Akaike weights
	Model SS	1.14202			delta	Difference in AIC with respect to the best fit model (the S-D model in all cases)
	R-squared	0.926255			Rel likelihood	Relative likelihood of the model, calculated as exp[-delta/2]
	Adjusted R-squared	0.909867			wi(1)	Normalized likelihood for this model (relative likelihood divided by sum of likelihoods for the two models)
Akaike weights**	delta	4.7678			wi(2)	Normalized likelihood for the S-D model (relative likelihood divided by sum of likelihoods for the two models)
(comparison to S-D model)	Rel likelihood	0.0921903			Ratio	wi(2) / wi(1)
	wi(1)	0.0844087
	wi(2)	0.915591
	Ratio	10.8471
S-D with exponential decay	AIC	-54.2375
(linear decay component	No of parameters	3
replaced by exponential decay)	Error SS	0.0891275
	Total SS	1.23294
	Model SS	1.14381
	R-squared	0.927711
	Adjusted R-squared	0.916297
Akaike weights**	delta	2.1292
(comparison to S-D model)	Rel likelihood	0.344866
	wi(1)	0.256431
	wi(2)	0.743569
	Ratio	2.89968
S-D with quadratic decay	AIC	-54.2534
(linear decay component	No of parameters	3
replaced by a quadratic	Error SS	0.0890658
decay function)	Total SS	1.23294
	Model SS	1.14387
	R-squared	0.927761
	Adjusted R-squared	0.916355
Akaike weights**	delta	2.1133
(comparison to S-D model)	Rel likelihood	0.347618
	wi(1)	0.25795
	wi(2)	0.74205
	Ratio	2.87672
S-D with cubic decay	AIC	-54.6443
(linear decay component	No of parameters	4
replaced by a cubic	Error SS	0.0796473
decay function)	Total SS	1.23294
	Model SS	1.15329
	R-squared	0.935401
	Adjusted R-squared	0.921045
Akaike weights**	delta	1.7224
(comparison to S-D model)	Rel likelihood	0.422655
	wi(1)	0.297089
	wi(2)	0.702911
	Ratio	2.366

## Sheet: Unique_Insertions_315
chr_pos	gene	bin	start134	DI_r2_meanread	DI_r6_meanread	brcampmeanread	r3_meanread	r6_meanread	DI_r2_logFoldChange	DI_r6_logFoldChange	BrCamp_logFoldChange	growthR3_logFoldChange	growthR6_logFoldChange	DI_r2_ZScoreOfLogFoldChange	DI_r6_ZScoreOfLogFoldChange	BrCamp_ZScoreOfLogFoldChange	growthR3_ZScoreOfLogFoldChange	growthR6_ZScoreOfLogFoldChange	DI_r2_phenotype	DI_r6_phenotype	BrCamp_phenotype	growthR3_phenotype	growthR6_phenotype
DDB0232428_2277	DDB_G0267178	100	16.7955	115.054	1	18.9179	28.9346	16.8544	0.83571	-1.22519	0.0516801	0.236226	0.00152171	1.58265	-0.367882	0.538498	0.534718	0.655931	1	0	0	0	0
DDB0232428_10064	DDB_G0267188	100	84.6572	87.2813	140.876	60.8481	115.014	148.1	0.0132574	0.221173	-0.143417	0.133088	0.242893	0.62328	1.66541	0.307047	0.389462	0.948428	0	1	0	0	0
DDB0232428_250991	DDB_G0267506	100	16.6907	190.427	1	20.785	50.634	16.4192	1.05725	-1.22248	0.0952751	0.481967	-0.00712429	1.84107	-0.364063	0.590216	0.880812	0.645454	1	0	0	0	0
DDB0232428_272278	DDB_G0267524	100	10.9113	165.575	4.35034	55.8597	75.5703	140.936	1.18112	-0.399352	0.709223	0.840476	1.11115	1.98556	0.793079	1.31857	1.38572	2.00059	1	0	0	0	1
DDB0232428_336418	DDB_G0267560	100	14.2472	126.431	1	30.236	38.7878	13.9409	0.948124	-1.15373	0.326795	0.434966	-0.00944055	1.71378	-0.267421	0.864876	0.814617	0.642647	1	0	0	0	0
DDB0232428_405687	DDB_G0267602	100	23.5955	189.259	1	1	3.6935	44.3072	0.904229	-1.37283	-1.37283	-0.80539	0.273646	1.66257	-0.575428	-1.15145	-0.932259	0.985695	1	0	0	0	0
DDB0232428_567419	DDB_G0267686	100	28.3759	167.203	1	23.7817	13.5881	47.2111	0.770294	-1.45295	-0.0767068	-0.31979	0.221095	1.50634	-0.688062	0.386188	-0.248356	0.922013	1	0	0	0	0
DDB0232428_824060	no_geneID	100	4.6629	139.177	1	84.5725	64.2653	59.9052	1.47491	-0.668656	1.25857	1.13932	1.10881	2.32826	0.414492	1.97028	1.80661	1.99776	1	0	0	0	0
DDB0232428_850496	DDB_G0267784	100	1	347.433	1	107.682	124.106	1	2.54087	0	2.03214	2.09379	0	3.57167	1.35449	2.888	3.15085	0.654087	1	0	0	1	0
DDB0232428_1013739	DDB_G0267872	100	67.279	1315.02	6871.76	23.8018	7.56758	102.551	1.29105	2.00919	-0.451269	-0.948922	0.18306	2.1138	4.17899	-0.0581695	-1.1344	0.875922	1	1	0	0	0
DDB0232428_1104665	DDB_G0268386	100	17.4512	134.38	1	43.6057	13.2035	1	0.886507	-1.24183	0.397717	-0.121136	-1.24183	1.6419	-0.391266	0.949014	0.031422	-0.850774	1	0	0	0	0
DDB0232428_1106779	DDB_G0267910	100	16.5476	134.154	1	1	39.5026	1.41265	0.908871	-1.21873	-1.21873	0.377892	-1.0687	1.66799	-0.358803	-0.968642	0.734236	-0.640976	1	0	0	0	0
DDB0232428_1279136	DDB_G0268002	100	1	101.397	1	1	14.2687	1	2.00603	0	0	1.15438	0	2.94779	1.35449	0.477188	1.82782	0.654087	1	0	0	0	0
DDB0232428_1528596	DDB_G0268138	100	6.51976	105.959	1	1	35.4348	1	1.21091	-0.814232	-0.814232	0.735198	-0.814232	2.02031	0.209844	-0.488766	1.23745	-0.332609	1	0	0	0	0
DDB0232428_1535837	DDB_G0268144	100	16.6461	201.218	1	14.8088	41.4904	1	1.08235	-1.22131	-0.0507918	0.396635	-1.22131	1.87035	-0.362428	0.416932	0.760633	-0.825915	1	0	0	0	0
DDB0232428_1555958	no_geneID	100	8.32276	120.47	129.596	50.0615	10.6375	61.6594	1.16061	1.19233	0.779236	0.106571	0.869732	1.96164	3.03065	1.40163	0.352117	1.70804	1	1	0	0	0
DDB0232428_1743948	DDB_G0267376	100	80.1278	701.818	1	2.57158	35.8518	278.406	0.942441	-1.90378	-1.49358	-0.349273	0.540894	1.70715	-1.32184	-1.29471	-0.289878	1.30955	1	0	0	0	0
DDB0232428_2590865	DDB_G0270856	100	10.7776	126.566	1	1	102.625	4.73138	1.0698	-1.03252	-1.03252	0.978731	-0.357535	1.8557	-0.097028	-0.747732	1.58044	0.220822	1	0	0	1	0
DDB0232428_2794813	DDB_G0269448	100	1	1	100.543	1.20355	66.0097	1	0	2.00235	0.0804656	1.81961	0	0.607816	4.16938	0.572647	2.7647	0.654087	0	1	0	0	0
DDB0232428_2877923	no_geneID	100	6.37252	230.589	1	100.581	86.7282	1	1.55853	-0.804312	1.1982	1.13385	-0.804312	2.4258	0.223789	1.89866	1.7989	-0.320588	1	0	0	0	0
DDB0232428_3108682	DDB_G0270892	100	36.2083	276.1	1	1	44.2095	6.47371	0.882258	-1.55881	-1.55881	0.0867071	-0.747655	1.63695	-0.836877	-1.37208	0.324141	-0.25193	1	0	0	0	0
DDB0232428_3203175	DDB_G0269636	100	4.24618	284.98	1	27.7004	60.9484	1	1.82682	-0.627999	0.814487	1.15696	-0.627999	2.73875	0.471649	1.44344	1.83145	-0.10693	1	0	0	0	0
DDB0232428_3203193	DDB_G0269636	100	1	108.321	1	1	1	1	2.03471	0	0	0	0	2.98126	1.35449	0.477188	0.202026	0.654087	1	0	0	0	0
DDB0232428_3599691	DDB_G0270962	100	6.2443	125.146	1	1	8.09111	1	1.30193	-0.795484	-0.795484	0.112524	-0.795484	2.12649	0.236199	-0.466524	0.360501	-0.30989	1	0	0	0	0
DDB0232428_3913398	DDB_G0269944	100	24.401	354.398	1	65.6693	127.635	50.115	1.16208	-1.38741	0.429954	0.71856	0.312559	1.96335	-0.595924	0.987258	1.21402	1.03285	1	0	0	0	0
DDB0232428_4418525	no_geneID	100	28.702	248.002	387.31	147.903	48.9327	1	0.936542	1.13015	0.712063	0.231687	-1.45791	1.70027	2.94324	1.32193	0.528325	-1.11263	1	1	0	0	0
DDB0232428_4500886	DDB_G0270766	100	38.99	307.067	1	335.657	443.866	141.723	0.896279	-1.59095	0.934942	1.0563	0.560487	1.6533	-0.882067	1.58634	1.68968	1.33329	1	0	0	1	0
DDB0232428_4622401	DDB_G0270774	100	16.9508	105.026	1	1	64.655	6.55668	0.792106	-1.22919	-1.22919	0.581412	-0.412506	1.53179	-0.373502	-0.981046	1.02087	0.154207	1	0	0	0	0
DDB0232428_4788634	DDB_G0270404	100	1	118.523	1	1	1	1	2.0738	0	0	0	0	3.02685	1.35449	0.477188	0.202026	0.654087	1	0	0	0	0
DDB0232429_24391	no_geneID	100	1	100.506	1	5.80177	1	1	2.00219	0	0.76356	0	0	2.94332	1.35449	1.38303	0.202026	0.654087	1	0	0	0	0
DDB0232429_107525	DDB_G0271320	100	18.5083	124.111	1	1	48.2411	1	0.826446	-1.26737	-1.26737	0.416051	-1.26737	1.57184	-0.427169	-1.02634	0.787978	-0.881723	1	0	0	0	0
DDB0232429_263711	DDB_G0271226	100	37.0544	372.051	193.185	3.49665	288.05	564.657	1.00176	0.717134	-1.02519	0.890628	1.18295	1.77635	2.36263	-0.73903	1.45636	2.0876	1	1	0	0	1
DDB0232429_292762	no_geneID	100	16.1638	106.498	1	55.3618	30.6027	1	0.818799	-1.20854	0.534667	0.277217	-1.20854	1.56292	-0.344476	1.11148	0.592448	-0.81044	1	0	0	0	0
DDB0232429_475686	DDB_G0271606	100	21.2734	244.8	1	8.62996	36.2706	359.835	1.06098	-1.32784	-0.391828	0.231718	1.22827	1.84542	-0.512178	0.012348	0.528369	2.14252	1	0	0	0	1
DDB0232429_639058	DDB_G0271552	100	17.1936	100.824	1	36.4594	1	1	0.768196	-1.23537	0.326443	-1.23537	-1.23537	1.5039	-0.382186	0.864459	-1.53782	-0.842946	1	0	0	0	0
DDB0232429_678560	DDB_G0271504	100	7.25897	174.891	1	1	12.2901	1	1.38189	-0.860875	-0.860875	0.228679	-0.860875	2.21976	0.144273	-0.5441	0.52409	-0.389132	1	0	0	0	0
DDB0232429_979009	DDB_G0271870	100	7.59828	132.284	79.4882	1	9.61843	1	1.24079	1.01959	-0.880715	0.102389	-0.880715	2.05517	2.78781	-0.567638	0.346227	-0.413175	1	0	0	0	0
DDB0232429_1059926	DDB_G0271904	100	8.9967	107.189	1	70.1145	8.82404	1	1.07607	-0.954083	0.891725	-0.00841581	-0.954083	1.86302	0.013241	1.53507	0.190173	-0.502083	1	0	0	0	0
DDB0232429_1199978	DDB_G0272088	100	6.22293	165.021	1	37.5929	29.765	1	1.42354	-0.793995	0.781111	0.679711	-0.793995	2.26834	0.238292	1.40385	1.15931	-0.308086	1	0	0	0	0
DDB0232429_1318787	DDB_G0272364	100	11.3521	165.887	1	1	9.50463	1	1.16474	-1.05508	-1.05508	-0.077141	-1.05508	1.96645	-0.128734	-0.774488	0.0933829	-0.624467	1	0	0	0	0
DDB0232429_2046810	DDB_G0272674	100	19.0755	270.105	1	74.7409	1	1	1.15106	-1.28048	0.593083	-1.28048	-1.28048	1.95049	-0.445598	1.18078	-1.60135	-0.897609	1	0	0	0	0
DDB0232429_3051513	DDB_G0273583	100	45.1635	328.523	1	183.454	79.2024	1	0.861779	-1.65479	0.608741	0.243951	-1.65479	1.61306	-0.971804	1.19936	0.545598	-1.35121	1	0	0	0	0
DDB0232429_3226823	DDB_G0273647	100	9.15066	107.982	1	1.34036	13.817	1	1.0719	-0.961452	-0.834232	0.178963	-0.961452	1.85816	0.00288192	-0.512493	0.454071	-0.511013	1	0	0	0	0
DDB0232429_3227213	DDB_G0273647	100	7.89082	187.964	1	1	16.834	74.7499	1.37695	-0.897122	-0.897122	0.329064	0.976488	2.21399	0.0933168	-0.587102	0.665469	1.83741	1	0	0	0	0
DDB0232429_3320222	DDB_G0273719	100	5.59251	126.111	1	191.105	45.1567	1	1.35315	-0.747607	1.53366	0.907115	-0.747607	2.18622	0.303505	2.29663	1.47958	-0.251872	1	0	0	0	0
DDB0232429_3400332	DDB_G0273781	100	1	161.584	1	1	44.5769	37.8357	2.2084	0	0	1.64911	1.5779	3.18385	1.35449	0.477188	2.52458	2.56621	1	0	0	0	0
DDB0232429_3490957	DDB_G0273857	100	5.29333	240.719	1	4.87972	67.567	1025.33	1.65778	-0.723729	-0.0353335	1.10601	2.28714	2.54157	0.337072	0.43527	1.75969	3.42567	1	0	0	0	1
DDB0232429_3571948	DDB_G0273935	100	24.051	258.54	76.9648	41.5311	106.22	45.1985	1.03139	0.50516	0.237241	0.645074	0.273992	1.81091	2.06463	0.758635	1.11053	0.986114	1	0	0	0	0
DDB0232429_4533421	no_geneID	100	89.8155	29.1869	114.689	1	28.875	1	-0.488163	0.106171	-1.95335	-0.492829	-1.95335	0.0383867	1.50374	-1.84015	-0.492058	-1.71301	0	1	0	0	0
DDB0232429_4574677	DDB_G0274451	100	1	152.339	1	1	8.61463	1	2.18281	0	0	0.935237	0	3.15401	1.35449	0.477188	1.51918	0.654087	1	0	0	0	0
DDB0232429_4637173	no_geneID	100	58.605	1	104.886	1	93.4506	48.2992	-1.76793	0.252782	-1.76793	0.202648	-0.0839947	-1.45443	1.70984	-1.62018	0.487428	0.552301	0	1	0	0	0
DDB0232429_4877082	DDB_G0274385	100	13.3217	174.478	1	1	237.289	16.264	1.11718	-1.12456	-1.12456	1.25072	0.0866661	1.91098	-0.226414	-0.85692	1.96349	0.75911	1	0	0	1	0
DDB0232429_5065682	DDB_G0275103	100	12.602	110.746	1	1	34.8432	1	0.943892	-1.10044	-1.10044	0.44168	-1.10044	1.70884	-0.192503	-0.828303	0.824074	-0.679437	1	0	0	0	0
DDB0232429_5073852	DDB_G0275171	100	32.2158	234.31	1	170.103	23.0173	77.9575	0.861722	-1.50807	0.722644	-0.146015	0.383789	1.61299	-0.765547	1.33449	-0.00361646	1.11917	1	0	0	0	0
DDB0232429_5261759	DDB_G0275155	100	5.67799	150.48	1	94.913	1	1	1.42328	-0.754195	1.22313	-0.754195	-0.754195	2.26804	0.294243	1.92823	-0.860157	-0.259855	1	0	0	0	0
DDB0232429_5499907	DDB_G0275391	100	7.37693	113.3	1	23.3207	17.1687	1	1.18635	-0.867875	0.499865	0.366863	-0.867875	1.99166	0.134432	1.0702	0.718703	-0.397615	1	0	0	0	0
DDB0232429_5697843	DDB_G0275855	100	21.5881	252.168	1	49.9051	79.0566	23.0674	1.06748	-1.33422	0.36393	0.563723	0.0287825	1.853	-0.521146	0.908931	0.995954	0.688966	1	0	0	0	0
DDB0232429_5707101	no_geneID	100	62.4284	270.562	134.062	1	14.9533	42.8968	0.636885	0.331924	-1.79538	-0.620646	-0.162958	1.35073	1.8211	-1.65274	-0.672071	0.456613	0	1	0	0	0
DDB0232429_6286620	DDB_G0276155	100	31.3711	178.688	112.876	1	43.0585	352.363	0.755565	0.556073	-1.49653	0.137529	1.05046	1.48916	2.13621	-1.2982	0.395716	1.92705	0	1	0	0	1
DDB0232429_6314962	DDB_G0276027	100	28.3584	254.91	1	1	162.751	54.2273	0.953706	-1.45268	-1.45268	0.758842	0.281537	1.72029	-0.687685	-1.24618	1.27075	0.995257	1	0	0	0	0
DDB0232429_6449707	DDB_G0276067	100	32.5465	249.066	1	52.3651	21.7876	177.558	0.883809	-1.5125	0.206538	-0.174294	0.736836	1.63876	-0.771784	0.722211	-0.0434447	1.547	1	0	0	0	1
DDB0232429_6538917	DDB_G0276037	100	9.29831	107.113	1	1	32.9585	1	1.06144	-0.968404	-0.968404	0.549564	-0.968404	1.84595	-0.00689071	-0.671666	0.976013	-0.519437	1	0	0	0	0
DDB0232429_7030196	no_geneID	100	1	100.263	1	1	21.0745	1	2.00114	0	0	1.32376	0	2.94209	1.35449	0.477188	2.06636	0.654087	1	0	0	0	0
DDB0232429_7082573	DDB_G0276657	100	27.4204	319.938	1	289.903	63.0089	236.381	1.06699	-1.43807	1.02418	0.361327	0.935539	1.85243	-0.66715	1.69221	0.710907	1.78779	1	0	0	0	1
DDB0232429_7237350	DDB_G0294921	100	1	111.657	1	1	46.7574	1	2.04789	0	0	1.66985	0	2.99662	1.35449	0.477188	2.55379	0.654087	1	0	0	0	0
DDB0232429_7336829	DDB_G0276887	100	13.1969	159.447	1	1	35.8903	1	1.08214	-1.12047	-1.12047	0.434505	-1.12047	1.87011	-0.220666	-0.85207	0.813968	-0.703715	1	0	0	0	0
DDB0232429_7402886	DDB_G0276823	100	16.5142	147.375	1	86.1074	66.7085	39.7814	0.950566	-1.21786	0.717183	0.606324	0.381823	1.71663	-0.357571	1.32801	1.05595	1.11679	1	0	0	0	0
DDB0232429_7465429	DDB_G0276841	100	25.6015	151.374	43.0573	131.736	11.6512	81.2281	0.771787	0.225782	0.711438	-0.341894	0.501441	1.50808	1.67189	1.32119	-0.279486	1.26174	1	0	0	0	0
DDB0232429_7527114	DDB_G0276865	100	6.32535	170.576	1	1	23.7445	45.6347	1.43083	-0.801084	-0.801084	0.574479	0.858211	2.27684	0.228326	-0.473168	1.0111	1.69408	1	0	0	0	0
DDB0232429_7620848	DDB_G0277301	100	17.9348	133.944	1	52.3089	12.4887	14.3557	0.873226	-1.2537	0.464879	-0.157179	-0.0966727	1.62641	-0.407954	1.02869	-0.01934	0.536938	1	0	0	0	0
DDB0232429_7644438	DDB_G0277145	100	13.4877	248.306	47.1633	728.846	82.0719	503.155	1.26505	0.543665	1.7327	0.784256	1.57176	2.08346	2.11877	2.53275	1.30655	2.55877	1	0	0	0	1
DDB0232429_7662643	DDB_G0277219	100	1	150.858	1	1	6.42408	1	2.17857	0	0	0.807811	0	3.14906	1.35449	0.477188	1.33972	0.654087	1	0	0	0	0
DDB0232429_7688334	DDB_G0277177	100	5.83827	107.871	1	1	10.7806	1	1.26662	-0.766284	-0.766284	0.266359	-0.766284	2.08529	0.277248	-0.431884	0.577156	-0.274505	1	0	0	0	0
DDB0232429_7730980	DDB_G0277193	100	19.876	256.252	1	78.6276	46.4787	1	1.11034	-1.29833	0.597246	0.368925	-1.29833	1.90299	-0.470698	1.18572	0.721607	-0.919245	1	0	0	0	0
DDB0232429_8011924	DDB_G0277539	100	89.1785	619.499	1	10779.1	2280.65	2952.77	0.841781	-1.95026	2.08232	1.4078	1.51997	1.58973	-1.38718	2.94752	2.18472	2.49601	1	0	0	1	1
DDB0232429_8257254	DDB_G0277661	100	5.13329	127.934	1	174.923	36.7279	1	1.39659	-0.710396	1.53245	0.8546	-0.710396	2.2369	0.355815	2.29519	1.40562	-0.206779	1	0	0	0	0
DDB0232430_244178	DDB_G0278079	100	12.7596	143.368	78.9014	185.362	57.2078	1	1.05062	0.791248	1.16218	0.651619	-1.10584	1.83333	2.46682	1.85593	1.11974	-0.68598	1	0	0	0	0
DDB0232430_270828	DDB_G0278099	100	37.0777	80.9355	137.309	1	39.0166	39.4951	0.339026	0.568585	-1.56911	0.0221364	0.0274297	1.00328	2.1538	-1.38431	0.233202	0.687327	0	1	0	0	0
DDB0232430_562831	DDB_G0277853	100	1	168.135	1	93.1634	18.4756	1	2.22566	0	1.96925	1.2666	0	3.20399	1.35449	2.81338	1.98586	0.654087	1	0	0	0	0
DDB0232430_681938	DDB_G0278657	100	43.2931	69.1518	129.381	5.11023	255.094	36.992	0.203385	0.475451	-0.927978	0.770281	-0.0683116	0.845059	2.02287	-0.623707	1.28686	0.571306	0	1	0	0	0
DDB0232430_750360	DDB_G0278359	100	50.3499	574.547	86.9748	93.1563	218.803	330.217	1.05733	0.237394	0.267213	0.638055	0.8168	1.84116	1.68821	0.794193	1.10064	1.6439	1	0	0	0	1
DDB0232430_818179	DDB_G0278393	100	15.2839	374.71	1	7.90686	35.1712	1	1.38946	-1.18423	-0.286231	0.361952	-1.18423	2.22858	-0.310304	0.137622	0.711787	-0.780984	1	0	0	0	0
DDB0232430_907607	DDB_G0278457	100	8.74462	186.86	1	1	18.0135	1	1.32977	-0.941741	-0.941741	0.313857	-0.941741	2.15896	0.0305918	-0.640035	0.644051	-0.487127	1	0	0	0	0
DDB0232430_965656	DDB_G0278491	100	15.2873	103.366	1	1	1	1	0.830045	-1.18433	-1.18433	-1.18433	-1.18433	1.57604	-0.31044	-0.927829	-1.46595	-0.781101	1	0	0	0	0
DDB0232430_987722	DDB_G0278509	100	1.74519	143.592	1	1	80.9416	72.0186	1.91529	-0.241842	-0.241842	1.66633	1.6156	2.84195	1.01451	0.190282	2.54883	2.6119	1	0	0	0	0
DDB0232430_1004940	DDB_G0278699	100	31.2466	399.568	1	24.9342	44.6399	33.5214	1.10679	-1.4948	-0.0980062	0.154921	0.0305192	1.89886	-0.746898	0.360919	0.420211	0.691071	1	0	0	0	0
DDB0232430_1006666	DDB_G0277843	100	6.35115	101.226	290.457	32.5411	104.67	81.293	1.20244	1.66023	0.70958	1.21697	1.1072	2.01043	3.68842	1.31899	1.91596	1.99581	1	1	0	1	0
DDB0232430_1105973	no_geneID	100	65.9846	7.00553	177.323	17.7884	45.1405	1	-0.974002	0.429321	-0.569306	-0.164877	-1.81944	-0.528331	1.95802	-0.198202	-0.0301811	-1.55074	0	1	0	0	0
DDB0232430_1129676	DDB_G0278759	100	20.7318	186.538	1	1	1.83152	55.0931	0.954132	-1.31664	-1.31664	-1.05382	0.424461	1.72078	-0.496433	-1.08479	-1.28214	1.16845	1	0	0	0	0
DDB0232430_1295570	DDB_G0278859	100	7.61794	125.185	1	42.7132	8.19581	1	1.21571	-0.881838	0.748725	0.0317546	-0.881838	2.02591	0.114804	1.36543	0.246748	-0.414535	1	0	0	0	0
DDB0232430_1525378	DDB_G0279021	100	26.6921	176.369	1	1	4.47879	1	0.82004	-1.42638	-1.42638	-0.775222	-1.42638	1.56437	-0.650714	-1.21498	-0.889771	-1.07442	1	0	0	0	0
DDB0232430_1657351	DDB_G0279117	100	1	100.7	1	1	5.8923	1	2.00303	0	0	0.770285	0	2.9443	1.35449	0.477188	1.28687	0.654087	1	0	0	0	0
DDB0232430_1808254	no_geneID	100	94.8661	226.689	127.748	243.229	50.3659	1	0.37832	0.129244	0.408904	-0.274975	-1.97711	1.04912	1.53617	0.962286	-0.185239	-1.7418	0	1	0	0	0
DDB0232430_1984944	DDB_G0279359	100	11.8627	123.429	1	1	10.6058	1	1.01723	-1.07418	-1.07418	-0.0486418	-1.07418	1.79439	-0.155596	-0.797157	0.13352	-0.647623	1	0	0	0	0
DDB0232430_2026915	DDB_G0279425	100	15.6811	73.7439	446.105	7.41535	1	1	0.672349	1.45406	-0.325245	-1.19538	-1.19538	1.39209	3.39859	0.091337	-1.4815	-0.794486	0	1	0	0	0
DDB0232430_2029531	DDB_G0279425	100	5.6032	443.339	930.448	1.45762	20.4986	1	1.8983	2.22026	-0.584793	0.563289	-0.748436	2.82213	4.47571	-0.216574	0.995344	-0.252877	1	1	0	0	0
DDB0232430_2104290	DDB_G0279411	100	51.9351	418.606	1	215.129	58.2971	243.777	0.906344	-1.71546	0.617238	0.0501859	0.671531	1.66504	-1.0571	1.20944	0.272706	1.46786	1	0	0	0	0
DDB0232430_2518248	DDB_G0279789	100	20.7306	168.529	1	1	43.9002	1	0.910064	-1.31661	-1.31661	0.325855	-1.31661	1.66938	-0.496398	-1.08476	0.660949	-0.941399	1	0	0	0	0
DDB0232430_2894508	DDB_G0280073	100	34.0314	373.755	1	1	1	1	1.04071	-1.53188	-1.53188	-1.53188	-1.53188	1.82177	-0.799021	-1.34014	-1.95542	-1.20226	1	0	0	0	0
DDB0232430_3219292	DDB_G0280299	100	8.0488	133.577	1	1	31.0215	1	1.22	-0.905731	-0.905731	0.585931	-0.905731	2.03091	0.0812141	-0.597315	1.02723	-0.44349	1	0	0	0	0
DDB0232430_3556793	DDB_G0294585	100	14.041	109.767	1	1	49.1108	91.0183	0.893075	-1.1474	-1.1474	0.543779	0.811731	1.64956	-0.258519	-0.884013	0.967866	1.63775	1	0	0	0	0
DDB0232430_3885859	DDB_G0280923	100	9.59541	111.845	1	1	16.991	31.6255	1.06655	-0.982064	-0.982064	0.248156	0.517974	1.85192	-0.0260934	-0.687871	0.55152	1.28178	1	0	0	0	0
DDB0232430_3935315	DDB_G0281011	100	9.31264	112.972	1	57.8974	40.3926	5.9759	1.0839	-0.969073	0.793586	0.637229	-0.192669	1.87215	-0.00783108	1.41865	1.09948	0.420608	1	0	0	0	0
DDB0232430_4034984	DDB_G0281087	100	10.3416	134.625	1	23.4241	1	13.443	1.11454	-1.01459	0.355078	-1.01459	0.113912	1.9079	-0.071813	0.89843	-1.22688	0.792127	1	0	0	0	0
DDB0232430_4196858	DDB_G0281203	100	10.193	188.478	1	1	18.6663	1	1.26696	-1.0083	-1.0083	0.262756	-1.0083	2.08569	-0.062979	-0.718998	0.572083	-0.567786	1	0	0	0	0
DDB0232430_4321613	DDB_G0281333	100	16.2927	137.785	1	1	71.3329	1	0.927211	-1.21199	-1.21199	0.641298	-1.21199	1.68938	-0.349325	-0.960644	1.10521	-0.81462	1	0	0	0	0
DDB0232430_4405545	DDB_G0281377	100	24.0438	330.098	1	1	22.4539	14.6372	1.13764	-1.381	-1.381	-0.0297099	-0.215545	1.93484	-0.586919	-1.16115	0.160183	0.392887	1	0	0	0	0
DDB0232430_4512369	DDB_G0295123	100	13.4685	156.011	1	36.2293	47.4359	1	1.06384	-1.12932	0.429742	0.546789	-1.12932	1.84876	-0.233102	0.987007	0.972105	-0.714434	1	0	0	0	0
DDB0232430_4531563	no_geneID	100	19.7806	1	100.895	1	20.2369	134.468	-1.29624	0.707632	-1.29624	0.00990443	0.83238	-0.904212	2.34927	-1.06059	0.215975	1.66278	0	1	0	0	1
DDB0232430_4580180	DDB_G0281481	100	30.7925	615.467	51.3976	33.1074	450.544	3632.86	1.30076	0.222497	0.0314798	1.16529	2.0718	2.12512	1.66727	0.514533	1.84318	3.16473	1	0	0	1	1
DDB0232430_4613025	DDB_G0281493	100	16.9496	126.017	1	1	1	1	0.871268	-1.22916	-1.22916	-1.22916	-1.22916	1.62413	-0.373459	-0.98101	-1.52908	-0.835424	1	0	0	0	0
DDB0232430_4655541	DDB_G0281515	100	7.77592	118.822	1	29.0835	92.9618	2.21945	1.18414	-0.890752	0.572894	1.07755	-0.544507	1.98909	0.102272	1.15683	1.71961	-0.00575313	1	0	0	0	0
DDB0232430_4959006	DDB_G0281545	100	52.2263	537.287	1516.48	109.209	57.6935	219.536	1.01232	1.46295	0.320371	0.0432379	0.623616	1.78866	3.41109	0.857256	0.26292	1.40979	1	1	0	0	0
DDB0232430_5419907	DDB_G0282121	100	18.7349	165.883	1	80.8838	42.8255	80.4523	0.947149	-1.27265	0.63521	0.359051	0.632887	1.71264	-0.4346	1.23076	0.707701	1.42103	1	0	0	0	0
DDB0232430_5587079	DDB_G0282263	100	6.21045	103.384	1	1	1	1	1.22133	-0.793123	-0.793123	-0.793123	-0.793123	2.03247	0.239518	-0.463724	-0.914982	-0.307029	1	0	0	0	0
DDB0232430_5781010	DDB_G0282455	100	17.6953	162.818	1	33.2327	38.4867	1	0.963845	-1.24786	0.273708	0.337453	-1.24786	1.73212	-0.399744	0.801898	0.677284	-0.858082	1	0	0	0	0
DDB0232430_5807547	DDB_G0282469	100	22.7584	191.385	1	1	4.10091	1	0.924767	-1.35714	-1.35714	-0.744261	-1.35714	1.68653	-0.553374	-1.13284	-0.846166	-0.990513	1	0	0	0	0
DDB0232430_5832802	DDB_G0282765	100	15.0611	115.944	1	1	10.3154	1	0.886392	-1.17786	-1.17786	-0.16437	-1.17786	1.64177	-0.301337	-0.920146	-0.0294681	-0.773253	1	0	0	0	0
DDB0232430_5940434	DDB_G0282787	100	1	133.627	1	5.36625	42.1213	46.5113	2.12589	0	0.729671	1.6245	1.66756	3.08761	1.35449	1.34282	2.48992	2.67486	1	0	0	0	0
DDB0232430_5977483	DDB_G0282587	100	6.45461	128.509	1	1	1	1	1.29906	-0.80987	-0.80987	-0.80987	-0.80987	2.12314	0.215976	-0.483591	-0.938568	-0.327323	1	0	0	0	0
DDB0232430_6018500	DDB_G0282625	100	11.3665	149.15	1	1	59.9986	50.1583	1.118	-1.05563	-1.05563	0.722516	0.644718	1.91193	-0.129506	-0.77514	1.21959	1.43536	1	0	0	0	0
DDB0232430_6185954	no_geneID	100	1	112.541	1	1	1	1	2.05131	0	0	0	0	3.00062	1.35449	0.477188	0.202026	0.654087	1	0	0	0	0
DDB0232431_99538	DDB_G0282981	100	10.2085	100.537	1	66.1958	30.606	1	0.993363	-1.00896	0.811869	0.476845	-1.00896	1.76655	-0.0639059	1.44034	0.873598	-0.568585	1	0	0	0	0
DDB0232431_163274	DDB_G0283015	100	13.4781	270.082	52.1294	1	6.94679	1	1.30187	0.587453	-1.12963	-0.287846	-1.12963	2.12641	2.18032	-0.862934	-0.203366	-0.714813	1	0	0	0	0
DDB0232431_654751	DDB_G0283417	100	35.056	1	106.81	1	90.9995	1	-1.54476	0.483851	-1.54476	0.414276	-1.54476	-1.19411	2.03468	-1.35542	0.785478	-1.21788	0	1	0	0	0
DDB0232431_1147674	no_geneID	100	51.8824	350.484	1	36.0136	77.4573	13.6868	0.829648	-1.71502	-0.158554	0.174042	-0.578719	1.57558	-1.05648	0.289089	0.447141	-0.0472115	1	0	0	0	0
DDB0232431_1190791	DDB_G0283833	100	10.7355	100.318	1	95.5037	1	1	0.970557	-1.03082	0.949197	-1.03082	-1.03082	1.73994	-0.0946395	1.60326	-1.24975	-0.595078	1	0	0	0	0
DDB0232431_1793640	DDB_G0284261	100	24.1775	154.799	1	13.8697	9.87109	1	0.806358	-1.38341	-0.241345	-0.389046	-1.38341	1.54841	-0.590305	0.190872	-0.345893	-1.02235	1	0	0	0	0
DDB0232431_2141245	DDB_G0284537	100	15.9683	157.775	1	1	1	1	0.99478	-1.20326	-1.20326	-1.20326	-1.20326	1.7682	-0.337046	-0.950282	-1.4926	-0.804036	1	0	0	0	0
DDB0232431_2485180	DDB_G0284789	100	13.593	102.001	1	1	13.1169	32.4571	0.875289	-1.13332	-1.13332	-0.015484	0.377994	1.62882	-0.238724	-0.867308	0.180219	1.11214	1	0	0	0	0
DDB0232431_2862340	DDB_G0285109	100	1	123.625	1	1	48.5896	1	2.09211	0	0	1.68654	0	3.0482	1.35449	0.477188	2.5773	0.654087	1	0	0	0	0
DDB0232431_3080238	DDB_G0285309	100	3.27384	170.874	1	1	28.5921	1	1.71762	-0.515057	-0.515057	0.941188	-0.515057	2.61137	0.630421	-0.133844	1.52756	0.0299345	1	0	0	0	0
DDB0232431_3185149	DDB_G0285409	100	33.1137	259.141	1	40.148	78.2958	1	0.893528	-1.52001	0.0836564	0.373731	-1.52001	1.65009	-0.782332	0.576432	0.728375	-1.18788	1	0	0	0	0
DDB0232431_3367814	DDB_G0285751	100	10.5047	128.612	1	1	1	1	1.0879	-1.02138	-1.02138	-1.02138	-1.02138	1.87682	-0.0813708	-0.734519	-1.23646	-0.58364	1	0	0	0	0
DDB0232431_3396996	DDB_G0285577	100	11.3518	102.638	1	6.49331	3.64115	1	0.956244	-1.05506	-0.242599	-0.493826	-1.05506	1.72325	-0.128717	0.189384	-0.493462	-0.624453	1	0	0	0	0
DDB0232431_3409669	DDB_G0285583	100	35.0847	207.746	1	22.1636	53.673	1	0.772414	-1.54512	-0.199477	0.184638	-1.54512	1.50882	-0.817632	0.24054	0.462064	-1.21831	1	0	0	0	0
DDB0232431_3653709	DDB_G0285797	100	1	1	172.229	1.0863	5.47349	154.821	0	2.23611	0.0359478	0.738264	2.18983	0.607816	4.49799	0.519834	1.24177	3.30775	0	1	0	0	1
DDB0232431_4035645	DDB_G0286079	100	1	206.081	1	1	1	1	2.31404	0	0	0	0	3.30708	1.35449	0.477188	0.202026	0.654087	1	0	0	0	0
DDB0232431_4240078	DDB_G0286243	100	24.8623	202.39	1	1	79.0234	29.29	0.910648	-1.39554	-1.39554	0.502214	0.0711772	1.67006	-0.607358	-1.1784	0.909327	0.740341	1	0	0	0	0
DDB0232431_4277214	no_geneID	100	47.2475	291.44	1	103.469	35.696	22.4866	0.790171	-1.67438	0.34043	-0.12176	-0.322456	1.52953	-0.999346	0.881053	0.0305434	0.263331	1	0	0	0	0
DDB0232431_4487317	no_geneID	100	1	117.95	1	1	23.3821	20.8272	2.0717	0	0	1.36888	1.31863	3.0244	1.35449	0.477188	2.12991	2.25202	1	0	0	0	0
DDB0232431_4498780	DDB_G0286437	100	1.27258	114.18	1	1	7.87606	1	1.95291	-0.104684	-0.104684	0.791625	-0.104684	2.88583	1.20732	0.352997	1.31692	0.52723	1	0	0	0	0
DDB0232431_4530116	no_geneID	100	23.532	183.302	2.89658	93.3116	29.5679	44.5747	0.891509	-0.909774	0.598277	0.0991623	0.27743	1.64774	0.0755316	1.18695	0.341683	0.99028	1	0	0	0	0
DDB0232431_4614670	DDB_G0286543	100	20.3767	120.761	1	35.5378	26.8838	1	0.772795	-1.30913	0.241557	0.120358	-1.30913	1.50926	-0.485885	0.763756	0.371534	-0.932337	1	0	0	0	0
DDB0232431_4666454	DDB_G0286789	100	12.6885	109.466	1	1	2.82317	1	0.935867	-1.10341	-1.10341	-0.652675	-1.10341	1.69948	-0.196684	-0.831831	-0.71718	-0.683041	1	0	0	0	0
DDB0232431_4791431	DDB_G0286651	100	94.4892	455.27	334.794	3589.12	1088.83	3254.01	0.682887	0.549396	1.57961	1.06158	1.53704	1.40439	2.12682	2.35113	1.69712	2.51669	0	1	0	1	1
DDB0232431_5088839	DDB_G0286925	100	1	124.587	1	1	4.94996	1	2.09547	0	0	0.694602	0	3.05213	1.35449	0.477188	1.18028	0.654087	1	0	0	0	0
DDB0232431_5191594	DDB_G0287003	100	26.7215	230.27	1	1	26.8316	1	0.935376	-1.42686	-1.42686	0.0017866	-1.42686	1.69891	-0.651386	-1.21555	0.204542	-1.075	1	0	0	0	0
DDB0232431_5206007	DDB_G0287013	100	13.0935	169.047	75.6856	6.95433	10.3946	1	1.11095	0.761958	-0.2748	-0.100246	-1.11705	1.90371	2.42564	0.151183	0.0608423	-0.699574	1	0	0	0	0
DDB0232431_5227643	DDB_G0287047	100	25.8146	229.935	1	1	36.6061	23.072	0.94974	-1.41186	-1.41186	0.151689	-0.0487802	1.71566	-0.630305	-1.19776	0.415659	0.594975	1	0	0	0	0
DDB0232431_5229492	no_geneID	100	5.04757	136.264	1	37.6124	81.0464	1	1.4313	-0.703082	0.872249	1.20565	-0.703082	2.27739	0.366097	1.51197	1.90003	-0.197917	1	0	0	0	0
DDB0232431_5428716	DDB_G0287169	100	61.9853	468.506	1	5088.31	16.1549	1	0.878427	-1.79229	1.91429	-0.583983	-1.79229	1.63248	-1.1651	2.74818	-0.620437	-1.51783	1	0	0	0	0
DDB0232432_20501	no_geneID	100	1	3.20844	110.424	1	1	1	0.506295	2.04306	0	0	0	1.19839	4.22661	0.477188	0.202026	0.654087	0	1	0	0	0
DDB0232432_24396	DDB_G0287229	100	5.34872	134.745	1	1	1	1	1.40126	-0.72825	-0.72825	-0.72825	-0.72825	2.24235	0.330716	-0.386762	-0.823617	-0.228415	1	0	0	0	0
DDB0232432_202383	DDB_G0287365	100	22.3498	821.713	1	178.997	485.118	1898.47	1.56545	-1.34927	0.903572	1.33657	1.92913	2.43387	-0.542315	1.54913	2.08441	2.99183	1	0	0	1	1
DDB0232432_472328	DDB_G0287615	100	2.53656	112.419	1	71.9586	8.03876	1	1.64659	-0.404246	1.45284	0.500943	-0.404246	2.52852	0.786199	2.20074	0.907537	0.164217	1	0	0	0	0
DDB0232432_489962	DDB_G0287625	100	1	111.982	1	1	1	1	2.04915	0	0	0	0	2.99809	1.35449	0.477188	0.202026	0.654087	1	0	0	0	0
DDB0232432_852808	DDB_G0287943	100	3.72261	116.004	1	1	1	13.6919	1.49362	-0.570848	-0.570848	-0.570848	0.565617	2.35009	0.551991	-0.20003	-0.601937	1.33951	1	0	0	0	0
DDB0232432_889854	DDB_G0287957	100	17.8683	175.839	1	1	60.7919	109.769	0.993032	-1.25208	-1.25208	0.531763	0.788396	1.76616	-0.405685	-1.00821	0.950942	1.60948	1	0	0	0	1
DDB0232432_1168465	DDB_G0288161	100	28.4742	275.39	1	5.09264	90.3438	136.26	0.985497	-1.45445	-0.747508	0.501447	0.679919	1.75737	-0.690173	-0.409609	0.908247	1.47802	1	0	0	0	0
DDB0232432_1173191	DDB_G0288165	100	10.9793	135.056	1	1	1	1	1.08994	-1.04057	-1.04057	-1.04057	-1.04057	1.8792	-0.108346	-0.757283	-1.26348	-0.606892	1	0	0	0	0
DDB0232432_1187212	DDB_G0288193	100	1	104.906	1	6.95433	31.9789	1	2.0208	0	0.842255	1.50486	0	2.96503	1.35449	1.47639	2.32143	0.654087	1	0	0	0	0
DDB0232432_1424982	DDB_G0288361	100	15.6061	118.359	1	1	29.9573	1	0.87991	-1.19329	-1.19329	0.283209	-1.19329	1.63421	-0.323038	-0.93846	0.600888	-0.791961	1	0	0	0	0
DDB0232432_1624726	DDB_G0288507	100	40.8965	310.955	1	40.148	22.6974	61.4443	0.881012	-1.61169	-0.00802158	-0.255709	0.176796	1.63549	-0.911212	0.467671	-0.158106	0.868331	1	0	0	0	0
DDB0232432_1637866	DDB_G0288521	100	26.4484	355.068	1	85.4623	43.0011	39.9415	1.12791	-1.4224	0.509376	0.211081	0.179026	1.9235	-0.645114	1.08148	0.499305	0.871033	1	0	0	0	0
DDB0232432_1722468	DDB_G0288587	100	4.95371	102.942	88.2195	26.7783	99.2637	16.0506	1.31766	1.25063	0.732853	1.30186	0.510561	2.14483	3.11262	1.3466	2.03552	1.27279	1	0	0	0	0
DDB0232432_1749865	DDB_G0288619	100	61.0872	305.355	338.759	56.5425	528.703	1995.35	0.698855	0.74394	-0.0335753	0.937261	1.51407	1.42301	2.40031	0.437356	1.52203	2.48886	0	1	0	1	1
DDB0232432_1802058	DDB_G0288673	100	16.5661	368.764	1	93.2847	75.137	143.62	1.34753	-1.21922	0.750589	0.656633	0.937994	2.17967	-0.359488	1.36764	1.12681	1.79076	1	0	0	0	1
DDB0232432_1976564	DDB_G0288795	100	12.9018	105.535	1	9.95098	1	1	0.912745	-1.11065	-0.112786	-1.11065	-1.11065	1.67251	-0.206862	0.343386	-1.36218	-0.691815	1	0	0	0	0
DDB0232432_2045949	DDB_G0288833	100	14.9201	158.877	1	1	160.333	94.8883	1.02729	-1.17377	-1.17377	1.03125	0.803441	1.80612	-0.295594	-0.9153	1.65441	1.62771	1	0	0	1	0
DDB0232432_2259026	DDB_G0289031	100	83.1652	605.454	285.465	340.001	376.872	993.674	0.86214	0.535611	0.611538	0.656252	1.0773	1.61348	2.10744	1.20268	1.12627	1.95958	1	1	0	0	1
DDB0232432_2276316	DDB_G0289051	100	14.6828	123.292	1	113.831	38.5365	7.05449	0.924125	-1.16681	0.88945	0.419063	-0.318345	1.68578	-0.285809	1.53238	0.79222	0.268313	1	0	0	0	0
DDB0232432_2286728	DDB_G0289039	100	14.3681	100.096	1	1	20.1279	1	0.843015	-1.1574	-1.1574	0.146398	-1.1574	1.59117	-0.272581	-0.89588	0.408208	-0.748466	1	0	0	0	0
DDB0232432_2628402	no_geneID	100	37.1629	224.58	1	19.6325	45.0634	1.16375	0.781262	-1.57011	-0.277134	0.0837152	-1.50425	1.51914	-0.852764	0.148413	0.319927	-1.16878	1	0	0	0	0
DDB0232432_2708272	no_geneID	100	17.8192	122.149	1	1	24.0398	35.4271	0.836004	-1.25089	-1.25089	0.130043	0.298449	1.58299	-0.404004	-1.00679	0.385174	1.01575	1	0	0	0	0
DDB0232432_3020799	DDB_G0289609	100	10.0451	1	131.504	1	1	1	-1.00196	1.11698	-1.00196	-1.00196	-1.00196	-0.560939	2.92473	-0.71147	-1.2091	-0.560096	0	1	0	0	0
DDB0232432_3227483	DDB_G0289761	100	33.9215	208.253	64.6065	111.152	65.0337	8.69719	0.788115	0.279801	0.515442	0.282663	-0.591096	1.52713	1.74783	1.08868	0.600119	-0.0622107	1	0	0	0	0
DDB0232432_3338339	DDB_G0289811	100	13.65	101.951	1	82.1404	56.6982	30.794	0.873258	-1.13513	0.779423	0.618436	0.353332	1.62645	-0.241278	1.40185	1.07301	1.08226	1	0	0	0	0
DDB0232432_3380395	DDB_G0289901	100	71.5848	595.563	362.707	223.478	1098.58	2194.22	0.920107	0.704735	0.494414	1.18601	1.48646	1.6811	2.3452	1.06373	1.87236	2.4554	1	1	0	1	1
DDB0232432_3742905	DDB_G0290179	100	47.7146	350.433	178.294	39.3518	24.8963	1.57859	0.865954	0.572487	-0.0836864	-0.282517	-1.48038	1.61793	2.15928	0.377907	-0.195862	-1.13986	1	1	0	0	0
DDB0232432_3906873	DDB_G0290259	100	27.7186	261.946	1	94.6981	26.9904	31.779	0.975441	-1.44277	0.53357	-0.0115627	0.0593692	1.74564	-0.673753	1.11018	0.185741	0.726032	1	0	0	0	0
DDB0232432_4032949	DDB_G0290397	100	1	144.438	1	1	1	1	2.15968	0	0	0	0	3.12703	1.35449	0.477188	0.202026	0.654087	1	0	0	0	0
DDB0232432_4270901	DDB_G0290557	100	15.972	103.814	1	1	49.4388	29.012	0.812899	-1.20336	-1.20336	0.49071	0.259219	1.55604	-0.337188	-0.950401	0.893125	0.968212	1	0	0	0	0
DDB0232432_4423839	no_geneID	100	23.6883	219.094	1	36.8698	105.17	96.4942	0.966096	-1.37453	0.192137	0.647356	0.609967	1.73474	-0.577826	0.705127	1.11374	1.39325	1	0	0	0	0
DDB0232432_4528351	DDB_G0290737	100	5.38949	130.549	1	1	22.5583	1	1.38422	-0.731548	-0.731548	0.621758	-0.731548	2.22248	0.32608	-0.390675	1.07769	-0.232412	1	0	0	0	0
DDB0232432_4606636	DDB_G0290779	100	12.3718	115.477	1	1	9.73927	47.3071	0.970061	-1.09243	-1.09243	-0.103907	0.582493	1.73937	-0.18125	-0.818806	0.0556869	1.35996	1	0	0	0	0
DDB0232432_4940094	DDB_G0291065	100	24.9571	269.95	1	168.626	102.501	1	1.03409	-1.39719	0.82973	0.613533	-1.39719	1.81405	-0.609682	1.46153	1.0661	-1.03905	1	0	0	0	0
DDB0232432_4967215	DDB_G0291079	100	27.8901	208.09	1	29.5445	214.034	158.803	0.872802	-1.44545	0.0250267	0.885034	0.75541	1.62592	-0.677518	0.506878	1.44848	1.5695	1	0	0	0	1
DDB0232432_4970421	DDB_G0291109	100	1.00598	101.573	1	41.5311	1	1	2.00419	-0.00258781	1.61579	-0.00258781	-0.00258781	2.94565	1.35085	2.39405	0.198381	0.650951	1	0	0	0	0
DDB0232433_153339	DDB_G0291229	100	38.5041	257.557	1	43.1432	47.1658	25.3292	0.825366	-1.58551	0.0494047	0.0881194	-0.181887	1.57058	-0.874411	0.535798	0.32613	0.433675	1	0	0	0	0
DDB0232433_479292	DDB_G0291524	100	10.8496	250.606	1	31.8496	19.2945	1	1.36358	-1.03541	0.46769	0.250021	-1.03541	2.19839	-0.101092	1.03203	0.554147	-0.60064	1	0	0	0	0
DDB0232433_621174	DDB_G0295709	100	33.5943	197.917	1	1	127.763	16.5129	0.770216	-1.52627	-1.52627	0.58014	-0.308444	1.50625	-0.791129	-1.33348	1.01908	0.280312	1	0	0	0	0
DDB0232433_897224	DDB_G0291964	100	10.8816	133.158	1	37.6711	20.0727	1	1.08767	-1.03669	0.539314	0.265911	-1.03669	1.87656	-0.102893	1.117	0.576526	-0.602193	1	0	0	0	0
DDB0232433_966326	DDB_G0291968	100	40.1131	397.74	1	922.303	376.012	51.8074	0.996313	-1.60329	1.36159	0.971916	0.111106	1.76999	-0.899403	2.09249	1.57084	0.788727	1	0	0	1	0
DDB0232433_1177678	DDB_G0292096	100	64.1257	11.5627	171.243	1	58.1427	80.8132	-0.743974	0.426581	-1.80703	-0.0425365	0.100451	-0.26001	1.95417	-1.66656	0.142119	0.775815	0	1	0	0	0
DDB0232433_1250533	no_geneID	100	18.5759	158.331	1	18.0189	41.5967	1	0.930615	-1.26895	-0.0132217	0.350109	-1.26895	1.69335	-0.429396	0.461502	0.695107	-0.883642	1	0	0	0	0
DDB0232433_1645604	DDB_G0292550	100	25.2317	257.833	127.175	79.812	1	1	1.00939	0.702455	0.500121	-1.40195	-1.40195	1.78524	2.34199	1.0705	-1.77243	-1.04481	1	1	0	0	0
DDB0232433_1927567	DDB_G0292672	100	22.4441	162.368	1	1	6.887	1	0.859398	-1.3511	-1.3511	-0.513071	-1.3511	1.61028	-0.544884	-1.12567	-0.520566	-0.983195	1	0	0	0	0
DDB0232433_1951933	no_geneID	100	51.9302	375.565	3.29562	326.852	89.8378	295.168	0.859265	-1.19748	0.798931	0.238039	0.754648	1.61013	-0.328929	1.42499	0.537272	1.56858	1	0	0	0	1
DDB0232433_2103568	DDB_G0292824	100	1	112.296	1	2.82564	1	1	2.05036	0	0.451116	0	0	2.99951	1.35449	1.01236	0.202026	0.654087	1	0	0	0	0
DDB0232433_2223242	no_geneID	100	1	118.723	1	1	1	1	2.07453	0	0	0	0	3.0277	1.35449	0.477188	0.202026	0.654087	1	0	0	0	0
DDB0232433_2365102	DDB_G0293140	100	27.9021	163.742	1	1	88.6565	18.0063	0.768523	-1.44564	-1.44564	0.502074	-0.190212	1.50428	-0.677781	-1.23782	0.90913	0.423586	1	0	0	0	0
DDB0232433_2597233	DDB_G0295423	100	12.1104	102.629	1	160.93	74.0171	326.962	0.928109	-1.08316	1.12348	0.786172	1.43134	1.69043	-0.168214	1.81001	1.30924	2.3886	1	0	0	0	1
DDB0232433_2613273	DDB_G0293258	100	11.936	150.259	168.619	42.6732	76.254	35.0707	1.09998	1.15005	0.553295	0.805403	0.468085	1.89091	2.97121	1.13358	1.33633	1.22132	1	1	0	0	0
DDB0232433_3098124	DDB_G0293590	100	3.16699	204.264	1	1	27.8803	1	1.80955	-0.500646	-0.500646	0.944652	-0.500646	2.7186	0.65068	-0.116747	1.53244	0.0473979	1	0	0	0	0
DDB0232433_3098505	DDB_G0293590	100	56.3653	512.264	1.11265	197.6	258.453	481.881	0.958482	-1.70465	0.544774	0.66137	0.931928	1.72586	-1.04191	1.12347	1.13348	1.78341	1	0	0	0	1
DDB0232433_3193330	DDB_G0293528	100	1	141.263	1	54.5955	1	1	2.15003	0	1.73716	0	0	3.11577	1.35449	2.53804	0.202026	0.654087	1	0	0	0	0
DDB0232428_85261	no_geneID	10000	3343.31	12119.7	307.88	7904.57	1046.19	565.766	0.559315	-1.03579	0.373702	-0.504564	-0.771539	1.2826	1.56221	1.03753	-0.925029	-0.247009	0	1	0	0	0
DDB0232428_271521	DDB_G0267524	1000	297.971	2392.46	458.928	984.289	2935.88	12104.5	0.90467	0.187571	0.518949	0.993564	1.60877	1.71023	3.38738	1.23386	3.17601	2.81058	1	1	0	1	1
DDB0232428_272275	DDB_G0267524	1000	379.656	3241.37	346.097	301.316	1729.74	5258.38	0.931339	-0.040192	-0.100367	0.658591	1.14146	1.74326	3.04757	0.396732	2.25904	2.2103	1	1	0	1	1
DDB0232428_423298	no_geneID	10000	1559.39	761.399	182.597	1208.06	1613.53	1635.35	-0.311343	-0.931463	-0.110866	0.0148226	0.0206546	0.20451	1.71787	0.382541	0.496762	0.770588	0	1	0	0	0
DDB0232428_961864	DDB_G0267844	1000	453.95	1685.9	250.432	755.111	913.078	2494.41	0.569823	-0.258318	0.221003	0.3035	0.73996	1.29561	2.72215	0.831126	1.287	1.69456	0	1	0	0	1
DDB0232428_1566602	DDB_G0268578	1000	134.129	74.5857	145.538	35.9988	181.158	161.305	-0.254869	0.0354535	-0.571236	0.130534	0.0801247	0.274438	3.16043	-0.239739	0.813516	0.84698	0	1	0	0	0
DDB0232428_1853651	DDB_G0269046	1000	134.325	763.212	156.854	34.8462	184.585	404.933	0.754488	0.0673392	-0.586001	0.138038	0.479226	1.52427	3.208	-0.259698	0.834058	1.35964	1	1	0	0	0
DDB0232428_2565394	DDB_G0269338	1000	429.766	77.8738	100.262	1	397.707	351.762	-0.741841	-0.632098	-2.63323	-0.0336693	-0.0869838	-0.328553	2.1645	-3.02693	0.364018	0.632324	0	1	-1	0	0
DDB0232428_2861962	DDB_G0269486	1000	127.516	1271.82	479.937	156.848	228.427	269.353	0.99886	0.57562	0.0899151	0.253184	0.324757	1.82686	3.96632	0.653936	1.14926	1.16122	1	1	0	0	0
DDB0232428_3171960	DDB_G0269624	1000	124.661	252.123	275.966	268.323	261.77	290.547	0.305881	0.345125	0.332927	0.322188	0.367485	0.968786	3.62244	0.982414	1.33816	1.2161	0	1	0	0	0
DDB0232428_3182265	DDB_G0270586	1000	241.308	1270.51	978.159	566.289	284.772	158.106	0.721405	0.607838	0.370467	0.0719255	-0.183623	1.48331	4.01438	1.03316	0.653078	0.508187	0	1	0	0	0
DDB0232428_3519355	DDB_G0270942	1000	949.885	487.41	142.03	603.656	886.931	465.375	-0.289776	-0.82529	-0.196882	-0.0297815	-0.309868	0.231214	1.87627	0.266274	0.374661	0.346022	0	1	0	0	0
DDB0232428_3521811	DDB_G0269768	1000	407.309	1531.24	470.537	2139.26	278.209	780.376	0.575118	0.0626697	0.720339	-0.165552	0.28238	1.30217	3.20103	1.50608	0.00299618	1.10678	0	1	0	0	0
DDB0232428_3582734	DDB_G0270640	1000	772.722	916.719	279.17	1285.62	2329.06	6513.05	0.0742132	-0.442154	0.22109	0.479158	0.925762	0.681923	2.44788	0.831245	1.76785	1.93323	0	1	0	1	1
DDB0232428_3764029	DDB_G0269864	1000	405.069	227.68	206.606	170.618	611.92	141.346	-0.250203	-0.292386	-0.375503	0.179166	-0.457244	0.280216	2.67132	0.0248317	0.946643	0.156713	0	1	0	0	0
DDB0232428_4047430	DDB_G0269252	10000	1001.98	5468.76	2090.78	1079.96	1951.85	4383.64	0.737031	0.31945	0.0325514	0.289588	0.640978	1.50266	3.58413	0.576398	1.24892	1.56741	1	1	0	0	1
DDB0232428_4222945	DDB_G0270102	1000	137.715	728.32	873.979	463.972	2236.58	9004.43	0.723342	0.802521	0.527511	1.2106	1.81548	1.4857	4.30483	1.24543	3.77014	3.07609	0	1	0	1	1
DDB0232428_4807684	no_geneID	1000	404.117	420.464	140.05	96.0879	336.908	238.43	0.0172218	-0.460224	-0.623839	-0.0789956	-0.229147	0.611354	2.42092	-0.310842	0.23994	0.449711	0	1	0	0	0
DDB0232429_616254	no_geneID	10000	1288.69	1452.43	147.137	925.271	1174.74	755.611	0.0519486	-0.942427	-0.143878	-0.0402062	-0.231849	0.654354	1.70151	0.337918	0.346123	0.44624	0	1	0	0	0
DDB0232429_859832	no_geneID	1000	345.179	183.398	122.899	191.992	106.472	12.4474	-0.274649	-0.448497	-0.254762	-0.510811	-1.44297	0.249946	2.43841	0.188037	-0.942131	-1.10948	0	1	0	0	0
DDB0232429_1165385	DDB_G0272002	1000	248.591	237.139	103.243	291.335	53.2771	2.15936	-0.0204817	-0.381627	0.0689078	-0.668945	-2.06116	0.564668	2.53818	0.62554	-1.37501	-1.90357	0	1	0	0	0
DDB0232429_1662744	DDB_G0272206	1000	257.989	493.138	120.863	142.387	218.84	75.6692	0.281368	-0.329309	-0.25813	-0.0714736	-0.532682	0.938432	2.61623	0.183484	0.260531	0.0598113	0	1	0	0	0
DDB0232429_1746526	DDB_G0272474	1000	143.821	771.564	489.406	473.978	30.215	57.6651	0.729549	0.531846	0.517935	-0.677601	-0.39691	1.49339	3.90101	1.23249	-1.39871	0.234214	0	1	0	0	0
DDB0232429_2071738	DDB_G0272861	1000	253.366	1092.55	134.402	9.95098	497.701	411.921	0.634695	-0.275343	-1.40588	0.293221	0.211066	1.37594	2.69675	-1.36793	1.25886	1.01518	0	1	-1	0	0
DDB0232429_2152175	DDB_G0273009	1000	478.862	605.988	103.134	560.457	385.671	422.919	0.102253	-0.66681	0.068332	-0.0939932	-0.0539537	0.716644	2.11271	0.624762	0.198885	0.674752	0	1	0	0	0
DDB0232429_3242592	DDB_G0273657	1000	156.632	206.615	104.674	34.0556	55.1062	26.718	0.12028	-0.175041	-0.662693	-0.453681	-0.768078	0.738966	2.84639	-0.363361	-0.785741	-0.242563	0	1	0	0	0
DDB0232429_3410648	DDB_G0273795	10000	1296.7	1525.1	135.94	583.381	1012.09	478.77	0.0704596	-0.979492	-0.346887	-0.107619	-0.432712	0.677275	1.64621	0.0635118	0.161586	0.188225	0	1	0	0	0
DDB0232429_3426278	DDB_G0273801	1000	153.154	282.007	115.988	1	108.211	63.5827	0.265131	-0.120714	-2.18513	-0.150855	-0.38179	0.918326	2.92744	-2.42123	0.043228	0.253637	0	1	-1	0	0
DDB0232429_3430705	no_geneID	1000	229.199	47.4092	258.374	109.213	113.109	229.577	-0.684349	0.0520367	-0.321938	-0.306716	0.000715373	-0.257365	3.18517	0.0972355	-0.383433	0.744976	0	1	0	0	0
DDB0232429_3504006	DDB_G0273871	1000	565.98	3146.4	390.912	3053.83	2461.94	7113.55	0.745013	-0.160722	0.732043	0.638477	1.09929	1.51254	2.86775	1.5219	2.20398	2.15612	1	1	0	1	1
DDB0232429_3587042	DDB_G0273949	1000	826.391	3194.74	916.797	2563.39	2793.76	10667.4	0.58725	0.0450879	0.491629	0.529004	1.11087	1.31719	3.1748	1.19693	1.9043	2.17101	0	1	0	1	1
DDB0232429_3672782	DDB_G0274019	10000	1540.42	16520.4	9740.43	845.434	16793.4	45722.2	1.03038	0.800938	-0.260561	1.0375	1.47249	1.86589	4.30247	0.180199	3.29628	2.63551	1	1	0	1	1
DDB0232429_4497116	DDB_G0274651	1000	671.816	415.755	123.138	272.16	527.158	734.05	-0.208412	-0.736858	-0.392425	-0.105309	0.0384755	0.331963	2.0082	0.00195854	0.167907	0.79348	0	1	0	0	0
DDB0232429_4515717	DDB_G0274923	1000	535.297	843.357	143.635	385.507	660.472	1188.08	0.197417	-0.571334	-0.142562	0.0912598	0.346251	0.83448	2.25515	0.339698	0.706004	1.18883	0	1	0	0	0
DDB0232429_5119380	DDB_G0275071	1000	132.08	425.538	2738.1	28.3885	111.205	350.59	0.508101	1.31661	-0.667695	-0.0747124	0.423962	1.21918	5.07182	-0.370122	0.251665	1.28865	0	1	0	0	0
DDB0232429_5217861	DDB_G0275157	1000	142.543	1103.57	1123.42	551.996	491.617	1339.95	0.888851	0.896596	0.587989	0.537679	0.973142	1.69065	4.44519	1.32718	1.92805	1.99409	1	1	0	1	1
DDB0232429_6817923	DDB_G0276403	1000	174.416	626.504	105.238	1	96.2357	97.7674	0.555339	-0.219413	-2.24159	-0.258249	-0.251391	1.27768	2.78019	-2.49754	-0.250757	0.421138	0	1	-1	0	0
DDB0232429_6920015	DDB_G0276435	1000	157.373	479.41	137.344	33.1437	439.133	273.916	0.483777	-0.05912	-0.676529	0.445665	0.240687	1.18906	3.01933	-0.382063	1.67617	1.05323	0	1	0	1	0
DDB0232429_7004399	no_geneID	1000	249.293	335.286	137.748	203.283	382.527	51.0745	0.128705	-0.257627	-0.0886106	0.185951	-0.688507	0.749397	2.72318	0.412623	0.965216	-0.140351	0	1	0	0	0
DDB0232429_7903431	DDB_G0277141	1000	535.292	426.679	138.123	348.029	411.007	549.669	-0.0984897	-0.588325	-0.186976	-0.114742	0.0115103	0.468074	2.2298	0.279664	0.142087	0.758842	0	1	0	0	0
DDB0232429_8173828	no_geneID	10000	1537.43	118349	908657	8372.63	30892.6	60258.2	1.88637	2.7716	0.736067	1.30306	1.59322	2.92582	7.24255	1.52734	4.02324	2.7906	1	1	0	1	1
DDB0232429_8179595	no_geneID	1000	179.195	233.929	2760.05	1.18401	13.9744	1	0.115757	1.18759	-2.17997	-1.10799	-2.25333	0.733365	4.87933	-2.41426	-2.57689	-2.15041	0	1	-1	0	0
DDB0232430_9268	no_geneID	1000	293.863	1436.18	157.859	4277.1	4195.08	29950.4	0.689063	-0.269876	1.163	1.15459	2.00826	1.44326	2.7049	2.10443	3.61682	3.32372	0	1	0	1	1
DDB0232430_682095	DDB_G0278657	1000	838.383	3739.16	430.408	3493.65	2208.08	6971.27	0.649332	-0.289562	0.619838	0.420572	0.91987	1.39406	2.67553	1.37023	1.60748	1.92566	0	1	0	1	1
DDB0232430_703881	DDB_G0278663	1000	136.103	485.02	208.007	21.1068	181.876	397.277	0.551891	0.184209	-0.809446	0.125907	0.465225	1.27341	3.38236	-0.561726	0.800849	1.34165	0	1	0	0	0
DDB0232430_1006669	DDB_G0277843	1000	243.378	478.15	170.962	100.449	214.28	360.963	0.293282	-0.153383	-0.384337	-0.0552995	0.171181	0.953185	2.8787	0.0128907	0.304806	0.963944	0	1	0	0	0
DDB0232430_1252001	DDB_G0278945	1000	179.758	350.858	287.239	72.8807	105.339	101.044	0.290443	0.203555	-0.392076	-0.232099	-0.250178	0.949669	3.41122	0.00243059	-0.179174	0.422696	0	1	0	0	0
DDB0232430_1252700	DDB_G0278945	10000	1253.78	2533.27	1300.82	149.575	1754.29	2507.37	0.305459	0.0159931	-0.923363	0.145878	0.300995	0.968263	3.1314	-0.715708	0.85552	1.13069	0	1	0	0	0
DDB0232430_3196910	DDB_G0280389	1000	315.818	539.277	485.056	54.9473	147.039	21.2893	0.232375	0.186355	-0.759491	-0.332003	-1.17128	0.877767	3.38556	-0.494202	-0.452654	-0.760482	0	1	0	0	0
DDB0232430_3535532	DDB_G0280589	1000	199.247	156.423	170.554	100.878	301.661	331.859	-0.10509	-0.0675281	-0.295594	0.180129	0.221562	0.459902	3.00679	0.132844	0.949277	1.02866	0	1	0	0	0
DDB0232430_3815678	DDB_G0280869	1000	381.981	1486.25	230.416	2758.42	1046.75	1457.85	0.590051	-0.219529	0.858619	0.4378	0.58167	1.32066	2.78002	1.69299	1.65464	1.49123	0	1	0	1	0
DDB0232430_4106731	DDB_G0281151	1000	672.888	364.838	553.806	140.661	243.493	201.34	-0.265843	-0.0845853	-0.679768	-0.441456	-0.524013	0.26085	2.98134	-0.386442	-0.752277	0.0709466	0	1	0	0	0
DDB0232430_4518217	no_geneID	1000	539.008	393.478	100.262	390.822	483.832	219.777	-0.136675	-0.730461	-0.139617	-0.0469008	-0.389614	0.420792	2.01775	0.343678	0.327797	0.243586	0	1	0	0	0
DDB0232430_4570743	no_geneID	10000	1628.25	1478.77	191.571	2112.89	1601	1663.86	-0.0418182	-0.929391	0.113157	-0.0073277	0.00939586	0.538248	1.72096	0.685352	0.436126	0.756126	0	1	0	0	0
DDB0232430_4829972	DDB_G0281573	10000	1170.02	4075.28	764.255	9518.13	10677	44712.5	0.541964	-0.184955	0.910359	0.960255	1.58224	1.26111	2.8316	1.76293	3.08483	2.77649	0	1	0	1	1
DDB0232430_5200378	DDB_G0281971	1000	120.177	493.145	277.109	735.379	117.778	195.888	0.613155	0.36283	0.786691	-0.00875468	0.212187	1.34927	3.64885	1.59577	0.43222	1.01662	0	1	0	0	0
DDB0232430_5354850	DDB_G0282059	10000	1181.21	5938.07	1293	11779.8	6640.05	24912.5	0.70132	0.0392723	0.998812	0.749846	1.32409	1.45844	3.16613	1.88249	2.50885	2.44489	0	1	0	1	1
DDB0232430_5732633	DDB_G0282377	10000	1036.46	3536.61	390.862	1	1383.17	1969.42	0.533035	-0.423529	-3.01555	0.125322	0.278786	1.25006	2.47566	-3.54371	0.799247	1.10217	0	1	-1	0	0
DDB0232430_6110953	DDB_G0282679	1000	194.548	676.898	216.032	2.34409	181.429	932.708	0.541496	0.0454901	-1.91905	-0.0303211	0.680718	1.26053	3.1754	-2.06158	0.373183	1.61846	0	1	-1	0	1
DDB0232430_6242829	no_geneID	1000	101.05	939.75	71.5588	3.26614	300.825	1022.82	0.968475	-0.149874	-1.4905	0.473777	1.00526	1.78924	2.88394	-1.48231	1.75312	2.03535	1	0	-1	1	1
DDB0232431_138085	DDB_G0283067	1000	101.419	616.631	1	143.618	375.296	760.984	0.783906	-2.00612	0.15109	0.568255	0.875257	1.5607	0.114565	0.736626	2.01175	1.86835	1	0	0	1	1
DDB0232431_163444	DDB_G0283015	1000	359.088	681.843	212.919	268.321	5.63449	103.381	0.278483	-0.226987	-0.126547	-1.80435	-0.540761	0.93486	2.76889	0.361345	-4.48311	0.0494336	0	1	0	0	0
DDB0232431_346549	DDB_G0283247	1000	188.776	104.3	105.989	129.595	437.763	10.5392	-0.257661	-0.250686	-0.163359	0.365292	-1.25314	0.270981	2.73353	0.311586	1.45615	-0.86564	0	1	0	0	0
DDB0232431_519227	DDB_G0283341	1000	920.861	1215.45	230.699	798.888	1071.59	210.808	0.120543	-0.601148	-0.0617083	0.0658334	-0.640308	0.739291	2.21067	0.448987	0.636401	-0.0784375	0	1	0	0	0
DDB0232431_1167464	DDB_G0283885	1000	199.162	534.32	935.9	356.219	157.399	110.599	0.428596	0.672024	0.252511	-0.102205	-0.255455	1.12074	4.11014	0.873717	0.176406	0.415917	0	1	0	0	0
DDB0232431_1399282	DDB_G0284007	1000	231.998	79.4187	140.365	166.064	61.2812	41.1544	-0.465561	-0.218226	-0.145207	-0.578156	-0.751067	0.0135493	2.78196	0.336122	-1.12649	-0.220712	0	1	0	0	0
DDB0232431_1671044	DDB_G0284191	1000	425.669	386.501	250.652	751.459	688.932	348.988	-0.0419212	-0.230002	0.246833	0.209104	-0.0862616	0.53812	2.76439	0.866041	1.0286	0.633251	0	1	0	0	0
DDB0232431_1844853	DDB_G0284295	1000	112.94	123.802	413.767	174.607	256.436	124.263	0.0398777	0.563906	0.189212	0.35613	0.0414938	0.639407	3.94884	0.788155	1.43107	0.797357	0	1	0	0	0
DDB0232431_1844857	DDB_G0284295	1000	383.429	1475.73	1924.95	1553.09	916.21	1099.22	0.585321	0.700733	0.607512	0.37831	0.457399	1.3148	4.15298	1.35357	1.49179	1.3316	0	1	0	0	0
DDB0232431_1906685	DDB_G0284375	1000	313.179	2262.25	1	435.537	654.966	1934.16	0.858749	-2.49579	0.143233	0.320427	0.7907	1.65337	-0.615989	0.726005	1.33334	1.75974	1	0	0	0	1
DDB0232431_1918932	DDB_G0284381	1000	131.978	53.2105	264.594	1	38.3101	100.9	-0.394505	0.302078	-2.1205	-0.53719	-0.116614	0.101534	3.55821	-2.33388	-1.01434	0.594263	0	1	-1	0	0
DDB0232431_2050662	DDB_G0284497	1000	201.602	225.651	154.906	121.755	256.567	144.263	0.0489439	-0.114425	-0.219006	0.104706	-0.145339	0.650634	2.93682	0.236369	0.742812	0.557364	0	1	0	0	0
DDB0232431_2633035	DDB_G0285055	10000	1127.15	1391.24	139.521	1046.88	372.905	447.622	0.0914187	-0.907343	-0.0320855	-0.480385	-0.401072	0.703228	1.75385	0.489028	-0.858841	0.228868	0	1	0	0	0
DDB0232431_3547379	DDB_G0285655	1000	132.984	284.95	118.58	64.4257	209.676	524.862	0.330969	-0.0497908	-0.314741	0.197748	0.596244	0.99985	3.03325	0.106964	0.997511	1.50995	0	1	0	0	1
DDB0232431_3728558	DDB_G0285943	1000	208.842	1079.14	147.051	542.892	293.208	908.66	0.713258	-0.15235	0.414895	0.147357	0.638583	1.47322	2.88024	1.09321	0.859568	1.56434	0	1	0	0	1
DDB0232431_3822777	DDB_G0285915	1000	868.267	4959.94	553.221	659.223	1411.82	1828.23	0.756824	-0.195754	-0.119621	0.211126	0.323377	1.52716	2.81549	0.370707	1.03413	1.15945	1	1	0	0	0
DDB0232431_4790387	DDB_G0286649	1000	257.985	28.0073	191.524	67.5917	138.986	76.0011	-0.964323	-0.129372	-0.581702	-0.268625	-0.530775	-0.604041	2.91452	-0.253885	-0.27916	0.0622602	0	1	0	0	0
DDB0232432_942271	DDB_G0287995	1000	117.146	25.4677	129.347	78.413	48.9996	1	-0.662737	0.043029	-0.174339	-0.378534	-2.06873	-0.230603	3.17173	0.296745	-0.58003	-1.91329	0	1	0	0	0
DDB0232432_1323382	DDB_G0288249	1000	249.79	3168.36	509.356	1297.69	98.2473	1	1.10326	0.309446	0.715596	-0.405255	-2.39758	1.95614	3.56921	1.49967	-0.653177	-2.3357	1	1	0	0	0
DDB0232432_1384902	DDB_G0288321	1000	208.696	73.657	101.905	80.63	240.191	188.412	-0.4523	-0.31132	-0.413017	0.0610425	-0.0444052	0.0299696	2.64307	-0.0258758	0.623286	0.687017	0	1	0	0	0
DDB0232432_1604694	DDB_G0288493	1000	295.127	901.858	176.563	205.68	1023.41	395.27	0.485129	-0.223109	-0.156818	0.540039	0.126884	1.19074	2.77468	0.320428	1.93451	0.907044	0	1	0	1	0
DDB0232432_1836979	DDB_G0288695	10000	1331.33	273.08	181.336	1241.76	496.013	268.918	-0.687997	-0.865801	-0.0302488	-0.428793	-0.694667	-0.261881	1.81583	0.491511	-0.717611	-0.148263	0	1	0	0	0
DDB0232432_1973912	DDB_G0288793	1000	194.62	86.0966	137.283	81.3892	83.4068	21.7399	-0.354201	-0.151568	-0.37862	-0.367985	-0.95193	0.151441	2.88141	0.020619	-0.551153	-0.478726	0	1	0	0	0
DDB0232432_2808027	DDB_G0289453	1000	339.645	2987.65	99.3552	1479.98	2641.6	10771.2	0.944304	-0.533835	0.639231	0.890841	1.50124	1.75931	2.3111	1.39644	2.89481	2.67244	1	0	0	1	1
DDB0232432_2821891	DDB_G0289467	1000	179.638	1581.01	57.2532	309.494	1631.9	6031.26	0.944537	-0.496599	0.236254	0.958296	1.52601	1.7596	2.36665	0.851741	3.07947	2.70426	1	0	0	1	1
DDB0232432_3477994	DDB_G0289941	1000	409.622	3911.38	541.197	15209.8	2189.83	3063.33	0.979947	0.120973	1.56974	0.728028	0.873811	1.80345	3.28802	2.65421	2.44912	1.86649	1	1	0	1	1
DDB0232432_3985783	DDB_G0290337	1000	660.935	2417.67	643.19	3041.25	2117.29	4080.02	0.563239	-0.011819	0.662894	0.505621	0.790504	1.28746	3.0899	1.42843	1.84029	1.75948	0	1	0	1	1
DDB0232432_4412797	DDB_G0290485	1000	239.201	197.161	3558.42	2.18033	68.9761	1	-0.0839405	1.1725	-2.04024	-0.540063	-2.37876	0.48609	4.85681	-2.22538	-1.02221	-2.31154	0	1	-1	0	0
DDB0232432_4812213	DDB_G0290961	1000	601.346	579.898	178.942	660.257	286.316	345.785	-0.0157725	-0.526412	0.0405884	-0.322278	-0.240318	0.570499	2.32217	0.587261	-0.426033	0.435361	0	1	0	0	0
DDB0232432_4962097	DDB_G0291079	10000	1966.71	5219.12	297.882	6490.45	3095.02	4500.18	0.423858	-0.819695	0.518535	0.196924	0.35949	1.11487	1.88462	1.2333	0.995255	1.20583	0	1	0	0	0
DDB0232433_28784	no_geneID	1000	637.957	706.565	104.228	665.402	569.554	199.482	0.0443609	-0.786805	0.0182927	-0.0492566	-0.504887	0.644959	1.93369	0.557124	0.321348	0.0955137	0	1	0	0	0
DDB0232433_147515	DDB_G0291229	1000	177.19	572.514	580.97	134.553	161.072	230.709	0.509346	0.515714	-0.119548	-0.0414191	0.114625	1.22073	3.87694	0.370806	0.342803	0.891296	0	1	0	0	0
DDB0232433_170479	DDB_G0291354	1000	607.731	1228.04	171.051	628.685	424.95	395.466	0.305501	-0.550587	0.0147219	-0.155374	-0.186603	0.968315	2.2861	0.552297	0.0308582	0.50436	0	1	0	0	0
DDB0232433_879373	DDB_G0291884	1000	722.696	340.311	158.1	198.885	572.317	28.5487	-0.327079	-0.660024	-0.560354	-0.101319	-1.40337	0.185024	2.12283	-0.225029	0.17883	-1.05861	0	1	0	0	0
DDB0232433_894117	DDB_G0291964	1000	993.949	1615.92	203.157	1760.55	1286.17	2833.37	0.211055	-0.689533	0.248285	0.111935	0.45494	0.851367	2.07881	0.868004	0.762601	1.32844	0	1	0	0	0
DDB0232433_897382	DDB_G0291964	1000	739.508	1515.11	152.232	83.8872	846.423	764.828	0.311501	-0.686438	-0.945247	0.0586443	0.014621	0.975744	2.08342	-0.745289	0.616721	0.762838	0	1	0	0	0
DDB0232433_967052	DDB_G0291968	1000	327.508	2925.46	341.961	7997.73	1512.98	722.505	0.950971	0.018754	1.38774	0.664611	0.343619	1.76757	3.13552	2.40821	2.27552	1.18545	1	1	0	1	0
DDB0232433_1060701	DDB_G0292036	1000	139.659	233.808	114.157	2962.82	456.967	994.267	0.22379	-0.0875652	1.32664	0.514815	0.852433	0.867137	2.9769	2.32561	1.86546	1.83903	0	1	0	1	1
DDB0232433_1494543	no_geneID	1000	708.078	317.859	169.741	469.521	759.68	381.539	-0.347847	-0.620295	-0.178426	0.0305493	-0.268542	0.159309	2.18211	0.29122	0.539813	0.399106	0	1	0	0	0
DDB0232433_1733549	DDB_G0292488	1000	745.238	309.724	134.152	611.766	501.962	412.185	-0.381321	-0.744697	-0.0857099	-0.171624	-0.257203	0.11786	1.99651	0.416544	-0.0136259	0.413672	0	1	0	0	0
DDB0232433_2084082	DDB_G0292796	1000	444.703	1243.35	727.23	454.164	284.864	258.752	0.446524	0.213601	0.00914265	-0.193432	-0.235187	1.14294	3.42621	0.544756	-0.0733244	0.441952	0	1	0	0	0
DDB0232433_2140723	DDB_G0292962	10000	1015.03	1458.2	171.595	781.995	1322.08	1645.16	0.157337	-0.771974	-0.113275	0.114778	0.20973	0.784851	1.95581	0.379284	0.770384	1.01346	0	1	0	0	0
DDB0232433_2257674	DDB_G0292948	1000	544.402	4586.48	168.782	11072.4	4438.75	8918.35	0.92556	-0.508595	1.30832	0.911341	1.21436	1.7361	2.34875	2.30085	2.95093	2.30394	1	1	0	1	1
DDB0232433_2840202	no_geneID	10000	2112.66	1885.92	335.507	646.645	2665.43	3648.48	-0.0493054	-0.799128	-0.514163	0.100937	0.237282	0.528977	1.9153	-0.162594	0.732496	1.04885	0	1	0	0	0
DDB0232433_2916684	DDB_G0293466	10000	1307.94	1675.21	118.018	1346.14	1298.26	413.449	0.107483	-1.04464	0.0125043	-0.003225	-0.500165	0.72312	1.54902	0.5493	0.447357	0.10158	0	1	0	0	0
DDB0232433_3177480	DDB_G0293630	10000	7661.71	4247.03	700.785	2550.43	6193.25	4951.02	-0.256241	-1.03874	-0.477713	-0.0924075	-0.189631	0.27274	1.55782	-0.113324	0.203225	0.50047	0	1	0	0	0
DDB0232433_3312784	DDB_G0295373	10000	1500.43	1352.91	188.595	1478.19	1397.15	1102.35	-0.0449443	-0.900685	-0.00648373	-0.0309723	-0.133897	0.534377	1.76379	0.523634	0.371401	0.572062	0	1	0	0	0
DDB0232433_3518992	DDB_G0293980	1000	325.886	1002.44	1128.38	515.123	583.479	3010.8	0.487992	0.539389	0.198845	0.25296	0.965616	1.19428	3.91226	0.801176	1.14865	1.98442	0	1	0	0	1

## Sheet: Unique_Insertions_Minus_BrCAMP_
chr_pos	gene	bin	start134	DI_r2_meanread	DI_r6_meanread	brcampmeanread	r3_meanread	r6_meanread	DI_r2_logFoldChange	DI_r6_logFoldChange	BrCamp_logFoldChange	growthR3_logFoldChange	growthR6_logFoldChange	DI_r2_ZScoreOfLogFoldChange	DI_r6_ZScoreOfLogFoldChange	BrCamp_ZScoreOfLogFoldChange	growthR3_ZScoreOfLogFoldChange	growthR6_ZScoreOfLogFoldChange	DI_r2_phenotype	DI_r6_phenotype	BrCamp_phenotype	growthR3_phenotype	growthR6_phenotype
DDB0232428_2277	DDB_G0267178	100	16.7955	115.054	1	18.9179	28.9346	16.8544	0.83571	-1.22519	0.0516801	0.236226	0.00152171	1.58265	-0.367882	0.538498	0.534718	0.655931	1	0	0	0	0
DDB0232428_10064	DDB_G0267188	100	84.6572	87.2813	140.876	60.8481	115.014	148.1	0.0132574	0.221173	-0.143417	0.133088	0.242893	0.62328	1.66541	0.307047	0.389462	0.948428	0	1	0	0	0
DDB0232428_250991	DDB_G0267506	100	16.6907	190.427	1	20.785	50.634	16.4192	1.05725	-1.22248	0.0952751	0.481967	-0.00712429	1.84107	-0.364063	0.590216	0.880812	0.645454	1	0	0	0	0
DDB0232428_336418	DDB_G0267560	100	14.2472	126.431	1	30.236	38.7878	13.9409	0.948124	-1.15373	0.326795	0.434966	-0.00944055	1.71378	-0.267421	0.864876	0.814617	0.642647	1	0	0	0	0
DDB0232428_405687	DDB_G0267602	100	23.5955	189.259	1	1	3.6935	44.3072	0.904229	-1.37283	-1.37283	-0.80539	0.273646	1.66257	-0.575428	-1.15145	-0.932259	0.985695	1	0	0	0	0
DDB0232428_567419	DDB_G0267686	100	28.3759	167.203	1	23.7817	13.5881	47.2111	0.770294	-1.45295	-0.0767068	-0.31979	0.221095	1.50634	-0.688062	0.386188	-0.248356	0.922013	1	0	0	0	0
DDB0232428_824060	no_geneID	100	4.6629	139.177	1	84.5725	64.2653	59.9052	1.47491	-0.668656	1.25857	1.13932	1.10881	2.32826	0.414492	1.97028	1.80661	1.99776	1	0	0	0	0
DDB0232428_1013739	DDB_G0267872	100	67.279	1315.02	6871.76	23.8018	7.56758	102.551	1.29105	2.00919	-0.451269	-0.948922	0.18306	2.1138	4.17899	-0.0581695	-1.1344	0.875922	1	1	0	0	0
DDB0232428_1104665	DDB_G0268386	100	17.4512	134.38	1	43.6057	13.2035	1	0.886507	-1.24183	0.397717	-0.121136	-1.24183	1.6419	-0.391266	0.949014	0.031422	-0.850774	1	0	0	0	0
DDB0232428_1106779	DDB_G0267910	100	16.5476	134.154	1	1	39.5026	1.41265	0.908871	-1.21873	-1.21873	0.377892	-1.0687	1.66799	-0.358803	-0.968642	0.734236	-0.640976	1	0	0	0	0
DDB0232428_1279136	DDB_G0268002	100	1	101.397	1	1	14.2687	1	2.00603	0	0	1.15438	0	2.94779	1.35449	0.477188	1.82782	0.654087	1	0	0	0	0
DDB0232428_1528596	DDB_G0268138	100	6.51976	105.959	1	1	35.4348	1	1.21091	-0.814232	-0.814232	0.735198	-0.814232	2.02031	0.209844	-0.488766	1.23745	-0.332609	1	0	0	0	0
DDB0232428_1535837	DDB_G0268144	100	16.6461	201.218	1	14.8088	41.4904	1	1.08235	-1.22131	-0.0507918	0.396635	-1.22131	1.87035	-0.362428	0.416932	0.760633	-0.825915	1	0	0	0	0
DDB0232428_1555958	no_geneID	100	8.32276	120.47	129.596	50.0615	10.6375	61.6594	1.16061	1.19233	0.779236	0.106571	0.869732	1.96164	3.03065	1.40163	0.352117	1.70804	1	1	0	0	0
DDB0232428_1743948	DDB_G0267376	100	80.1278	701.818	1	2.57158	35.8518	278.406	0.942441	-1.90378	-1.49358	-0.349273	0.540894	1.70715	-1.32184	-1.29471	-0.289878	1.30955	1	0	0	0	0
DDB0232428_2794813	DDB_G0269448	100	1	1	100.543	1.20355	66.0097	1	0	2.00235	0.0804656	1.81961	0	0.607816	4.16938	0.572647	2.7647	0.654087	0	1	0	0	0
DDB0232428_2877923	no_geneID	100	6.37252	230.589	1	100.581	86.7282	1	1.55853	-0.804312	1.1982	1.13385	-0.804312	2.4258	0.223789	1.89866	1.7989	-0.320588	1	0	0	0	0
DDB0232428_3108682	DDB_G0270892	100	36.2083	276.1	1	1	44.2095	6.47371	0.882258	-1.55881	-1.55881	0.0867071	-0.747655	1.63695	-0.836877	-1.37208	0.324141	-0.25193	1	0	0	0	0
DDB0232428_3203175	DDB_G0269636	100	4.24618	284.98	1	27.7004	60.9484	1	1.82682	-0.627999	0.814487	1.15696	-0.627999	2.73875	0.471649	1.44344	1.83145	-0.10693	1	0	0	0	0
DDB0232428_3203193	DDB_G0269636	100	1	108.321	1	1	1	1	2.03471	0	0	0	0	2.98126	1.35449	0.477188	0.202026	0.654087	1	0	0	0	0
DDB0232428_3599691	DDB_G0270962	100	6.2443	125.146	1	1	8.09111	1	1.30193	-0.795484	-0.795484	0.112524	-0.795484	2.12649	0.236199	-0.466524	0.360501	-0.30989	1	0	0	0	0
DDB0232428_3913398	DDB_G0269944	100	24.401	354.398	1	65.6693	127.635	50.115	1.16208	-1.38741	0.429954	0.71856	0.312559	1.96335	-0.595924	0.987258	1.21402	1.03285	1	0	0	0	0
DDB0232428_4418525	no_geneID	100	28.702	248.002	387.31	147.903	48.9327	1	0.936542	1.13015	0.712063	0.231687	-1.45791	1.70027	2.94324	1.32193	0.528325	-1.11263	1	1	0	0	0
DDB0232428_4622401	DDB_G0270774	100	16.9508	105.026	1	1	64.655	6.55668	0.792106	-1.22919	-1.22919	0.581412	-0.412506	1.53179	-0.373502	-0.981046	1.02087	0.154207	1	0	0	0	0
DDB0232428_4788634	DDB_G0270404	100	1	118.523	1	1	1	1	2.0738	0	0	0	0	3.02685	1.35449	0.477188	0.202026	0.654087	1	0	0	0	0
DDB0232429_24391	no_geneID	100	1	100.506	1	5.80177	1	1	2.00219	0	0.76356	0	0	2.94332	1.35449	1.38303	0.202026	0.654087	1	0	0	0	0
DDB0232429_107525	DDB_G0271320	100	18.5083	124.111	1	1	48.2411	1	0.826446	-1.26737	-1.26737	0.416051	-1.26737	1.57184	-0.427169	-1.02634	0.787978	-0.881723	1	0	0	0	0
DDB0232429_292762	no_geneID	100	16.1638	106.498	1	55.3618	30.6027	1	0.818799	-1.20854	0.534667	0.277217	-1.20854	1.56292	-0.344476	1.11148	0.592448	-0.81044	1	0	0	0	0
DDB0232429_639058	DDB_G0271552	100	17.1936	100.824	1	36.4594	1	1	0.768196	-1.23537	0.326443	-1.23537	-1.23537	1.5039	-0.382186	0.864459	-1.53782	-0.842946	1	0	0	0	0
DDB0232429_678560	DDB_G0271504	100	7.25897	174.891	1	1	12.2901	1	1.38189	-0.860875	-0.860875	0.228679	-0.860875	2.21976	0.144273	-0.5441	0.52409	-0.389132	1	0	0	0	0
DDB0232429_979009	DDB_G0271870	100	7.59828	132.284	79.4882	1	9.61843	1	1.24079	1.01959	-0.880715	0.102389	-0.880715	2.05517	2.78781	-0.567638	0.346227	-0.413175	1	0	0	0	0
DDB0232429_1059926	DDB_G0271904	100	8.9967	107.189	1	70.1145	8.82404	1	1.07607	-0.954083	0.891725	-0.00841581	-0.954083	1.86302	0.013241	1.53507	0.190173	-0.502083	1	0	0	0	0
DDB0232429_1199978	DDB_G0272088	100	6.22293	165.021	1	37.5929	29.765	1	1.42354	-0.793995	0.781111	0.679711	-0.793995	2.26834	0.238292	1.40385	1.15931	-0.308086	1	0	0	0	0
DDB0232429_1318787	DDB_G0272364	100	11.3521	165.887	1	1	9.50463	1	1.16474	-1.05508	-1.05508	-0.077141	-1.05508	1.96645	-0.128734	-0.774488	0.0933829	-0.624467	1	0	0	0	0
DDB0232429_2046810	DDB_G0272674	100	19.0755	270.105	1	74.7409	1	1	1.15106	-1.28048	0.593083	-1.28048	-1.28048	1.95049	-0.445598	1.18078	-1.60135	-0.897609	1	0	0	0	0
DDB0232429_3051513	DDB_G0273583	100	45.1635	328.523	1	183.454	79.2024	1	0.861779	-1.65479	0.608741	0.243951	-1.65479	1.61306	-0.971804	1.19936	0.545598	-1.35121	1	0	0	0	0
DDB0232429_3226823	DDB_G0273647	100	9.15066	107.982	1	1.34036	13.817	1	1.0719	-0.961452	-0.834232	0.178963	-0.961452	1.85816	0.00288192	-0.512493	0.454071	-0.511013	1	0	0	0	0
DDB0232429_3227213	DDB_G0273647	100	7.89082	187.964	1	1	16.834	74.7499	1.37695	-0.897122	-0.897122	0.329064	0.976488	2.21399	0.0933168	-0.587102	0.665469	1.83741	1	0	0	0	0
DDB0232429_3320222	DDB_G0273719	100	5.59251	126.111	1	191.105	45.1567	1	1.35315	-0.747607	1.53366	0.907115	-0.747607	2.18622	0.303505	2.29663	1.47958	-0.251872	1	0	0	0	0
DDB0232429_3400332	DDB_G0273781	100	1	161.584	1	1	44.5769	37.8357	2.2084	0	0	1.64911	1.5779	3.18385	1.35449	0.477188	2.52458	2.56621	1	0	0	0	0
DDB0232429_3571948	DDB_G0273935	100	24.051	258.54	76.9648	41.5311	106.22	45.1985	1.03139	0.50516	0.237241	0.645074	0.273992	1.81091	2.06463	0.758635	1.11053	0.986114	1	0	0	0	0
DDB0232429_4533421	no_geneID	100	89.8155	29.1869	114.689	1	28.875	1	-0.488163	0.106171	-1.95335	-0.492829	-1.95335	0.0383867	1.50374	-1.84015	-0.492058	-1.71301	0	1	0	0	0
DDB0232429_4574677	DDB_G0274451	100	1	152.339	1	1	8.61463	1	2.18281	0	0	0.935237	0	3.15401	1.35449	0.477188	1.51918	0.654087	1	0	0	0	0
DDB0232429_4637173	no_geneID	100	58.605	1	104.886	1	93.4506	48.2992	-1.76793	0.252782	-1.76793	0.202648	-0.0839947	-1.45443	1.70984	-1.62018	0.487428	0.552301	0	1	0	0	0
DDB0232429_5065682	DDB_G0275103	100	12.602	110.746	1	1	34.8432	1	0.943892	-1.10044	-1.10044	0.44168	-1.10044	1.70884	-0.192503	-0.828303	0.824074	-0.679437	1	0	0	0	0
DDB0232429_5073852	DDB_G0275171	100	32.2158	234.31	1	170.103	23.0173	77.9575	0.861722	-1.50807	0.722644	-0.146015	0.383789	1.61299	-0.765547	1.33449	-0.00361646	1.11917	1	0	0	0	0
DDB0232429_5261759	DDB_G0275155	100	5.67799	150.48	1	94.913	1	1	1.42328	-0.754195	1.22313	-0.754195	-0.754195	2.26804	0.294243	1.92823	-0.860157	-0.259855	1	0	0	0	0
DDB0232429_5499907	DDB_G0275391	100	7.37693	113.3	1	23.3207	17.1687	1	1.18635	-0.867875	0.499865	0.366863	-0.867875	1.99166	0.134432	1.0702	0.718703	-0.397615	1	0	0	0	0
DDB0232429_5697843	DDB_G0275855	100	21.5881	252.168	1	49.9051	79.0566	23.0674	1.06748	-1.33422	0.36393	0.563723	0.0287825	1.853	-0.521146	0.908931	0.995954	0.688966	1	0	0	0	0
DDB0232429_5707101	no_geneID	100	62.4284	270.562	134.062	1	14.9533	42.8968	0.636885	0.331924	-1.79538	-0.620646	-0.162958	1.35073	1.8211	-1.65274	-0.672071	0.456613	0	1	0	0	0
DDB0232429_6314962	DDB_G0276027	100	28.3584	254.91	1	1	162.751	54.2273	0.953706	-1.45268	-1.45268	0.758842	0.281537	1.72029	-0.687685	-1.24618	1.27075	0.995257	1	0	0	0	0
DDB0232429_6538917	DDB_G0276037	100	9.29831	107.113	1	1	32.9585	1	1.06144	-0.968404	-0.968404	0.549564	-0.968404	1.84595	-0.00689071	-0.671666	0.976013	-0.519437	1	0	0	0	0
DDB0232429_7030196	no_geneID	100	1	100.263	1	1	21.0745	1	2.00114	0	0	1.32376	0	2.94209	1.35449	0.477188	2.06636	0.654087	1	0	0	0	0
DDB0232429_7237350	DDB_G0294921	100	1	111.657	1	1	46.7574	1	2.04789	0	0	1.66985	0	2.99662	1.35449	0.477188	2.55379	0.654087	1	0	0	0	0
DDB0232429_7336829	DDB_G0276887	100	13.1969	159.447	1	1	35.8903	1	1.08214	-1.12047	-1.12047	0.434505	-1.12047	1.87011	-0.220666	-0.85207	0.813968	-0.703715	1	0	0	0	0
DDB0232429_7402886	DDB_G0276823	100	16.5142	147.375	1	86.1074	66.7085	39.7814	0.950566	-1.21786	0.717183	0.606324	0.381823	1.71663	-0.357571	1.32801	1.05595	1.11679	1	0	0	0	0
DDB0232429_7465429	DDB_G0276841	100	25.6015	151.374	43.0573	131.736	11.6512	81.2281	0.771787	0.225782	0.711438	-0.341894	0.501441	1.50808	1.67189	1.32119	-0.279486	1.26174	1	0	0	0	0
DDB0232429_7527114	DDB_G0276865	100	6.32535	170.576	1	1	23.7445	45.6347	1.43083	-0.801084	-0.801084	0.574479	0.858211	2.27684	0.228326	-0.473168	1.0111	1.69408	1	0	0	0	0
DDB0232429_7620848	DDB_G0277301	100	17.9348	133.944	1	52.3089	12.4887	14.3557	0.873226	-1.2537	0.464879	-0.157179	-0.0966727	1.62641	-0.407954	1.02869	-0.01934	0.536938	1	0	0	0	0
DDB0232429_7662643	DDB_G0277219	100	1	150.858	1	1	6.42408	1	2.17857	0	0	0.807811	0	3.14906	1.35449	0.477188	1.33972	0.654087	1	0	0	0	0
DDB0232429_7688334	DDB_G0277177	100	5.83827	107.871	1	1	10.7806	1	1.26662	-0.766284	-0.766284	0.266359	-0.766284	2.08529	0.277248	-0.431884	0.577156	-0.274505	1	0	0	0	0
DDB0232429_7730980	DDB_G0277193	100	19.876	256.252	1	78.6276	46.4787	1	1.11034	-1.29833	0.597246	0.368925	-1.29833	1.90299	-0.470698	1.18572	0.721607	-0.919245	1	0	0	0	0
DDB0232429_8257254	DDB_G0277661	100	5.13329	127.934	1	174.923	36.7279	1	1.39659	-0.710396	1.53245	0.8546	-0.710396	2.2369	0.355815	2.29519	1.40562	-0.206779	1	0	0	0	0
DDB0232430_244178	DDB_G0278079	100	12.7596	143.368	78.9014	185.362	57.2078	1	1.05062	0.791248	1.16218	0.651619	-1.10584	1.83333	2.46682	1.85593	1.11974	-0.68598	1	0	0	0	0
DDB0232430_270828	DDB_G0278099	100	37.0777	80.9355	137.309	1	39.0166	39.4951	0.339026	0.568585	-1.56911	0.0221364	0.0274297	1.00328	2.1538	-1.38431	0.233202	0.687327	0	1	0	0	0
DDB0232430_562831	DDB_G0277853	100	1	168.135	1	93.1634	18.4756	1	2.22566	0	1.96925	1.2666	0	3.20399	1.35449	2.81338	1.98586	0.654087	1	0	0	0	0
DDB0232430_681938	DDB_G0278657	100	43.2931	69.1518	129.381	5.11023	255.094	36.992	0.203385	0.475451	-0.927978	0.770281	-0.0683116	0.845059	2.02287	-0.623707	1.28686	0.571306	0	1	0	0	0
DDB0232430_818179	DDB_G0278393	100	15.2839	374.71	1	7.90686	35.1712	1	1.38946	-1.18423	-0.286231	0.361952	-1.18423	2.22858	-0.310304	0.137622	0.711787	-0.780984	1	0	0	0	0
DDB0232430_907607	DDB_G0278457	100	8.74462	186.86	1	1	18.0135	1	1.32977	-0.941741	-0.941741	0.313857	-0.941741	2.15896	0.0305918	-0.640035	0.644051	-0.487127	1	0	0	0	0
DDB0232430_965656	DDB_G0278491	100	15.2873	103.366	1	1	1	1	0.830045	-1.18433	-1.18433	-1.18433	-1.18433	1.57604	-0.31044	-0.927829	-1.46595	-0.781101	1	0	0	0	0
DDB0232430_987722	DDB_G0278509	100	1.74519	143.592	1	1	80.9416	72.0186	1.91529	-0.241842	-0.241842	1.66633	1.6156	2.84195	1.01451	0.190282	2.54883	2.6119	1	0	0	0	0
DDB0232430_1004940	DDB_G0278699	100	31.2466	399.568	1	24.9342	44.6399	33.5214	1.10679	-1.4948	-0.0980062	0.154921	0.0305192	1.89886	-0.746898	0.360919	0.420211	0.691071	1	0	0	0	0
DDB0232430_1105973	no_geneID	100	65.9846	7.00553	177.323	17.7884	45.1405	1	-0.974002	0.429321	-0.569306	-0.164877	-1.81944	-0.528331	1.95802	-0.198202	-0.0301811	-1.55074	0	1	0	0	0
DDB0232430_1129676	DDB_G0278759	100	20.7318	186.538	1	1	1.83152	55.0931	0.954132	-1.31664	-1.31664	-1.05382	0.424461	1.72078	-0.496433	-1.08479	-1.28214	1.16845	1	0	0	0	0
DDB0232430_1295570	DDB_G0278859	100	7.61794	125.185	1	42.7132	8.19581	1	1.21571	-0.881838	0.748725	0.0317546	-0.881838	2.02591	0.114804	1.36543	0.246748	-0.414535	1	0	0	0	0
DDB0232430_1525378	DDB_G0279021	100	26.6921	176.369	1	1	4.47879	1	0.82004	-1.42638	-1.42638	-0.775222	-1.42638	1.56437	-0.650714	-1.21498	-0.889771	-1.07442	1	0	0	0	0
DDB0232430_1657351	DDB_G0279117	100	1	100.7	1	1	5.8923	1	2.00303	0	0	0.770285	0	2.9443	1.35449	0.477188	1.28687	0.654087	1	0	0	0	0
DDB0232430_1808254	no_geneID	100	94.8661	226.689	127.748	243.229	50.3659	1	0.37832	0.129244	0.408904	-0.274975	-1.97711	1.04912	1.53617	0.962286	-0.185239	-1.7418	0	1	0	0	0
DDB0232430_1984944	DDB_G0279359	100	11.8627	123.429	1	1	10.6058	1	1.01723	-1.07418	-1.07418	-0.0486418	-1.07418	1.79439	-0.155596	-0.797157	0.13352	-0.647623	1	0	0	0	0
DDB0232430_2026915	DDB_G0279425	100	15.6811	73.7439	446.105	7.41535	1	1	0.672349	1.45406	-0.325245	-1.19538	-1.19538	1.39209	3.39859	0.091337	-1.4815	-0.794486	0	1	0	0	0
DDB0232430_2029531	DDB_G0279425	100	5.6032	443.339	930.448	1.45762	20.4986	1	1.8983	2.22026	-0.584793	0.563289	-0.748436	2.82213	4.47571	-0.216574	0.995344	-0.252877	1	1	0	0	0
DDB0232430_2104290	DDB_G0279411	100	51.9351	418.606	1	215.129	58.2971	243.777	0.906344	-1.71546	0.617238	0.0501859	0.671531	1.66504	-1.0571	1.20944	0.272706	1.46786	1	0	0	0	0
DDB0232430_2518248	DDB_G0279789	100	20.7306	168.529	1	1	43.9002	1	0.910064	-1.31661	-1.31661	0.325855	-1.31661	1.66938	-0.496398	-1.08476	0.660949	-0.941399	1	0	0	0	0
DDB0232430_2894508	DDB_G0280073	100	34.0314	373.755	1	1	1	1	1.04071	-1.53188	-1.53188	-1.53188	-1.53188	1.82177	-0.799021	-1.34014	-1.95542	-1.20226	1	0	0	0	0
DDB0232430_3219292	DDB_G0280299	100	8.0488	133.577	1	1	31.0215	1	1.22	-0.905731	-0.905731	0.585931	-0.905731	2.03091	0.0812141	-0.597315	1.02723	-0.44349	1	0	0	0	0
DDB0232430_3556793	DDB_G0294585	100	14.041	109.767	1	1	49.1108	91.0183	0.893075	-1.1474	-1.1474	0.543779	0.811731	1.64956	-0.258519	-0.884013	0.967866	1.63775	1	0	0	0	0
DDB0232430_3885859	DDB_G0280923	100	9.59541	111.845	1	1	16.991	31.6255	1.06655	-0.982064	-0.982064	0.248156	0.517974	1.85192	-0.0260934	-0.687871	0.55152	1.28178	1	0	0	0	0
DDB0232430_3935315	DDB_G0281011	100	9.31264	112.972	1	57.8974	40.3926	5.9759	1.0839	-0.969073	0.793586	0.637229	-0.192669	1.87215	-0.00783108	1.41865	1.09948	0.420608	1	0	0	0	0
DDB0232430_4034984	DDB_G0281087	100	10.3416	134.625	1	23.4241	1	13.443	1.11454	-1.01459	0.355078	-1.01459	0.113912	1.9079	-0.071813	0.89843	-1.22688	0.792127	1	0	0	0	0
DDB0232430_4196858	DDB_G0281203	100	10.193	188.478	1	1	18.6663	1	1.26696	-1.0083	-1.0083	0.262756	-1.0083	2.08569	-0.062979	-0.718998	0.572083	-0.567786	1	0	0	0	0
DDB0232430_4321613	DDB_G0281333	100	16.2927	137.785	1	1	71.3329	1	0.927211	-1.21199	-1.21199	0.641298	-1.21199	1.68938	-0.349325	-0.960644	1.10521	-0.81462	1	0	0	0	0
DDB0232430_4405545	DDB_G0281377	100	24.0438	330.098	1	1	22.4539	14.6372	1.13764	-1.381	-1.381	-0.0297099	-0.215545	1.93484	-0.586919	-1.16115	0.160183	0.392887	1	0	0	0	0
DDB0232430_4512369	DDB_G0295123	100	13.4685	156.011	1	36.2293	47.4359	1	1.06384	-1.12932	0.429742	0.546789	-1.12932	1.84876	-0.233102	0.987007	0.972105	-0.714434	1	0	0	0	0
DDB0232430_4613025	DDB_G0281493	100	16.9496	126.017	1	1	1	1	0.871268	-1.22916	-1.22916	-1.22916	-1.22916	1.62413	-0.373459	-0.98101	-1.52908	-0.835424	1	0	0	0	0
DDB0232430_4655541	DDB_G0281515	100	7.77592	118.822	1	29.0835	92.9618	2.21945	1.18414	-0.890752	0.572894	1.07755	-0.544507	1.98909	0.102272	1.15683	1.71961	-0.00575313	1	0	0	0	0
DDB0232430_4959006	DDB_G0281545	100	52.2263	537.287	1516.48	109.209	57.6935	219.536	1.01232	1.46295	0.320371	0.0432379	0.623616	1.78866	3.41109	0.857256	0.26292	1.40979	1	1	0	0	0
DDB0232430_5419907	DDB_G0282121	100	18.7349	165.883	1	80.8838	42.8255	80.4523	0.947149	-1.27265	0.63521	0.359051	0.632887	1.71264	-0.4346	1.23076	0.707701	1.42103	1	0	0	0	0
DDB0232430_5587079	DDB_G0282263	100	6.21045	103.384	1	1	1	1	1.22133	-0.793123	-0.793123	-0.793123	-0.793123	2.03247	0.239518	-0.463724	-0.914982	-0.307029	1	0	0	0	0
DDB0232430_5781010	DDB_G0282455	100	17.6953	162.818	1	33.2327	38.4867	1	0.963845	-1.24786	0.273708	0.337453	-1.24786	1.73212	-0.399744	0.801898	0.677284	-0.858082	1	0	0	0	0
DDB0232430_5807547	DDB_G0282469	100	22.7584	191.385	1	1	4.10091	1	0.924767	-1.35714	-1.35714	-0.744261	-1.35714	1.68653	-0.553374	-1.13284	-0.846166	-0.990513	1	0	0	0	0
DDB0232430_5832802	DDB_G0282765	100	15.0611	115.944	1	1	10.3154	1	0.886392	-1.17786	-1.17786	-0.16437	-1.17786	1.64177	-0.301337	-0.920146	-0.0294681	-0.773253	1	0	0	0	0
DDB0232430_5940434	DDB_G0282787	100	1	133.627	1	5.36625	42.1213	46.5113	2.12589	0	0.729671	1.6245	1.66756	3.08761	1.35449	1.34282	2.48992	2.67486	1	0	0	0	0
DDB0232430_5977483	DDB_G0282587	100	6.45461	128.509	1	1	1	1	1.29906	-0.80987	-0.80987	-0.80987	-0.80987	2.12314	0.215976	-0.483591	-0.938568	-0.327323	1	0	0	0	0
DDB0232430_6018500	DDB_G0282625	100	11.3665	149.15	1	1	59.9986	50.1583	1.118	-1.05563	-1.05563	0.722516	0.644718	1.91193	-0.129506	-0.77514	1.21959	1.43536	1	0	0	0	0
DDB0232430_6185954	no_geneID	100	1	112.541	1	1	1	1	2.05131	0	0	0	0	3.00062	1.35449	0.477188	0.202026	0.654087	1	0	0	0	0
DDB0232431_99538	DDB_G0282981	100	10.2085	100.537	1	66.1958	30.606	1	0.993363	-1.00896	0.811869	0.476845	-1.00896	1.76655	-0.0639059	1.44034	0.873598	-0.568585	1	0	0	0	0
DDB0232431_163274	DDB_G0283015	100	13.4781	270.082	52.1294	1	6.94679	1	1.30187	0.587453	-1.12963	-0.287846	-1.12963	2.12641	2.18032	-0.862934	-0.203366	-0.714813	1	0	0	0	0
DDB0232431_654751	DDB_G0283417	100	35.056	1	106.81	1	90.9995	1	-1.54476	0.483851	-1.54476	0.414276	-1.54476	-1.19411	2.03468	-1.35542	0.785478	-1.21788	0	1	0	0	0
DDB0232431_1147674	no_geneID	100	51.8824	350.484	1	36.0136	77.4573	13.6868	0.829648	-1.71502	-0.158554	0.174042	-0.578719	1.57558	-1.05648	0.289089	0.447141	-0.0472115	1	0	0	0	0
DDB0232431_1190791	DDB_G0283833	100	10.7355	100.318	1	95.5037	1	1	0.970557	-1.03082	0.949197	-1.03082	-1.03082	1.73994	-0.0946395	1.60326	-1.24975	-0.595078	1	0	0	0	0
DDB0232431_1793640	DDB_G0284261	100	24.1775	154.799	1	13.8697	9.87109	1	0.806358	-1.38341	-0.241345	-0.389046	-1.38341	1.54841	-0.590305	0.190872	-0.345893	-1.02235	1	0	0	0	0
DDB0232431_2141245	DDB_G0284537	100	15.9683	157.775	1	1	1	1	0.99478	-1.20326	-1.20326	-1.20326	-1.20326	1.7682	-0.337046	-0.950282	-1.4926	-0.804036	1	0	0	0	0
DDB0232431_2485180	DDB_G0284789	100	13.593	102.001	1	1	13.1169	32.4571	0.875289	-1.13332	-1.13332	-0.015484	0.377994	1.62882	-0.238724	-0.867308	0.180219	1.11214	1	0	0	0	0
DDB0232431_2862340	DDB_G0285109	100	1	123.625	1	1	48.5896	1	2.09211	0	0	1.68654	0	3.0482	1.35449	0.477188	2.5773	0.654087	1	0	0	0	0
DDB0232431_3080238	DDB_G0285309	100	3.27384	170.874	1	1	28.5921	1	1.71762	-0.515057	-0.515057	0.941188	-0.515057	2.61137	0.630421	-0.133844	1.52756	0.0299345	1	0	0	0	0
DDB0232431_3185149	DDB_G0285409	100	33.1137	259.141	1	40.148	78.2958	1	0.893528	-1.52001	0.0836564	0.373731	-1.52001	1.65009	-0.782332	0.576432	0.728375	-1.18788	1	0	0	0	0
DDB0232431_3367814	DDB_G0285751	100	10.5047	128.612	1	1	1	1	1.0879	-1.02138	-1.02138	-1.02138	-1.02138	1.87682	-0.0813708	-0.734519	-1.23646	-0.58364	1	0	0	0	0
DDB0232431_3396996	DDB_G0285577	100	11.3518	102.638	1	6.49331	3.64115	1	0.956244	-1.05506	-0.242599	-0.493826	-1.05506	1.72325	-0.128717	0.189384	-0.493462	-0.624453	1	0	0	0	0
DDB0232431_3409669	DDB_G0285583	100	35.0847	207.746	1	22.1636	53.673	1	0.772414	-1.54512	-0.199477	0.184638	-1.54512	1.50882	-0.817632	0.24054	0.462064	-1.21831	1	0	0	0	0
DDB0232431_4035645	DDB_G0286079	100	1	206.081	1	1	1	1	2.31404	0	0	0	0	3.30708	1.35449	0.477188	0.202026	0.654087	1	0	0	0	0
DDB0232431_4240078	DDB_G0286243	100	24.8623	202.39	1	1	79.0234	29.29	0.910648	-1.39554	-1.39554	0.502214	0.0711772	1.67006	-0.607358	-1.1784	0.909327	0.740341	1	0	0	0	0
DDB0232431_4277214	no_geneID	100	47.2475	291.44	1	103.469	35.696	22.4866	0.790171	-1.67438	0.34043	-0.12176	-0.322456	1.52953	-0.999346	0.881053	0.0305434	0.263331	1	0	0	0	0
DDB0232431_4487317	no_geneID	100	1	117.95	1	1	23.3821	20.8272	2.0717	0	0	1.36888	1.31863	3.0244	1.35449	0.477188	2.12991	2.25202	1	0	0	0	0
DDB0232431_4498780	DDB_G0286437	100	1.27258	114.18	1	1	7.87606	1	1.95291	-0.104684	-0.104684	0.791625	-0.104684	2.88583	1.20732	0.352997	1.31692	0.52723	1	0	0	0	0
DDB0232431_4530116	no_geneID	100	23.532	183.302	2.89658	93.3116	29.5679	44.5747	0.891509	-0.909774	0.598277	0.0991623	0.27743	1.64774	0.0755316	1.18695	0.341683	0.99028	1	0	0	0	0
DDB0232431_4614670	DDB_G0286543	100	20.3767	120.761	1	35.5378	26.8838	1	0.772795	-1.30913	0.241557	0.120358	-1.30913	1.50926	-0.485885	0.763756	0.371534	-0.932337	1	0	0	0	0
DDB0232431_4666454	DDB_G0286789	100	12.6885	109.466	1	1	2.82317	1	0.935867	-1.10341	-1.10341	-0.652675	-1.10341	1.69948	-0.196684	-0.831831	-0.71718	-0.683041	1	0	0	0	0
DDB0232431_5088839	DDB_G0286925	100	1	124.587	1	1	4.94996	1	2.09547	0	0	0.694602	0	3.05213	1.35449	0.477188	1.18028	0.654087	1	0	0	0	0
DDB0232431_5191594	DDB_G0287003	100	26.7215	230.27	1	1	26.8316	1	0.935376	-1.42686	-1.42686	0.0017866	-1.42686	1.69891	-0.651386	-1.21555	0.204542	-1.075	1	0	0	0	0
DDB0232431_5206007	DDB_G0287013	100	13.0935	169.047	75.6856	6.95433	10.3946	1	1.11095	0.761958	-0.2748	-0.100246	-1.11705	1.90371	2.42564	0.151183	0.0608423	-0.699574	1	0	0	0	0
DDB0232431_5227643	DDB_G0287047	100	25.8146	229.935	1	1	36.6061	23.072	0.94974	-1.41186	-1.41186	0.151689	-0.0487802	1.71566	-0.630305	-1.19776	0.415659	0.594975	1	0	0	0	0
DDB0232431_5229492	no_geneID	100	5.04757	136.264	1	37.6124	81.0464	1	1.4313	-0.703082	0.872249	1.20565	-0.703082	2.27739	0.366097	1.51197	1.90003	-0.197917	1	0	0	0	0
DDB0232431_5428716	DDB_G0287169	100	61.9853	468.506	1	5088.31	16.1549	1	0.878427	-1.79229	1.91429	-0.583983	-1.79229	1.63248	-1.1651	2.74818	-0.620437	-1.51783	1	0	0	0	0
DDB0232432_20501	no_geneID	100	1	3.20844	110.424	1	1	1	0.506295	2.04306	0	0	0	1.19839	4.22661	0.477188	0.202026	0.654087	0	1	0	0	0
DDB0232432_24396	DDB_G0287229	100	5.34872	134.745	1	1	1	1	1.40126	-0.72825	-0.72825	-0.72825	-0.72825	2.24235	0.330716	-0.386762	-0.823617	-0.228415	1	0	0	0	0
DDB0232432_472328	DDB_G0287615	100	2.53656	112.419	1	71.9586	8.03876	1	1.64659	-0.404246	1.45284	0.500943	-0.404246	2.52852	0.786199	2.20074	0.907537	0.164217	1	0	0	0	0
DDB0232432_489962	DDB_G0287625	100	1	111.982	1	1	1	1	2.04915	0	0	0	0	2.99809	1.35449	0.477188	0.202026	0.654087	1	0	0	0	0
DDB0232432_852808	DDB_G0287943	100	3.72261	116.004	1	1	1	13.6919	1.49362	-0.570848	-0.570848	-0.570848	0.565617	2.35009	0.551991	-0.20003	-0.601937	1.33951	1	0	0	0	0
DDB0232432_1168465	DDB_G0288161	100	28.4742	275.39	1	5.09264	90.3438	136.26	0.985497	-1.45445	-0.747508	0.501447	0.679919	1.75737	-0.690173	-0.409609	0.908247	1.47802	1	0	0	0	0
DDB0232432_1173191	DDB_G0288165	100	10.9793	135.056	1	1	1	1	1.08994	-1.04057	-1.04057	-1.04057	-1.04057	1.8792	-0.108346	-0.757283	-1.26348	-0.606892	1	0	0	0	0
DDB0232432_1187212	DDB_G0288193	100	1	104.906	1	6.95433	31.9789	1	2.0208	0	0.842255	1.50486	0	2.96503	1.35449	1.47639	2.32143	0.654087	1	0	0	0	0
DDB0232432_1424982	DDB_G0288361	100	15.6061	118.359	1	1	29.9573	1	0.87991	-1.19329	-1.19329	0.283209	-1.19329	1.63421	-0.323038	-0.93846	0.600888	-0.791961	1	0	0	0	0
DDB0232432_1624726	DDB_G0288507	100	40.8965	310.955	1	40.148	22.6974	61.4443	0.881012	-1.61169	-0.00802158	-0.255709	0.176796	1.63549	-0.911212	0.467671	-0.158106	0.868331	1	0	0	0	0
DDB0232432_1637866	DDB_G0288521	100	26.4484	355.068	1	85.4623	43.0011	39.9415	1.12791	-1.4224	0.509376	0.211081	0.179026	1.9235	-0.645114	1.08148	0.499305	0.871033	1	0	0	0	0
DDB0232432_1722468	DDB_G0288587	100	4.95371	102.942	88.2195	26.7783	99.2637	16.0506	1.31766	1.25063	0.732853	1.30186	0.510561	2.14483	3.11262	1.3466	2.03552	1.27279	1	0	0	0	0
DDB0232432_1976564	DDB_G0288795	100	12.9018	105.535	1	9.95098	1	1	0.912745	-1.11065	-0.112786	-1.11065	-1.11065	1.67251	-0.206862	0.343386	-1.36218	-0.691815	1	0	0	0	0
DDB0232432_2276316	DDB_G0289051	100	14.6828	123.292	1	113.831	38.5365	7.05449	0.924125	-1.16681	0.88945	0.419063	-0.318345	1.68578	-0.285809	1.53238	0.79222	0.268313	1	0	0	0	0
DDB0232432_2286728	DDB_G0289039	100	14.3681	100.096	1	1	20.1279	1	0.843015	-1.1574	-1.1574	0.146398	-1.1574	1.59117	-0.272581	-0.89588	0.408208	-0.748466	1	0	0	0	0
DDB0232432_2628402	no_geneID	100	37.1629	224.58	1	19.6325	45.0634	1.16375	0.781262	-1.57011	-0.277134	0.0837152	-1.50425	1.51914	-0.852764	0.148413	0.319927	-1.16878	1	0	0	0	0
DDB0232432_2708272	no_geneID	100	17.8192	122.149	1	1	24.0398	35.4271	0.836004	-1.25089	-1.25089	0.130043	0.298449	1.58299	-0.404004	-1.00679	0.385174	1.01575	1	0	0	0	0
DDB0232432_3020799	DDB_G0289609	100	10.0451	1	131.504	1	1	1	-1.00196	1.11698	-1.00196	-1.00196	-1.00196	-0.560939	2.92473	-0.71147	-1.2091	-0.560096	0	1	0	0	0
DDB0232432_3227483	DDB_G0289761	100	33.9215	208.253	64.6065	111.152	65.0337	8.69719	0.788115	0.279801	0.515442	0.282663	-0.591096	1.52713	1.74783	1.08868	0.600119	-0.0622107	1	0	0	0	0
DDB0232432_3338339	DDB_G0289811	100	13.65	101.951	1	82.1404	56.6982	30.794	0.873258	-1.13513	0.779423	0.618436	0.353332	1.62645	-0.241278	1.40185	1.07301	1.08226	1	0	0	0	0
DDB0232432_3742905	DDB_G0290179	100	47.7146	350.433	178.294	39.3518	24.8963	1.57859	0.865954	0.572487	-0.0836864	-0.282517	-1.48038	1.61793	2.15928	0.377907	-0.195862	-1.13986	1	1	0	0	0
DDB0232432_3906873	DDB_G0290259	100	27.7186	261.946	1	94.6981	26.9904	31.779	0.975441	-1.44277	0.53357	-0.0115627	0.0593692	1.74564	-0.673753	1.11018	0.185741	0.726032	1	0	0	0	0
DDB0232432_4032949	DDB_G0290397	100	1	144.438	1	1	1	1	2.15968	0	0	0	0	3.12703	1.35449	0.477188	0.202026	0.654087	1	0	0	0	0
DDB0232432_4270901	DDB_G0290557	100	15.972	103.814	1	1	49.4388	29.012	0.812899	-1.20336	-1.20336	0.49071	0.259219	1.55604	-0.337188	-0.950401	0.893125	0.968212	1	0	0	0	0
DDB0232432_4423839	no_geneID	100	23.6883	219.094	1	36.8698	105.17	96.4942	0.966096	-1.37453	0.192137	0.647356	0.609967	1.73474	-0.577826	0.705127	1.11374	1.39325	1	0	0	0	0
DDB0232432_4528351	DDB_G0290737	100	5.38949	130.549	1	1	22.5583	1	1.38422	-0.731548	-0.731548	0.621758	-0.731548	2.22248	0.32608	-0.390675	1.07769	-0.232412	1	0	0	0	0
DDB0232432_4606636	DDB_G0290779	100	12.3718	115.477	1	1	9.73927	47.3071	0.970061	-1.09243	-1.09243	-0.103907	0.582493	1.73937	-0.18125	-0.818806	0.0556869	1.35996	1	0	0	0	0
DDB0232432_4940094	DDB_G0291065	100	24.9571	269.95	1	168.626	102.501	1	1.03409	-1.39719	0.82973	0.613533	-1.39719	1.81405	-0.609682	1.46153	1.0661	-1.03905	1	0	0	0	0
DDB0232432_4970421	DDB_G0291109	100	1.00598	101.573	1	41.5311	1	1	2.00419	-0.00258781	1.61579	-0.00258781	-0.00258781	2.94565	1.35085	2.39405	0.198381	0.650951	1	0	0	0	0
DDB0232433_153339	DDB_G0291229	100	38.5041	257.557	1	43.1432	47.1658	25.3292	0.825366	-1.58551	0.0494047	0.0881194	-0.181887	1.57058	-0.874411	0.535798	0.32613	0.433675	1	0	0	0	0
DDB0232433_479292	DDB_G0291524	100	10.8496	250.606	1	31.8496	19.2945	1	1.36358	-1.03541	0.46769	0.250021	-1.03541	2.19839	-0.101092	1.03203	0.554147	-0.60064	1	0	0	0	0
DDB0232433_621174	DDB_G0295709	100	33.5943	197.917	1	1	127.763	16.5129	0.770216	-1.52627	-1.52627	0.58014	-0.308444	1.50625	-0.791129	-1.33348	1.01908	0.280312	1	0	0	0	0
DDB0232433_897224	DDB_G0291964	100	10.8816	133.158	1	37.6711	20.0727	1	1.08767	-1.03669	0.539314	0.265911	-1.03669	1.87656	-0.102893	1.117	0.576526	-0.602193	1	0	0	0	0
DDB0232433_1177678	DDB_G0292096	100	64.1257	11.5627	171.243	1	58.1427	80.8132	-0.743974	0.426581	-1.80703	-0.0425365	0.100451	-0.26001	1.95417	-1.66656	0.142119	0.775815	0	1	0	0	0
DDB0232433_1250533	no_geneID	100	18.5759	158.331	1	18.0189	41.5967	1	0.930615	-1.26895	-0.0132217	0.350109	-1.26895	1.69335	-0.429396	0.461502	0.695107	-0.883642	1	0	0	0	0
DDB0232433_1645604	DDB_G0292550	100	25.2317	257.833	127.175	79.812	1	1	1.00939	0.702455	0.500121	-1.40195	-1.40195	1.78524	2.34199	1.0705	-1.77243	-1.04481	1	1	0	0	0
DDB0232433_1927567	DDB_G0292672	100	22.4441	162.368	1	1	6.887	1	0.859398	-1.3511	-1.3511	-0.513071	-1.3511	1.61028	-0.544884	-1.12567	-0.520566	-0.983195	1	0	0	0	0
DDB0232433_2103568	DDB_G0292824	100	1	112.296	1	2.82564	1	1	2.05036	0	0.451116	0	0	2.99951	1.35449	1.01236	0.202026	0.654087	1	0	0	0	0
DDB0232433_2223242	no_geneID	100	1	118.723	1	1	1	1	2.07453	0	0	0	0	3.0277	1.35449	0.477188	0.202026	0.654087	1	0	0	0	0
DDB0232433_2365102	DDB_G0293140	100	27.9021	163.742	1	1	88.6565	18.0063	0.768523	-1.44564	-1.44564	0.502074	-0.190212	1.50428	-0.677781	-1.23782	0.90913	0.423586	1	0	0	0	0
DDB0232433_2613273	DDB_G0293258	100	11.936	150.259	168.619	42.6732	76.254	35.0707	1.09998	1.15005	0.553295	0.805403	0.468085	1.89091	2.97121	1.13358	1.33633	1.22132	1	1	0	0	0
DDB0232433_3098124	DDB_G0293590	100	3.16699	204.264	1	1	27.8803	1	1.80955	-0.500646	-0.500646	0.944652	-0.500646	2.7186	0.65068	-0.116747	1.53244	0.0473979	1	0	0	0	0
DDB0232433_3193330	DDB_G0293528	100	1	141.263	1	54.5955	1	1	2.15003	0	1.73716	0	0	3.11577	1.35449	2.53804	0.202026	0.654087	1	0	0	0	0
DDB0232428_85261	no_geneID	10000	3343.31	12119.7	307.88	7904.57	1046.19	565.766	0.559315	-1.03579	0.373702	-0.504564	-0.771539	1.2826	1.56221	1.03753	-0.925029	-0.247009	0	1	0	0	0
DDB0232428_423298	no_geneID	10000	1559.39	761.399	182.597	1208.06	1613.53	1635.35	-0.311343	-0.931463	-0.110866	0.0148226	0.0206546	0.20451	1.71787	0.382541	0.496762	0.770588	0	1	0	0	0
DDB0232428_1566602	DDB_G0268578	1000	134.129	74.5857	145.538	35.9988	181.158	161.305	-0.254869	0.0354535	-0.571236	0.130534	0.0801247	0.274438	3.16043	-0.239739	0.813516	0.84698	0	1	0	0	0
DDB0232428_1853651	DDB_G0269046	1000	134.325	763.212	156.854	34.8462	184.585	404.933	0.754488	0.0673392	-0.586001	0.138038	0.479226	1.52427	3.208	-0.259698	0.834058	1.35964	1	1	0	0	0
DDB0232428_2861962	DDB_G0269486	1000	127.516	1271.82	479.937	156.848	228.427	269.353	0.99886	0.57562	0.0899151	0.253184	0.324757	1.82686	3.96632	0.653936	1.14926	1.16122	1	1	0	0	0
DDB0232428_3171960	DDB_G0269624	1000	124.661	252.123	275.966	268.323	261.77	290.547	0.305881	0.345125	0.332927	0.322188	0.367485	0.968786	3.62244	0.982414	1.33816	1.2161	0	1	0	0	0
DDB0232428_3182265	DDB_G0270586	1000	241.308	1270.51	978.159	566.289	284.772	158.106	0.721405	0.607838	0.370467	0.0719255	-0.183623	1.48331	4.01438	1.03316	0.653078	0.508187	0	1	0	0	0
DDB0232428_3519355	DDB_G0270942	1000	949.885	487.41	142.03	603.656	886.931	465.375	-0.289776	-0.82529	-0.196882	-0.0297815	-0.309868	0.231214	1.87627	0.266274	0.374661	0.346022	0	1	0	0	0
DDB0232428_3521811	DDB_G0269768	1000	407.309	1531.24	470.537	2139.26	278.209	780.376	0.575118	0.0626697	0.720339	-0.165552	0.28238	1.30217	3.20103	1.50608	0.00299618	1.10678	0	1	0	0	0
DDB0232428_3764029	DDB_G0269864	1000	405.069	227.68	206.606	170.618	611.92	141.346	-0.250203	-0.292386	-0.375503	0.179166	-0.457244	0.280216	2.67132	0.0248317	0.946643	0.156713	0	1	0	0	0
DDB0232428_4807684	no_geneID	1000	404.117	420.464	140.05	96.0879	336.908	238.43	0.0172218	-0.460224	-0.623839	-0.0789956	-0.229147	0.611354	2.42092	-0.310842	0.23994	0.449711	0	1	0	0	0
DDB0232429_616254	no_geneID	10000	1288.69	1452.43	147.137	925.271	1174.74	755.611	0.0519486	-0.942427	-0.143878	-0.0402062	-0.231849	0.654354	1.70151	0.337918	0.346123	0.44624	0	1	0	0	0
DDB0232429_859832	no_geneID	1000	345.179	183.398	122.899	191.992	106.472	12.4474	-0.274649	-0.448497	-0.254762	-0.510811	-1.44297	0.249946	2.43841	0.188037	-0.942131	-1.10948	0	1	0	0	0
DDB0232429_1165385	DDB_G0272002	1000	248.591	237.139	103.243	291.335	53.2771	2.15936	-0.0204817	-0.381627	0.0689078	-0.668945	-2.06116	0.564668	2.53818	0.62554	-1.37501	-1.90357	0	1	0	0	0
DDB0232429_1662744	DDB_G0272206	1000	257.989	493.138	120.863	142.387	218.84	75.6692	0.281368	-0.329309	-0.25813	-0.0714736	-0.532682	0.938432	2.61623	0.183484	0.260531	0.0598113	0	1	0	0	0
DDB0232429_1746526	DDB_G0272474	1000	143.821	771.564	489.406	473.978	30.215	57.6651	0.729549	0.531846	0.517935	-0.677601	-0.39691	1.49339	3.90101	1.23249	-1.39871	0.234214	0	1	0	0	0
DDB0232429_2152175	DDB_G0273009	1000	478.862	605.988	103.134	560.457	385.671	422.919	0.102253	-0.66681	0.068332	-0.0939932	-0.0539537	0.716644	2.11271	0.624762	0.198885	0.674752	0	1	0	0	0
DDB0232429_3242592	DDB_G0273657	1000	156.632	206.615	104.674	34.0556	55.1062	26.718	0.12028	-0.175041	-0.662693	-0.453681	-0.768078	0.738966	2.84639	-0.363361	-0.785741	-0.242563	0	1	0	0	0
DDB0232429_3410648	DDB_G0273795	10000	1296.7	1525.1	135.94	583.381	1012.09	478.77	0.0704596	-0.979492	-0.346887	-0.107619	-0.432712	0.677275	1.64621	0.0635118	0.161586	0.188225	0	1	0	0	0
DDB0232429_3430705	no_geneID	1000	229.199	47.4092	258.374	109.213	113.109	229.577	-0.684349	0.0520367	-0.321938	-0.306716	0.000715373	-0.257365	3.18517	0.0972355	-0.383433	0.744976	0	1	0	0	0
DDB0232429_4497116	DDB_G0274651	1000	671.816	415.755	123.138	272.16	527.158	734.05	-0.208412	-0.736858	-0.392425	-0.105309	0.0384755	0.331963	2.0082	0.00195854	0.167907	0.79348	0	1	0	0	0
DDB0232429_4515717	DDB_G0274923	1000	535.297	843.357	143.635	385.507	660.472	1188.08	0.197417	-0.571334	-0.142562	0.0912598	0.346251	0.83448	2.25515	0.339698	0.706004	1.18883	0	1	0	0	0
DDB0232429_5119380	DDB_G0275071	1000	132.08	425.538	2738.1	28.3885	111.205	350.59	0.508101	1.31661	-0.667695	-0.0747124	0.423962	1.21918	5.07182	-0.370122	0.251665	1.28865	0	1	0	0	0
DDB0232429_7004399	no_geneID	1000	249.293	335.286	137.748	203.283	382.527	51.0745	0.128705	-0.257627	-0.0886106	0.185951	-0.688507	0.749397	2.72318	0.412623	0.965216	-0.140351	0	1	0	0	0
DDB0232429_7903431	DDB_G0277141	1000	535.292	426.679	138.123	348.029	411.007	549.669	-0.0984897	-0.588325	-0.186976	-0.114742	0.0115103	0.468074	2.2298	0.279664	0.142087	0.758842	0	1	0	0	0
DDB0232430_703881	DDB_G0278663	1000	136.103	485.02	208.007	21.1068	181.876	397.277	0.551891	0.184209	-0.809446	0.125907	0.465225	1.27341	3.38236	-0.561726	0.800849	1.34165	0	1	0	0	0
DDB0232430_1006669	DDB_G0277843	1000	243.378	478.15	170.962	100.449	214.28	360.963	0.293282	-0.153383	-0.384337	-0.0552995	0.171181	0.953185	2.8787	0.0128907	0.304806	0.963944	0	1	0	0	0
DDB0232430_1252001	DDB_G0278945	1000	179.758	350.858	287.239	72.8807	105.339	101.044	0.290443	0.203555	-0.392076	-0.232099	-0.250178	0.949669	3.41122	0.00243059	-0.179174	0.422696	0	1	0	0	0
DDB0232430_1252700	DDB_G0278945	10000	1253.78	2533.27	1300.82	149.575	1754.29	2507.37	0.305459	0.0159931	-0.923363	0.145878	0.300995	0.968263	3.1314	-0.715708	0.85552	1.13069	0	1	0	0	0
DDB0232430_3196910	DDB_G0280389	1000	315.818	539.277	485.056	54.9473	147.039	21.2893	0.232375	0.186355	-0.759491	-0.332003	-1.17128	0.877767	3.38556	-0.494202	-0.452654	-0.760482	0	1	0	0	0
DDB0232430_3535532	DDB_G0280589	1000	199.247	156.423	170.554	100.878	301.661	331.859	-0.10509	-0.0675281	-0.295594	0.180129	0.221562	0.459902	3.00679	0.132844	0.949277	1.02866	0	1	0	0	0
DDB0232430_4106731	DDB_G0281151	1000	672.888	364.838	553.806	140.661	243.493	201.34	-0.265843	-0.0845853	-0.679768	-0.441456	-0.524013	0.26085	2.98134	-0.386442	-0.752277	0.0709466	0	1	0	0	0
DDB0232430_4518217	no_geneID	1000	539.008	393.478	100.262	390.822	483.832	219.777	-0.136675	-0.730461	-0.139617	-0.0469008	-0.389614	0.420792	2.01775	0.343678	0.327797	0.243586	0	1	0	0	0
DDB0232430_4570743	no_geneID	10000	1628.25	1478.77	191.571	2112.89	1601	1663.86	-0.0418182	-0.929391	0.113157	-0.0073277	0.00939586	0.538248	1.72096	0.685352	0.436126	0.756126	0	1	0	0	0
DDB0232430_5200378	DDB_G0281971	1000	120.177	493.145	277.109	735.379	117.778	195.888	0.613155	0.36283	0.786691	-0.00875468	0.212187	1.34927	3.64885	1.59577	0.43222	1.01662	0	1	0	0	0
DDB0232431_163444	DDB_G0283015	1000	359.088	681.843	212.919	268.321	5.63449	103.381	0.278483	-0.226987	-0.126547	-1.80435	-0.540761	0.93486	2.76889	0.361345	-4.48311	0.0494336	0	1	0	0	0
DDB0232431_346549	DDB_G0283247	1000	188.776	104.3	105.989	129.595	437.763	10.5392	-0.257661	-0.250686	-0.163359	0.365292	-1.25314	0.270981	2.73353	0.311586	1.45615	-0.86564	0	1	0	0	0
DDB0232431_519227	DDB_G0283341	1000	920.861	1215.45	230.699	798.888	1071.59	210.808	0.120543	-0.601148	-0.0617083	0.0658334	-0.640308	0.739291	2.21067	0.448987	0.636401	-0.0784375	0	1	0	0	0
DDB0232431_1167464	DDB_G0283885	1000	199.162	534.32	935.9	356.219	157.399	110.599	0.428596	0.672024	0.252511	-0.102205	-0.255455	1.12074	4.11014	0.873717	0.176406	0.415917	0	1	0	0	0
DDB0232431_1399282	DDB_G0284007	1000	231.998	79.4187	140.365	166.064	61.2812	41.1544	-0.465561	-0.218226	-0.145207	-0.578156	-0.751067	0.0135493	2.78196	0.336122	-1.12649	-0.220712	0	1	0	0	0
DDB0232431_1671044	DDB_G0284191	1000	425.669	386.501	250.652	751.459	688.932	348.988	-0.0419212	-0.230002	0.246833	0.209104	-0.0862616	0.53812	2.76439	0.866041	1.0286	0.633251	0	1	0	0	0
DDB0232431_1844853	DDB_G0284295	1000	112.94	123.802	413.767	174.607	256.436	124.263	0.0398777	0.563906	0.189212	0.35613	0.0414938	0.639407	3.94884	0.788155	1.43107	0.797357	0	1	0	0	0
DDB0232431_1844857	DDB_G0284295	1000	383.429	1475.73	1924.95	1553.09	916.21	1099.22	0.585321	0.700733	0.607512	0.37831	0.457399	1.3148	4.15298	1.35357	1.49179	1.3316	0	1	0	0	0
DDB0232431_2050662	DDB_G0284497	1000	201.602	225.651	154.906	121.755	256.567	144.263	0.0489439	-0.114425	-0.219006	0.104706	-0.145339	0.650634	2.93682	0.236369	0.742812	0.557364	0	1	0	0	0
DDB0232431_2633035	DDB_G0285055	10000	1127.15	1391.24	139.521	1046.88	372.905	447.622	0.0914187	-0.907343	-0.0320855	-0.480385	-0.401072	0.703228	1.75385	0.489028	-0.858841	0.228868	0	1	0	0	0
DDB0232431_3822777	DDB_G0285915	1000	868.267	4959.94	553.221	659.223	1411.82	1828.23	0.756824	-0.195754	-0.119621	0.211126	0.323377	1.52716	2.81549	0.370707	1.03413	1.15945	1	1	0	0	0
DDB0232431_4790387	DDB_G0286649	1000	257.985	28.0073	191.524	67.5917	138.986	76.0011	-0.964323	-0.129372	-0.581702	-0.268625	-0.530775	-0.604041	2.91452	-0.253885	-0.27916	0.0622602	0	1	0	0	0
DDB0232432_942271	DDB_G0287995	1000	117.146	25.4677	129.347	78.413	48.9996	1	-0.662737	0.043029	-0.174339	-0.378534	-2.06873	-0.230603	3.17173	0.296745	-0.58003	-1.91329	0	1	0	0	0
DDB0232432_1323382	DDB_G0288249	1000	249.79	3168.36	509.356	1297.69	98.2473	1	1.10326	0.309446	0.715596	-0.405255	-2.39758	1.95614	3.56921	1.49967	-0.653177	-2.3357	1	1	0	0	0
DDB0232432_1384902	DDB_G0288321	1000	208.696	73.657	101.905	80.63	240.191	188.412	-0.4523	-0.31132	-0.413017	0.0610425	-0.0444052	0.0299696	2.64307	-0.0258758	0.623286	0.687017	0	1	0	0	0
DDB0232432_1836979	DDB_G0288695	10000	1331.33	273.08	181.336	1241.76	496.013	268.918	-0.687997	-0.865801	-0.0302488	-0.428793	-0.694667	-0.261881	1.81583	0.491511	-0.717611	-0.148263	0	1	0	0	0
DDB0232432_1973912	DDB_G0288793	1000	194.62	86.0966	137.283	81.3892	83.4068	21.7399	-0.354201	-0.151568	-0.37862	-0.367985	-0.95193	0.151441	2.88141	0.020619	-0.551153	-0.478726	0	1	0	0	0
DDB0232432_4812213	DDB_G0290961	1000	601.346	579.898	178.942	660.257	286.316	345.785	-0.0157725	-0.526412	0.0405884	-0.322278	-0.240318	0.570499	2.32217	0.587261	-0.426033	0.435361	0	1	0	0	0
DDB0232432_4962097	DDB_G0291079	10000	1966.71	5219.12	297.882	6490.45	3095.02	4500.18	0.423858	-0.819695	0.518535	0.196924	0.35949	1.11487	1.88462	1.2333	0.995255	1.20583	0	1	0	0	0
DDB0232433_28784	no_geneID	1000	637.957	706.565	104.228	665.402	569.554	199.482	0.0443609	-0.786805	0.0182927	-0.0492566	-0.504887	0.644959	1.93369	0.557124	0.321348	0.0955137	0	1	0	0	0
DDB0232433_147515	DDB_G0291229	1000	177.19	572.514	580.97	134.553	161.072	230.709	0.509346	0.515714	-0.119548	-0.0414191	0.114625	1.22073	3.87694	0.370806	0.342803	0.891296	0	1	0	0	0
DDB0232433_170479	DDB_G0291354	1000	607.731	1228.04	171.051	628.685	424.95	395.466	0.305501	-0.550587	0.0147219	-0.155374	-0.186603	0.968315	2.2861	0.552297	0.0308582	0.50436	0	1	0	0	0
DDB0232433_879373	DDB_G0291884	1000	722.696	340.311	158.1	198.885	572.317	28.5487	-0.327079	-0.660024	-0.560354	-0.101319	-1.40337	0.185024	2.12283	-0.225029	0.17883	-1.05861	0	1	0	0	0
DDB0232433_894117	DDB_G0291964	1000	993.949	1615.92	203.157	1760.55	1286.17	2833.37	0.211055	-0.689533	0.248285	0.111935	0.45494	0.851367	2.07881	0.868004	0.762601	1.32844	0	1	0	0	0
DDB0232433_897382	DDB_G0291964	1000	739.508	1515.11	152.232	83.8872	846.423	764.828	0.311501	-0.686438	-0.945247	0.0586443	0.014621	0.975744	2.08342	-0.745289	0.616721	0.762838	0	1	0	0	0
DDB0232433_1494543	no_geneID	1000	708.078	317.859	169.741	469.521	759.68	381.539	-0.347847	-0.620295	-0.178426	0.0305493	-0.268542	0.159309	2.18211	0.29122	0.539813	0.399106	0	1	0	0	0
DDB0232433_1733549	DDB_G0292488	1000	745.238	309.724	134.152	611.766	501.962	412.185	-0.381321	-0.744697	-0.0857099	-0.171624	-0.257203	0.11786	1.99651	0.416544	-0.0136259	0.413672	0	1	0	0	0
DDB0232433_2084082	DDB_G0292796	1000	444.703	1243.35	727.23	454.164	284.864	258.752	0.446524	0.213601	0.00914265	-0.193432	-0.235187	1.14294	3.42621	0.544756	-0.0733244	0.441952	0	1	0	0	0
DDB0232433_2140723	DDB_G0292962	10000	1015.03	1458.2	171.595	781.995	1322.08	1645.16	0.157337	-0.771974	-0.113275	0.114778	0.20973	0.784851	1.95581	0.379284	0.770384	1.01346	0	1	0	0	0
DDB0232433_2840202	no_geneID	10000	2112.66	1885.92	335.507	646.645	2665.43	3648.48	-0.0493054	-0.799128	-0.514163	0.100937	0.237282	0.528977	1.9153	-0.162594	0.732496	1.04885	0	1	0	0	0
DDB0232433_2916684	DDB_G0293466	10000	1307.94	1675.21	118.018	1346.14	1298.26	413.449	0.107483	-1.04464	0.0125043	-0.003225	-0.500165	0.72312	1.54902	0.5493	0.447357	0.10158	0	1	0	0	0
DDB0232433_3177480	DDB_G0293630	10000	7661.71	4247.03	700.785	2550.43	6193.25	4951.02	-0.256241	-1.03874	-0.477713	-0.0924075	-0.189631	0.27274	1.55782	-0.113324	0.203225	0.50047	0	1	0	0	0
DDB0232433_3312784	DDB_G0295373	10000	1500.43	1352.91	188.595	1478.19	1397.15	1102.35	-0.0449443	-0.900685	-0.00648373	-0.0309723	-0.133897	0.534377	1.76379	0.523634	0.371401	0.572062	0	1	0	0	0

## Sheet: Genes_binned_by_expression_TPM
geneId	mean	sample
DDB_G0290943	0.00419624	Bin_1_Lowest_expression
DDB_G0290703	0.00496907	Bin_1_Lowest_expression
DDB_G0276829	0.00727309	Bin_1_Lowest_expression
DDB_G0291684	0.00769492	Bin_1_Lowest_expression
DDB_G0275077	0.00784789	Bin_1_Lowest_expression
DDB_G0291940	0.00897015	Bin_1_Lowest_expression
DDB_G0278977	0.00920935	Bin_1_Lowest_expression
DDB_G0291668	0.00926607	Bin_1_Lowest_expression
DDB_G0278451	0.00979718	Bin_1_Lowest_expression
DDB_G0267342	0.0102995	Bin_1_Lowest_expression
DDB_G0288955	0.0111885	Bin_1_Lowest_expression
DDB_G0295727	0.0116085	Bin_1_Lowest_expression
DDB_G0282059	0.0119706	Bin_1_Lowest_expression
DDB_G0293630	0.0120647	Bin_1_Lowest_expression
DDB_G0279431	0.0120752	Bin_1_Lowest_expression
DDB_G0286877	0.0122886	Bin_1_Lowest_expression
DDB_G0274363	0.0124227	Bin_1_Lowest_expression
DDB_G0274063	0.0132572	Bin_1_Lowest_expression
DDB_G0271662	0.0133351	Bin_1_Lowest_expression
DDB_G0268944	0.013464	Bin_1_Lowest_expression
DDB_G0272334	0.0136208	Bin_1_Lowest_expression
DDB_G0291604	0.0136773	Bin_1_Lowest_expression
DDB_G0270762	0.0138637	Bin_1_Lowest_expression
DDB_G0286547	0.0140068	Bin_1_Lowest_expression
DDB_G0286823	0.0140768	Bin_1_Lowest_expression
DDB_G0286825	0.0149502	Bin_1_Lowest_expression
DDB_G0281407	0.0152249	Bin_1_Lowest_expression
DDB_G0278289	0.0155505	Bin_1_Lowest_expression
DDB_G0272961	0.0156799	Bin_1_Lowest_expression
DDB_G0285665	0.0159293	Bin_1_Lowest_expression
DDB_G0289865	0.0160628	Bin_1_Lowest_expression
DDB_G0293352	0.0160792	Bin_1_Lowest_expression
DDB_G0289433	0.0165967	Bin_1_Lowest_expression
DDB_G0284933	0.0166962	Bin_1_Lowest_expression
DDB_G0274541	0.0168532	Bin_1_Lowest_expression
DDB_G0267250	0.0169082	Bin_1_Lowest_expression
DDB_G0271302	0.016929	Bin_1_Lowest_expression
DDB_G0295749	0.0175304	Bin_1_Lowest_expression
DDB_G0268314	0.0176497	Bin_1_Lowest_expression
DDB_G0289517	0.0178861	Bin_1_Lowest_expression
DDB_G0292912	0.0179558	Bin_1_Lowest_expression
DDB_G0286129	0.0180105	Bin_1_Lowest_expression
DDB_G0270952	0.018034	Bin_1_Lowest_expression
DDB_G0276981	0.0181028	Bin_1_Lowest_expression
DDB_G0283233	0.0187614	Bin_1_Lowest_expression
DDB_G0284239	0.018863	Bin_1_Lowest_expression
DDB_G0292098	0.0190672	Bin_1_Lowest_expression
DDB_G0291017	0.019133	Bin_1_Lowest_expression
DDB_G0281443	0.0192575	Bin_1_Lowest_expression
DDB_G0267188	0.0192664	Bin_1_Lowest_expression
DDB_G0288283	0.0194381	Bin_1_Lowest_expression
DDB_G0292848	0.0196569	Bin_1_Lowest_expression
DDB_G0279719	0.0198609	Bin_1_Lowest_expression
DDB_G0274631	0.0199145	Bin_1_Lowest_expression
DDB_G0271556	0.0202474	Bin_1_Lowest_expression
DDB_G0280709	0.0205464	Bin_1_Lowest_expression
DDB_G0270792	0.0208671	Bin_1_Lowest_expression
DDB_G0284983	0.021348	Bin_1_Lowest_expression
DDB_G0267280	0.0214406	Bin_1_Lowest_expression
DDB_G0288709	0.021534	Bin_1_Lowest_expression
DDB_G0291454	0.0215497	Bin_1_Lowest_expression
DDB_G0270162	0.0216337	Bin_1_Lowest_expression
DDB_G0271590	0.0225474	Bin_1_Lowest_expression
DDB_G0293846	0.0226769	Bin_1_Lowest_expression
DDB_G0274533	0.0226831	Bin_1_Lowest_expression
DDB_G0277771	0.0226955	Bin_1_Lowest_expression
DDB_G0275893	0.0232022	Bin_1_Lowest_expression
DDB_G0293744	0.0236182	Bin_1_Lowest_expression
DDB_G0282555	0.0236407	Bin_1_Lowest_expression
DDB_G0276095	0.0237627	Bin_1_Lowest_expression
DDB_G0283373	0.0237763	Bin_1_Lowest_expression
DDB_G0279127	0.0240869	Bin_1_Lowest_expression
DDB_G0270582	0.0242493	Bin_1_Lowest_expression
DDB_G0283191	0.0244496	Bin_1_Lowest_expression
DDB_G0281631	0.0245568	Bin_1_Lowest_expression
DDB_G0268184	0.0246386	Bin_1_Lowest_expression
DDB_G0291702	0.0246621	Bin_1_Lowest_expression
DDB_G0274617	0.0248008	Bin_1_Lowest_expression
DDB_G0286625	0.0248603	Bin_1_Lowest_expression
DDB_G0284683	0.0250158	Bin_1_Lowest_expression
DDB_G0286503	0.0252696	Bin_1_Lowest_expression
DDB_G0271876	0.0255973	Bin_1_Lowest_expression
DDB_G0271994	0.025629	Bin_1_Lowest_expression
DDB_G0285959	0.0256398	Bin_1_Lowest_expression
DDB_G0289747	0.0257884	Bin_1_Lowest_expression
DDB_G0284885	0.026196	Bin_1_Lowest_expression
DDB_G0291958	0.0263184	Bin_1_Lowest_expression
DDB_G0288269	0.0266538	Bin_1_Lowest_expression
DDB_G0286417	0.026702	Bin_1_Lowest_expression
DDB_G0284569	0.0268066	Bin_1_Lowest_expression
DDB_G0267780	0.0270058	Bin_1_Lowest_expression
DDB_G0269402	0.0271395	Bin_1_Lowest_expression
DDB_G0292374	0.0273042	Bin_1_Lowest_expression
DDB_G0272240	0.027518	Bin_1_Lowest_expression
DDB_G0267506	0.0275836	Bin_1_Lowest_expression
DDB_G0275943	0.0276747	Bin_1_Lowest_expression
DDB_G0271594	0.0277063	Bin_1_Lowest_expression
DDB_G0293164	0.027739	Bin_1_Lowest_expression
DDB_G0278069	0.0278124	Bin_1_Lowest_expression
DDB_G0275223	0.0279259	Bin_1_Lowest_expression
DDB_G0286435	0.0280401	Bin_1_Lowest_expression
DDB_G0285807	0.0281154	Bin_1_Lowest_expression
DDB_G0277475	0.0282303	Bin_1_Lowest_expression
DDB_G0286851	0.0283171	Bin_1_Lowest_expression
DDB_G0287503	0.0283348	Bin_1_Lowest_expression
DDB_G0270532	0.0284239	Bin_1_Lowest_expression
DDB_G0268602	0.0285217	Bin_1_Lowest_expression
DDB_G0285059	0.02864	Bin_1_Lowest_expression
DDB_G0268272	0.0286496	Bin_1_Lowest_expression
DDB_G0290895	0.0287792	Bin_1_Lowest_expression
DDB_G0273823	0.0288996	Bin_1_Lowest_expression
DDB_G0280521	0.029123	Bin_1_Lowest_expression
DDB_G0281417	0.0291854	Bin_1_Lowest_expression
DDB_G0281485	0.0291862	Bin_1_Lowest_expression
DDB_G0267550	0.0295171	Bin_1_Lowest_expression
DDB_G0274651	0.029987	Bin_1_Lowest_expression
DDB_G0270504	0.0300305	Bin_1_Lowest_expression
DDB_G0290273	0.030273	Bin_1_Lowest_expression
DDB_G0291880	0.0302939	Bin_1_Lowest_expression
DDB_G0271468	0.0303272	Bin_1_Lowest_expression
DDB_G0290313	0.0305066	Bin_1_Lowest_expression
DDB_G0288561	0.030517	Bin_1_Lowest_expression
DDB_G0281805	0.030538	Bin_1_Lowest_expression
DDB_G0272288	0.0305395	Bin_1_Lowest_expression
DDB_G0274807	0.0305537	Bin_1_Lowest_expression
DDB_G0270638	0.0306298	Bin_1_Lowest_expression
DDB_G0285139	0.0308397	Bin_1_Lowest_expression
DDB_G0272276	0.0311127	Bin_1_Lowest_expression
DDB_G0280523	0.0311829	Bin_1_Lowest_expression
DDB_G0286227	0.0311829	Bin_1_Lowest_expression
DDB_G0271098	0.0316352	Bin_1_Lowest_expression
DDB_G0268812	0.0316593	Bin_1_Lowest_expression
DDB_G0277641	0.0319604	Bin_1_Lowest_expression
DDB_G0293664	0.0321458	Bin_1_Lowest_expression
DDB_G0267210	0.032478	Bin_1_Lowest_expression
DDB_G0268528	0.0329471	Bin_1_Lowest_expression
DDB_G0281535	0.0329712	Bin_1_Lowest_expression
DDB_G0268390	0.0329953	Bin_1_Lowest_expression
DDB_G0288905	0.0330021	Bin_1_Lowest_expression
DDB_G0283143	0.0331522	Bin_1_Lowest_expression
DDB_G0267934	0.0332053	Bin_1_Lowest_expression
DDB_G0293200	0.0332868	Bin_1_Lowest_expression
DDB_G0277655	0.0335018	Bin_1_Lowest_expression
DDB_G0285753	0.0335035	Bin_1_Lowest_expression
DDB_G0288179	0.0337476	Bin_1_Lowest_expression
DDB_G0293594	0.0338579	Bin_1_Lowest_expression
DDB_G0293550	0.0339968	Bin_1_Lowest_expression
DDB_G0271598	0.0341283	Bin_1_Lowest_expression
DDB_G0267348	0.0341931	Bin_1_Lowest_expression
DDB_G0286587	0.0342214	Bin_1_Lowest_expression
DDB_G0275289	0.0345378	Bin_1_Lowest_expression
DDB_G0292834	0.0346811	Bin_1_Lowest_expression
DDB_G0291682	0.0352399	Bin_1_Lowest_expression
DDB_G0268250	0.03533	Bin_1_Lowest_expression
DDB_G0291530	0.0355116	Bin_1_Lowest_expression
DDB_G0288363	0.0356632	Bin_1_Lowest_expression
DDB_G0278091	0.0357259	Bin_1_Lowest_expression
DDB_G0293440	0.035974	Bin_1_Lowest_expression
DDB_G0284393	0.0366528	Bin_1_Lowest_expression
DDB_G0278235	0.036727	Bin_1_Lowest_expression
DDB_G0281039	0.0367394	Bin_1_Lowest_expression
DDB_G0270476	0.036744	Bin_1_Lowest_expression
DDB_G0279337	0.0368374	Bin_1_Lowest_expression
DDB_G0278679	0.0370887	Bin_1_Lowest_expression
DDB_G0276287	0.0371012	Bin_1_Lowest_expression
DDB_G0268464	0.0371401	Bin_1_Lowest_expression
DDB_G0269008	0.0372011	Bin_1_Lowest_expression
DDB_G0286157	0.037286	Bin_1_Lowest_expression
DDB_G0289777	0.0374635	Bin_1_Lowest_expression
DDB_G0287101	0.0376575	Bin_1_Lowest_expression
DDB_G0270628	0.0377863	Bin_1_Lowest_expression
DDB_G0286595	0.0381945	Bin_1_Lowest_expression
DDB_G0276323	0.0383723	Bin_1_Lowest_expression
DDB_G0274675	0.0385346	Bin_1_Lowest_expression
DDB_G0275003	0.0386209	Bin_1_Lowest_expression
DDB_G0289043	0.0386741	Bin_1_Lowest_expression
DDB_G0277263	0.0388034	Bin_1_Lowest_expression
DDB_G0293010	0.0390963	Bin_1_Lowest_expression
DDB_G0291514	0.0391597	Bin_1_Lowest_expression
DDB_G0275987	0.0393562	Bin_1_Lowest_expression
DDB_G0267240	0.039385	Bin_1_Lowest_expression
DDB_G0277067	0.0394686	Bin_1_Lowest_expression
DDB_G0273005	0.0399442	Bin_1_Lowest_expression
DDB_G0284665	0.040002	Bin_1_Lowest_expression
DDB_G0275691	0.0402694	Bin_1_Lowest_expression
DDB_G0270650	0.0402741	Bin_1_Lowest_expression
DDB_G0279035	0.0402741	Bin_1_Lowest_expression
DDB_G0267206	0.0404931	Bin_1_Lowest_expression
DDB_G0282991	0.0406295	Bin_1_Lowest_expression
DDB_G0276245	0.0407694	Bin_1_Lowest_expression
DDB_G0281643	0.0409358	Bin_1_Lowest_expression
DDB_G0282667	0.0410197	Bin_1_Lowest_expression
DDB_G0273735	0.0411825	Bin_1_Lowest_expression
DDB_G0286113	0.0414007	Bin_1_Lowest_expression
DDB_G0267474	0.0415882	Bin_1_Lowest_expression
DDB_G0277521	0.0417156	Bin_1_Lowest_expression
DDB_G0269662	0.0418607	Bin_1_Lowest_expression
DDB_G0288695	0.041975	Bin_1_Lowest_expression
DDB_G0279671	0.0420892	Bin_1_Lowest_expression
DDB_G0272674	0.0421861	Bin_1_Lowest_expression
DDB_G0289853	0.042187	Bin_1_Lowest_expression
DDB_G0279651	0.0423605	Bin_1_Lowest_expression
DDB_G0294344	0.0424819	Bin_1_Lowest_expression
DDB_G0290107	0.0426577	Bin_1_Lowest_expression
DDB_G0281467	0.0426653	Bin_1_Lowest_expression
DDB_G0270286	0.0427679	Bin_1_Lowest_expression
DDB_G0278585	0.0430975	Bin_1_Lowest_expression
DDB_G0294585	0.0431133	Bin_1_Lowest_expression
DDB_G0293288	0.0432004	Bin_1_Lowest_expression
DDB_G0282355	0.0434066	Bin_1_Lowest_expression
DDB_G0269004	0.043408	Bin_1_Lowest_expression
DDB_G0274287	0.0434403	Bin_1_Lowest_expression
DDB_G0281917	0.0434403	Bin_1_Lowest_expression
DDB_G0270998	0.0436692	Bin_1_Lowest_expression
DDB_G0286025	0.0439479	Bin_1_Lowest_expression
DDB_G0284981	0.0440279	Bin_1_Lowest_expression
DDB_G0293666	0.0441343	Bin_1_Lowest_expression
DDB_G0282385	0.0443532	Bin_1_Lowest_expression
DDB_G0278489	0.0445407	Bin_1_Lowest_expression
DDB_G0267282	0.0445614	Bin_1_Lowest_expression
DDB_G0287151	0.0445614	Bin_1_Lowest_expression
DDB_G0290887	0.0446573	Bin_1_Lowest_expression
DDB_G0284131	0.0447245	Bin_1_Lowest_expression
DDB_G0275551	0.0450457	Bin_1_Lowest_expression
DDB_G0295701	0.045133	Bin_1_Lowest_expression
DDB_G0286281	0.0452363	Bin_1_Lowest_expression
DDB_G0276211	0.0454409	Bin_1_Lowest_expression
DDB_G0281201	0.0459956	Bin_1_Lowest_expression
DDB_G0275961	0.0460798	Bin_1_Lowest_expression
DDB_G0294328	0.0463558	Bin_1_Lowest_expression
DDB_G0276143	0.0463692	Bin_1_Lowest_expression
DDB_G0268010	0.0465641	Bin_1_Lowest_expression
DDB_G0292274	0.0468381	Bin_1_Lowest_expression
DDB_G0281127	0.0473083	Bin_1_Lowest_expression
DDB_G0288687	0.0474709	Bin_1_Lowest_expression
DDB_G0294302	0.0474818	Bin_1_Lowest_expression
DDB_G0276219	0.0476894	Bin_1_Lowest_expression
DDB_G0294010	0.0477879	Bin_1_Lowest_expression
DDB_G0274119	0.0478385	Bin_1_Lowest_expression
DDB_G0292576	0.0478546	Bin_1_Lowest_expression
DDB_G0273527	0.0480979	Bin_1_Lowest_expression
DDB_G0270672	0.0481121	Bin_1_Lowest_expression
DDB_G0292814	0.0482446	Bin_1_Lowest_expression
DDB_G0277215	0.0486409	Bin_1_Lowest_expression
DDB_G0280723	0.0489044	Bin_1_Lowest_expression
DDB_G0274637	0.0489062	Bin_1_Lowest_expression
DDB_G0278645	0.0489395	Bin_1_Lowest_expression
DDB_G0274481	0.0490054	Bin_1_Lowest_expression
DDB_G0289555	0.0490155	Bin_1_Lowest_expression
DDB_G0279819	0.0490527	Bin_1_Lowest_expression
DDB_G0285723	0.0495174	Bin_1_Lowest_expression
DDB_G0293482	0.0499198	Bin_1_Lowest_expression
DDB_G0281951	0.0502513	Bin_1_Lowest_expression
DDB_G0284373	0.0505151	Bin_1_Lowest_expression
DDB_G0280005	0.0505438	Bin_1_Lowest_expression
DDB_G0273933	0.0505802	Bin_1_Lowest_expression
DDB_G0294372	0.0506008	Bin_1_Lowest_expression
DDB_G0286061	0.0508804	Bin_1_Lowest_expression
DDB_G0292100	0.0510119	Bin_1_Lowest_expression
DDB_G0272692	0.051417	Bin_1_Lowest_expression
DDB_G0270648	0.0516142	Bin_1_Lowest_expression
DDB_G0268856	0.0519046	Bin_1_Lowest_expression
DDB_G0286373	0.0520475	Bin_1_Lowest_expression
DDB_G0284585	0.0524061	Bin_1_Lowest_expression
DDB_G0270224	0.0524769	Bin_1_Lowest_expression
DDB_G0289731	0.0528261	Bin_1_Lowest_expression
DDB_G0278823	0.0529048	Bin_1_Lowest_expression
DDB_G0276339	0.0531881	Bin_1_Lowest_expression
DDB_G0280307	0.0532613	Bin_1_Lowest_expression
DDB_G0292202	0.053336	Bin_1_Lowest_expression
DDB_G0268712	0.0534736	Bin_1_Lowest_expression
DDB_G0280215	0.0534948	Bin_1_Lowest_expression
DDB_G0270090	0.0535427	Bin_1_Lowest_expression
DDB_G0273993	0.0536467	Bin_1_Lowest_expression
DDB_G0269794	0.053961	Bin_1_Lowest_expression
DDB_G0271354	0.0541726	Bin_1_Lowest_expression
DDB_G0272706	0.054458	Bin_1_Lowest_expression
DDB_G0267278	0.0546084	Bin_1_Lowest_expression
DDB_G0288353	0.0549516	Bin_1_Lowest_expression
DDB_G0272714	0.0550648	Bin_1_Lowest_expression
DDB_G0277275	0.055083	Bin_1_Lowest_expression
DDB_G0270122	0.0558519	Bin_1_Lowest_expression
DDB_G0293816	0.0558951	Bin_1_Lowest_expression
DDB_G0292816	0.0559272	Bin_1_Lowest_expression
DDB_G0292210	0.0559479	Bin_1_Lowest_expression
DDB_G0275309	0.0559725	Bin_1_Lowest_expression
DDB_G0271568	0.0560108	Bin_1_Lowest_expression
DDB_G0282487	0.0561067	Bin_1_Lowest_expression
DDB_G0281583	0.0564606	Bin_1_Lowest_expression
DDB_G0267684	0.0565118	Bin_1_Lowest_expression
DDB_G0292426	0.056799	Bin_1_Lowest_expression
DDB_G0271132	0.057159	Bin_1_Lowest_expression
DDB_G0279741	0.0573684	Bin_1_Lowest_expression
DDB_G0281035	0.0574658	Bin_1_Lowest_expression
DDB_G0295763	0.0577175	Bin_1_Lowest_expression
DDB_G0268152	0.05773	Bin_1_Lowest_expression
DDB_G0293720	0.0578375	Bin_1_Lowest_expression
DDB_G0290239	0.0579776	Bin_1_Lowest_expression
DDB_G0279889	0.0583691	Bin_1_Lowest_expression
DDB_G0274735	0.0584911	Bin_1_Lowest_expression
DDB_G0293604	0.0586015	Bin_1_Lowest_expression
DDB_G0267328	0.0586078	Bin_1_Lowest_expression
DDB_G0272500	0.0586327	Bin_1_Lowest_expression
DDB_G0289725	0.0588083	Bin_1_Lowest_expression
DDB_G0267324	0.0588341	Bin_1_Lowest_expression
DDB_G0290797	0.058951	Bin_1_Lowest_expression
DDB_G0289685	0.0596587	Bin_1_Lowest_expression
DDB_G0288975	0.0596972	Bin_1_Lowest_expression
DDB_G0289929	0.0598615	Bin_1_Lowest_expression
DDB_G0294296	0.0598615	Bin_1_Lowest_expression
DDB_G0275609	0.060061	Bin_1_Lowest_expression
DDB_G0277583	0.060061	Bin_1_Lowest_expression
DDB_G0282083	0.0604409	Bin_1_Lowest_expression
DDB_G0287771	0.0605878	Bin_1_Lowest_expression
DDB_G0279219	0.0606851	Bin_1_Lowest_expression
DDB_G0284615	0.0610249	Bin_1_Lowest_expression
DDB_G0293638	0.0613286	Bin_1_Lowest_expression
DDB_G0282589	0.0613957	Bin_1_Lowest_expression
DDB_G0282333	0.0616698	Bin_1_Lowest_expression
DDB_G0281577	0.0620906	Bin_1_Lowest_expression
DDB_G0282353	0.062151	Bin_1_Lowest_expression
DDB_G0277091	0.0624918	Bin_1_Lowest_expression
DDB_G0268254	0.062514	Bin_1_Lowest_expression
DDB_G0287085	0.0625578	Bin_1_Lowest_expression
DDB_G0267936	0.0626013	Bin_1_Lowest_expression
DDB_G0270820	0.0627547	Bin_1_Lowest_expression
DDB_G0276149	0.0628043	Bin_1_Lowest_expression
DDB_G0282877	0.0629562	Bin_1_Lowest_expression
DDB_G0291692	0.0629562	Bin_1_Lowest_expression
DDB_G0282567	0.0631704	Bin_1_Lowest_expression
DDB_G0290317	0.0635125	Bin_1_Lowest_expression
DDB_G0280501	0.0636591	Bin_1_Lowest_expression
DDB_G0277423	0.0637001	Bin_1_Lowest_expression
DDB_G0278917	0.0637638	Bin_1_Lowest_expression
DDB_G0279523	0.0639051	Bin_1_Lowest_expression
DDB_G0292938	0.0639538	Bin_1_Lowest_expression
DDB_G0279949	0.0640527	Bin_1_Lowest_expression
DDB_G0283083	0.06417	Bin_1_Lowest_expression
DDB_G0268324	0.064401	Bin_1_Lowest_expression
DDB_G0283241	0.0645515	Bin_1_Lowest_expression
DDB_G0288867	0.0645679	Bin_1_Lowest_expression
DDB_G0271158	0.0648039	Bin_1_Lowest_expression
DDB_G0283775	0.0651939	Bin_1_Lowest_expression
DDB_G0286213	0.0652418	Bin_1_Lowest_expression
DDB_G0291213	0.0654588	Bin_1_Lowest_expression
DDB_G0289635	0.0655184	Bin_1_Lowest_expression
DDB_G0272060	0.0655904	Bin_1_Lowest_expression
DDB_G0289315	0.0656753	Bin_1_Lowest_expression
DDB_G0293186	0.0656759	Bin_1_Lowest_expression
DDB_G0285423	0.0662672	Bin_1_Lowest_expression
DDB_G0290925	0.066456	Bin_1_Lowest_expression
DDB_G0279783	0.0667846	Bin_1_Lowest_expression
DDB_G0271930	0.0672761	Bin_1_Lowest_expression
DDB_G0288567	0.0676053	Bin_1_Lowest_expression
DDB_G0280675	0.0676995	Bin_1_Lowest_expression
DDB_G0275515	0.0678759	Bin_1_Lowest_expression
DDB_G0286155	0.0679068	Bin_1_Lowest_expression
DDB_G0269978	0.0681165	Bin_1_Lowest_expression
DDB_G0287529	0.0685819	Bin_1_Lowest_expression
DDB_G0286607	0.0688566	Bin_1_Lowest_expression
DDB_G0279243	0.0688789	Bin_1_Lowest_expression
DDB_G0289261	0.069106	Bin_1_Lowest_expression
DDB_G0287133	0.0691245	Bin_1_Lowest_expression
DDB_G0282791	0.0693011	Bin_1_Lowest_expression
DDB_G0282737	0.0693623	Bin_1_Lowest_expression
DDB_G0270502	0.0694172	Bin_1_Lowest_expression
DDB_G0285355	0.070122	Bin_1_Lowest_expression
DDB_G0268754	0.070617	Bin_1_Lowest_expression
DDB_G0270186	0.0708412	Bin_1_Lowest_expression
DDB_G0283599	0.0717784	Bin_1_Lowest_expression
DDB_G0272216	0.072038	Bin_1_Lowest_expression
DDB_G0285565	0.0721987	Bin_1_Lowest_expression
DDB_G0290635	0.0722063	Bin_1_Lowest_expression
DDB_G0292084	0.072501	Bin_1_Lowest_expression
DDB_G0267298	0.0728332	Bin_1_Lowest_expression
DDB_G0282437	0.072856	Bin_1_Lowest_expression
DDB_G0269116	0.0732157	Bin_1_Lowest_expression
DDB_G0280337	0.0732318	Bin_1_Lowest_expression
DDB_G0275411	0.0740037	Bin_1_Lowest_expression
DDB_G0292970	0.0741309	Bin_1_Lowest_expression
DDB_G0276009	0.0745484	Bin_1_Lowest_expression
DDB_G0269882	0.0754865	Bin_1_Lowest_expression
DDB_G0283689	0.0763206	Bin_1_Lowest_expression
DDB_G0280075	0.0765393	Bin_1_Lowest_expression
DDB_G0271074	0.0767446	Bin_1_Lowest_expression
DDB_G0289427	0.0767446	Bin_1_Lowest_expression
DDB_G0285791	0.0769193	Bin_1_Lowest_expression
DDB_G0286781	0.0770299	Bin_1_Lowest_expression
DDB_G0287963	0.0770299	Bin_1_Lowest_expression
DDB_G0290883	0.0771908	Bin_1_Lowest_expression
DDB_G0293818	0.0772384	Bin_1_Lowest_expression
DDB_G0289825	0.0773173	Bin_1_Lowest_expression
DDB_G0281939	0.0774018	Bin_1_Lowest_expression
DDB_G0270000	0.077929	Bin_1_Lowest_expression
DDB_G0289227	0.0779712	Bin_1_Lowest_expression
DDB_G0276705	0.0780326	Bin_1_Lowest_expression
DDB_G0281187	0.0782823	Bin_1_Lowest_expression
DDB_G0288419	0.078411	Bin_1_Lowest_expression
DDB_G0283575	0.0784707	Bin_1_Lowest_expression
DDB_G0268470	0.0788627	Bin_1_Lowest_expression
DDB_G0270530	0.0788627	Bin_1_Lowest_expression
DDB_G0283979	0.0789938	Bin_1_Lowest_expression
DDB_G0283197	0.0790295	Bin_1_Lowest_expression
DDB_G0285203	0.079135	Bin_1_Lowest_expression
DDB_G0291680	0.0792391	Bin_1_Lowest_expression
DDB_G0292824	0.079258	Bin_1_Lowest_expression
DDB_G0268640	0.0792926	Bin_1_Lowest_expression
DDB_G0290245	0.079317	Bin_1_Lowest_expression
DDB_G0286469	0.0793907	Bin_1_Lowest_expression
DDB_G0284787	0.0793909	Bin_1_Lowest_expression
DDB_G0288035	0.0793909	Bin_1_Lowest_expression
DDB_G0283487	0.0793934	Bin_1_Lowest_expression
DDB_G0269558	0.0797285	Bin_1_Lowest_expression
DDB_G0268326	0.080606	Bin_1_Lowest_expression
DDB_G0286737	0.0810011	Bin_1_Lowest_expression
DDB_G0283595	0.0814166	Bin_1_Lowest_expression
DDB_G0270474	0.0814186	Bin_1_Lowest_expression
DDB_G0289901	0.0814624	Bin_1_Lowest_expression
DDB_G0276165	0.0815789	Bin_1_Lowest_expression
DDB_G0276387	0.0819171	Bin_1_Lowest_expression
DDB_G0275615	0.0819754	Bin_1_Lowest_expression
DDB_G0293182	0.0822007	Bin_1_Lowest_expression
DDB_G0283399	0.0822263	Bin_1_Lowest_expression
DDB_G0272262	0.0824718	Bin_1_Lowest_expression
DDB_G0268644	0.0829292	Bin_1_Lowest_expression
DDB_G0273809	0.0829875	Bin_1_Lowest_expression
DDB_G0279483	0.0831831	Bin_1_Lowest_expression
DDB_G0292110	0.0836768	Bin_1_Lowest_expression
DDB_G0282947	0.0838347	Bin_1_Lowest_expression
DDB_G0292182	0.0838378	Bin_1_Lowest_expression
DDB_G0285861	0.0842761	Bin_1_Lowest_expression
DDB_G0277711	0.084595	Bin_1_Lowest_expression
DDB_G0286485	0.0846075	Bin_1_Lowest_expression
DDB_G0268482	0.0846767	Bin_1_Lowest_expression
DDB_G0294326	0.0850134	Bin_1_Lowest_expression
DDB_G0287455	0.0853475	Bin_1_Lowest_expression
DDB_G0276351	0.0855768	Bin_1_Lowest_expression
DDB_G0267182	0.0857015	Bin_1_Lowest_expression
DDB_G0292856	0.08574	Bin_1_Lowest_expression
DDB_G0271528	0.0858014	Bin_1_Lowest_expression
DDB_G0293906	0.0858014	Bin_1_Lowest_expression
DDB_G0278671	0.0858629	Bin_1_Lowest_expression
DDB_G0287659	0.0859256	Bin_1_Lowest_expression
DDB_G0283031	0.0863298	Bin_1_Lowest_expression
DDB_G0293432	0.0863377	Bin_1_Lowest_expression
DDB_G0270598	0.0863552	Bin_1_Lowest_expression
DDB_G0286093	0.0868807	Bin_1_Lowest_expression
DDB_G0285645	0.0870237	Bin_1_Lowest_expression
DDB_G0295751	0.0872129	Bin_1_Lowest_expression
DDB_G0289729	0.087801	Bin_1_Lowest_expression
DDB_G0286917	0.0879936	Bin_1_Lowest_expression
DDB_G0289977	0.0881434	Bin_1_Lowest_expression
DDB_G0295705	0.0883137	Bin_1_Lowest_expression
DDB_G0275605	0.0883626	Bin_1_Lowest_expression
DDB_G0292672	0.0885514	Bin_1_Lowest_expression
DDB_G0277605	0.0891227	Bin_1_Lowest_expression
DDB_G0290527	0.0895892	Bin_1_Lowest_expression
DDB_G0282439	0.0902877	Bin_1_Lowest_expression
DDB_G0273835	0.0913786	Bin_1_Lowest_expression
DDB_G0288513	0.091637	Bin_1_Lowest_expression
DDB_G0287571	0.0916676	Bin_1_Lowest_expression
DDB_G0277713	0.091686	Bin_1_Lowest_expression
DDB_G0284821	0.0920801	Bin_1_Lowest_expression
DDB_G0291392	0.0921836	Bin_1_Lowest_expression
DDB_G0269598	0.0921842	Bin_1_Lowest_expression
DDB_G0292976	0.0923575	Bin_1_Lowest_expression
DDB_G0286659	0.092375	Bin_1_Lowest_expression
DDB_G0273521	0.0925046	Bin_1_Lowest_expression
DDB_G0275803	0.0929093	Bin_1_Lowest_expression
DDB_G0273905	0.093338	Bin_1_Lowest_expression
DDB_G0286715	0.093338	Bin_1_Lowest_expression
DDB_G0286717	0.093338	Bin_1_Lowest_expression
DDB_G0289069	0.0933753	Bin_1_Lowest_expression
DDB_G0284659	0.0935285	Bin_1_Lowest_expression
DDB_G0290665	0.0935487	Bin_1_Lowest_expression
DDB_G0290533	0.0936544	Bin_1_Lowest_expression
DDB_G0267300	0.09382	Bin_1_Lowest_expression
DDB_G0276793	0.094049	Bin_1_Lowest_expression
DDB_G0269476	0.0943322	Bin_1_Lowest_expression
DDB_G0277903	0.0945883	Bin_1_Lowest_expression
DDB_G0270724	0.0945911	Bin_1_Lowest_expression
DDB_G0290755	0.094736	Bin_1_Lowest_expression
DDB_G0285667	0.0952321	Bin_1_Lowest_expression
DDB_G0278421	0.0952691	Bin_1_Lowest_expression
DDB_G0291552	0.0953453	Bin_1_Lowest_expression
DDB_G0280025	0.0960072	Bin_1_Lowest_expression
DDB_G0284531	0.0969032	Bin_1_Lowest_expression
DDB_G0267742	0.0970184	Bin_1_Lowest_expression
DDB_G0282411	0.0972521	Bin_1_Lowest_expression
DDB_G0272036	0.0972819	Bin_1_Lowest_expression
DDB_G0286609	0.0975593	Bin_1_Lowest_expression
DDB_G0284797	0.0979056	Bin_1_Lowest_expression
DDB_G0275393	0.0979652	Bin_1_Lowest_expression
DDB_G0278731	0.0980534	Bin_1_Lowest_expression
DDB_G0287231	0.0980953	Bin_1_Lowest_expression
DDB_G0278045	0.0985615	Bin_1_Lowest_expression
DDB_G0292822	0.0988413	Bin_1_Lowest_expression
DDB_G0281389	0.0990698	Bin_1_Lowest_expression
DDB_G0283613	0.0994109	Bin_1_Lowest_expression
DDB_G0268946	0.099512	Bin_1_Lowest_expression
DDB_G0277237	0.0999222	Bin_1_Lowest_expression
DDB_G0269586	0.100102	Bin_1_Lowest_expression
DDB_G0286177	0.100487	Bin_1_Lowest_expression
DDB_G0274801	0.100912	Bin_1_Lowest_expression
DDB_G0283785	0.100981	Bin_1_Lowest_expression
DDB_G0291946	0.101008	Bin_1_Lowest_expression
DDB_G0269902	0.101142	Bin_1_Lowest_expression
DDB_G0281161	0.101178	Bin_1_Lowest_expression
DDB_G0268656	0.101376	Bin_1_Lowest_expression
DDB_G0284143	0.101389	Bin_1_Lowest_expression
DDB_G0269436	0.101745	Bin_1_Lowest_expression
DDB_G0272963	0.101935	Bin_1_Lowest_expression
DDB_G0289887	0.101935	Bin_1_Lowest_expression
DDB_G0275099	0.101959	Bin_1_Lowest_expression
DDB_G0277169	0.102129	Bin_1_Lowest_expression
DDB_G0291257	0.102202	Bin_1_Lowest_expression
DDB_G0291784	0.102255	Bin_1_Lowest_expression
DDB_G0268542	0.102326	Bin_1_Lowest_expression
DDB_G0282605	0.10277	Bin_1_Lowest_expression
DDB_G0289919	0.103044	Bin_1_Lowest_expression
DDB_G0274309	0.103093	Bin_1_Lowest_expression
DDB_G0281735	0.103225	Bin_1_Lowest_expression
DDB_G0285623	0.103476	Bin_1_Lowest_expression
DDB_G0293782	0.104053	Bin_1_Lowest_expression
DDB_G0282899	0.104099	Bin_1_Lowest_expression
DDB_G0271156	0.104453	Bin_1_Lowest_expression
DDB_G0268692	0.1046	Bin_1_Lowest_expression
DDB_G0293660	0.104652	Bin_1_Lowest_expression
DDB_G0286573	0.104677	Bin_1_Lowest_expression
DDB_G0285983	0.104784	Bin_1_Lowest_expression
DDB_G0293864	0.104814	Bin_1_Lowest_expression
DDB_G0281011	0.105183	Bin_1_Lowest_expression
DDB_G0292696	0.10563	Bin_1_Lowest_expression
DDB_G0284529	0.105792	Bin_1_Lowest_expression
DDB_G0286597	0.106091	Bin_1_Lowest_expression
DDB_G0283077	0.106119	Bin_1_Lowest_expression
DDB_G0269648	0.106444	Bin_1_Lowest_expression
DDB_G0285885	0.106519	Bin_1_Lowest_expression
DDB_G0279845	0.106649	Bin_1_Lowest_expression
DDB_G0287527	0.10699	Bin_1_Lowest_expression
DDB_G0281905	0.107597	Bin_1_Lowest_expression
DDB_G0293892	0.107624	Bin_1_Lowest_expression
DDB_G0288767	0.107882	Bin_1_Lowest_expression
DDB_G0278177	0.107966	Bin_1_Lowest_expression
DDB_G0271758	0.108175	Bin_1_Lowest_expression
DDB_G0274393	0.108344	Bin_1_Lowest_expression
DDB_G0290467	0.108435	Bin_1_Lowest_expression
DDB_G0268108	0.10844	Bin_1_Lowest_expression
DDB_G0279615	0.109078	Bin_1_Lowest_expression
DDB_G0269730	0.109217	Bin_1_Lowest_expression
DDB_G0267888	0.109616	Bin_1_Lowest_expression
DDB_G0274755	0.109768	Bin_1_Lowest_expression
DDB_G0282703	0.110437	Bin_1_Lowest_expression
DDB_G0280395	0.110887	Bin_1_Lowest_expression
DDB_G0292932	0.111087	Bin_1_Lowest_expression
DDB_G0290827	0.111644	Bin_1_Lowest_expression
DDB_G0277921	0.111689	Bin_1_Lowest_expression
DDB_G0271700	0.111941	Bin_1_Lowest_expression
DDB_G0281295	0.11323	Bin_1_Lowest_expression
DDB_G0268942	0.113375	Bin_1_Lowest_expression
DDB_G0275897	0.113441	Bin_1_Lowest_expression
DDB_G0267740	0.113807	Bin_1_Lowest_expression
DDB_G0271908	0.114165	Bin_1_Lowest_expression
DDB_G0291476	0.114165	Bin_1_Lowest_expression
DDB_G0289387	0.114516	Bin_1_Lowest_expression
DDB_G0269026	0.114731	Bin_1_Lowest_expression
DDB_G0267532	0.114785	Bin_1_Lowest_expression
DDB_G0289617	0.114932	Bin_1_Lowest_expression
DDB_G0273755	0.115111	Bin_1_Lowest_expression
DDB_G0272811	0.115128	Bin_1_Lowest_expression
DDB_G0275535	0.115203	Bin_1_Lowest_expression
DDB_G0271172	0.11576	Bin_1_Lowest_expression
DDB_G0278391	0.115863	Bin_1_Lowest_expression
DDB_G0268150	0.116084	Bin_1_Lowest_expression
DDB_G0290855	0.116084	Bin_1_Lowest_expression
DDB_G0287117	0.116471	Bin_1_Lowest_expression
DDB_G0284179	0.116574	Bin_1_Lowest_expression
DDB_G0293940	0.116627	Bin_1_Lowest_expression
DDB_G0283555	0.11692	Bin_1_Lowest_expression
DDB_G0288669	0.116972	Bin_1_Lowest_expression
DDB_G0276429	0.117113	Bin_1_Lowest_expression
DDB_G0280935	0.117236	Bin_1_Lowest_expression
DDB_G0275047	0.117566	Bin_1_Lowest_expression
DDB_G0277481	0.117575	Bin_1_Lowest_expression
DDB_G0284191	0.117633	Bin_1_Lowest_expression
DDB_G0289129	0.117738	Bin_1_Lowest_expression
DDB_G0289781	0.117839	Bin_1_Lowest_expression
DDB_G0286309	0.118254	Bin_1_Lowest_expression
DDB_G0284325	0.118586	Bin_1_Lowest_expression
DDB_G0294232	0.118703	Bin_1_Lowest_expression
DDB_G0269618	0.119086	Bin_1_Lowest_expression
DDB_G0274271	0.119086	Bin_1_Lowest_expression
DDB_G0281339	0.119092	Bin_1_Lowest_expression
DDB_G0278951	0.11943	Bin_1_Lowest_expression
DDB_G0281897	0.119878	Bin_1_Lowest_expression
DDB_G0268960	0.120092	Bin_1_Lowest_expression
DDB_G0273877	0.120275	Bin_1_Lowest_expression
DDB_G0288139	0.120318	Bin_1_Lowest_expression
DDB_G0280839	0.120474	Bin_1_Lowest_expression
DDB_G0273545	0.121122	Bin_1_Lowest_expression
DDB_G0287177	0.122248	Bin_1_Lowest_expression
DDB_G0274413	0.1223	Bin_1_Lowest_expression
DDB_G0268294	0.122344	Bin_1_Lowest_expression
DDB_G0290691	0.122405	Bin_1_Lowest_expression
DDB_G0288369	0.122414	Bin_1_Lowest_expression
DDB_G0288535	0.123428	Bin_1_Lowest_expression
DDB_G0294230	0.123552	Bin_1_Lowest_expression
DDB_G0287479	0.123709	Bin_1_Lowest_expression
DDB_G0270660	0.124074	Bin_1_Lowest_expression
DDB_G0289459	0.124821	Bin_1_Lowest_expression
DDB_G0294196	0.125383	Bin_1_Lowest_expression
DDB_G0289049	0.125508	Bin_1_Lowest_expression
DDB_G0275225	0.125646	Bin_1_Lowest_expression
DDB_G0271028	0.125678	Bin_1_Lowest_expression
DDB_G0285037	0.126121	Bin_1_Lowest_expression
DDB_G0290961	0.126136	Bin_1_Lowest_expression
DDB_G0294374	0.126561	Bin_1_Lowest_expression
DDB_G0278859	0.126667	Bin_1_Lowest_expression
DDB_G0286905	0.12672	Bin_1_Lowest_expression
DDB_G0281193	0.1274	Bin_1_Lowest_expression
DDB_G0274087	0.127871	Bin_1_Lowest_expression
DDB_G0269836	0.128177	Bin_1_Lowest_expression
DDB_G0281645	0.12826	Bin_1_Lowest_expression
DDB_G0274033	0.12831	Bin_1_Lowest_expression
DDB_G0290475	0.128365	Bin_1_Lowest_expression
DDB_G0292422	0.128777	Bin_1_Lowest_expression
DDB_G0278515	0.129103	Bin_1_Lowest_expression
DDB_G0280049	0.129204	Bin_1_Lowest_expression
DDB_G0284287	0.129263	Bin_1_Lowest_expression
DDB_G0290845	0.129831	Bin_1_Lowest_expression
DDB_G0291844	0.13	Bin_1_Lowest_expression
DDB_G0290461	0.130321	Bin_1_Lowest_expression
DDB_G0293430	0.130321	Bin_1_Lowest_expression
DDB_G0280865	0.130401	Bin_1_Lowest_expression
DDB_G0274089	0.130526	Bin_1_Lowest_expression
DDB_G0270092	0.13067	Bin_1_Lowest_expression
DDB_G0279341	0.130743	Bin_1_Lowest_expression
DDB_G0271624	0.130975	Bin_1_Lowest_expression
DDB_G0269108	0.130981	Bin_1_Lowest_expression
DDB_G0275977	0.131146	Bin_1_Lowest_expression
DDB_G0267212	0.131356	Bin_1_Lowest_expression
DDB_G0275571	0.131374	Bin_1_Lowest_expression
DDB_G0287877	0.131677	Bin_1_Lowest_expression
DDB_G0269528	0.131716	Bin_1_Lowest_expression
DDB_G0279239	0.132385	Bin_1_Lowest_expression
DDB_G0288861	0.132541	Bin_1_Lowest_expression
DDB_G0280425	0.132988	Bin_1_Lowest_expression
DDB_G0289395	0.133001	Bin_1_Lowest_expression
DDB_G0285965	0.13328	Bin_1_Lowest_expression
DDB_G0290701	0.133297	Bin_1_Lowest_expression
DDB_G0293296	0.13354	Bin_1_Lowest_expression
DDB_G0276407	0.133739	Bin_1_Lowest_expression
DDB_G0271926	0.133999	Bin_1_Lowest_expression
DDB_G0279257	0.134096	Bin_1_Lowest_expression
DDB_G0286601	0.134198	Bin_1_Lowest_expression
DDB_G0274357	0.134341	Bin_1_Lowest_expression
DDB_G0278423	0.134478	Bin_1_Lowest_expression
DDB_G0283467	0.134844	Bin_1_Lowest_expression
DDB_G0279217	0.134989	Bin_1_Lowest_expression
DDB_G0294248	0.135281	Bin_1_Lowest_expression
DDB_G0283577	0.135671	Bin_1_Lowest_expression
DDB_G0282207	0.135981	Bin_1_Lowest_expression
DDB_G0276123	0.136041	Bin_1_Lowest_expression
DDB_G0285173	0.13672	Bin_1_Lowest_expression
DDB_G0278401	0.137183	Bin_1_Lowest_expression
DDB_G0281617	0.137225	Bin_1_Lowest_expression
DDB_G0282513	0.137225	Bin_1_Lowest_expression
DDB_G0289681	0.13728	Bin_1_Lowest_expression
DDB_G0280223	0.137529	Bin_1_Lowest_expression
DDB_G0292254	0.137552	Bin_1_Lowest_expression
DDB_G0287047	0.137918	Bin_1_Lowest_expression
DDB_G0279705	0.13814	Bin_1_Lowest_expression
DDB_G0270376	0.138388	Bin_1_Lowest_expression
DDB_G0270216	0.138454	Bin_1_Lowest_expression
DDB_G0274941	0.138495	Bin_1_Lowest_expression
DDB_G0269266	0.138718	Bin_1_Lowest_expression
DDB_G0293242	0.139346	Bin_1_Lowest_expression
DDB_G0267724	0.139415	Bin_1_Lowest_expression
DDB_G0291902	0.139889	Bin_1_Lowest_expression
DDB_G0287955	0.140613	Bin_1_Lowest_expression
DDB_G0274517	0.14084	Bin_1_Lowest_expression
DDB_G0278011	0.140969	Bin_1_Lowest_expression
DDB_G0271260	0.141202	Bin_1_Lowest_expression
DDB_G0270342	0.142217	Bin_1_Lowest_expression
DDB_G0285259	0.142418	Bin_1_Lowest_expression
DDB_G0283811	0.142557	Bin_1_Lowest_expression
DDB_G0276659	0.142926	Bin_1_Lowest_expression
DDB_G0293806	0.143014	Bin_1_Lowest_expression
DDB_G0286731	0.143248	Bin_1_Lowest_expression
DDB_G0272330	0.143919	Bin_1_Lowest_expression
DDB_G0282761	0.144203	Bin_1_Lowest_expression
DDB_G0279017	0.144208	Bin_1_Lowest_expression
DDB_G0267792	0.144281	Bin_1_Lowest_expression
DDB_G0294320	0.145257	Bin_1_Lowest_expression
DDB_G0284453	0.145875	Bin_1_Lowest_expression
DDB_G0288303	0.146454	Bin_1_Lowest_expression
DDB_G0284261	0.146745	Bin_1_Lowest_expression
DDB_G0287789	0.146958	Bin_1_Lowest_expression
DDB_G0282275	0.147177	Bin_1_Lowest_expression
DDB_G0276991	0.147387	Bin_1_Lowest_expression
DDB_G0278017	0.147744	Bin_1_Lowest_expression
DDB_G0284789	0.147862	Bin_1_Lowest_expression
DDB_G0276967	0.148375	Bin_1_Lowest_expression
DDB_G0283941	0.148593	Bin_1_Lowest_expression
DDB_G0271128	0.148746	Bin_1_Lowest_expression
DDB_G0290505	0.148961	Bin_1_Lowest_expression
DDB_G0269654	0.14908	Bin_1_Lowest_expression
DDB_G0288967	0.149929	Bin_1_Lowest_expression
DDB_G0282037	0.150152	Bin_1_Lowest_expression
DDB_G0293840	0.150152	Bin_1_Lowest_expression
DDB_G0282827	0.1503	Bin_1_Lowest_expression
DDB_G0291209	0.150832	Bin_1_Lowest_expression
DDB_G0274335	0.151011	Bin_1_Lowest_expression
DDB_G0290255	0.151675	Bin_1_Lowest_expression
DDB_G0283501	0.151802	Bin_1_Lowest_expression
DDB_G0292520	0.152728	Bin_1_Lowest_expression
DDB_G0282039	0.152923	Bin_1_Lowest_expression
DDB_G0283421	0.15406	Bin_1_Lowest_expression
DDB_G0277853	0.154193	Bin_1_Lowest_expression
DDB_G0281853	0.154481	Bin_1_Lowest_expression
DDB_G0280199	0.154616	Bin_1_Lowest_expression
DDB_G0282989	0.155022	Bin_1_Lowest_expression
DDB_G0288323	0.155541	Bin_1_Lowest_expression
DDB_G0288489	0.156525	Bin_1_Lowest_expression
DDB_G0288457	0.156577	Bin_1_Lowest_expression
DDB_G0286369	0.15686	Bin_1_Lowest_expression
DDB_G0276303	0.157193	Bin_1_Lowest_expression
DDB_G0272278	0.157542	Bin_1_Lowest_expression
DDB_G0290841	0.157624	Bin_1_Lowest_expression
DDB_G0272386	0.157761	Bin_1_Lowest_expression
DDB_G0282415	0.158236	Bin_1_Lowest_expression
DDB_G0274227	0.158249	Bin_1_Lowest_expression
DDB_G0286081	0.15875	Bin_1_Lowest_expression
DDB_G0287313	0.158842	Bin_1_Lowest_expression
DDB_G0282521	0.158986	Bin_1_Lowest_expression
DDB_G0283517	0.159393	Bin_1_Lowest_expression
DDB_G0271328	0.159763	Bin_1_Lowest_expression
DDB_G0280405	0.160681	Bin_1_Lowest_expression
DDB_G0280717	0.161291	Bin_1_Lowest_expression
DDB_G0276201	0.161435	Bin_1_Lowest_expression
DDB_G0270970	0.161807	Bin_1_Lowest_expression
DDB_G0289879	0.162021	Bin_1_Lowest_expression
DDB_G0273685	0.162035	Bin_1_Lowest_expression
DDB_G0280387	0.162035	Bin_1_Lowest_expression
DDB_G0291602	0.162035	Bin_1_Lowest_expression
DDB_G0286165	0.162235	Bin_1_Lowest_expression
DDB_G0280665	0.162519	Bin_1_Lowest_expression
DDB_G0292658	0.162583	Bin_1_Lowest_expression
DDB_G0279385	0.16259	Bin_1_Lowest_expression
DDB_G0274031	0.162748	Bin_1_Lowest_expression
DDB_G0283807	0.163617	Bin_1_Lowest_expression
DDB_G0274751	0.164247	Bin_1_Lowest_expression
DDB_G0280333	0.164629	Bin_1_Lowest_expression
DDB_G0278213	0.165315	Bin_1_Lowest_expression
DDB_G0272214	0.166255	Bin_1_Lowest_expression
DDB_G0286585	0.16626	Bin_1_Lowest_expression
DDB_G0274919	0.166585	Bin_1_Lowest_expression
DDB_G0270198	0.167014	Bin_1_Lowest_expression
DDB_G0273653	0.167529	Bin_1_Lowest_expression
DDB_G0277415	0.167597	Bin_1_Lowest_expression
DDB_G0275117	0.167612	Bin_1_Lowest_expression
DDB_G0291045	0.167971	Bin_1_Lowest_expression
DDB_G0295731	0.168935	Bin_1_Lowest_expression
DDB_G0281019	0.168959	Bin_1_Lowest_expression
DDB_G0288111	0.16918	Bin_1_Lowest_expression
DDB_G0271712	0.169442	Bin_1_Lowest_expression
DDB_G0295623	0.169845	Bin_1_Lowest_expression
DDB_G0293060	0.170097	Bin_1_Lowest_expression
DDB_G0271372	0.170179	Bin_1_Lowest_expression
DDB_G0291083	0.170535	Bin_1_Lowest_expression
DDB_G0271826	0.170728	Bin_1_Lowest_expression
DDB_G0285751	0.170961	Bin_1_Lowest_expression
DDB_G0270328	0.171838	Bin_1_Lowest_expression
DDB_G0273883	0.172073	Bin_1_Lowest_expression
DDB_G0274391	0.17217	Bin_1_Lowest_expression
DDB_G0285643	0.172339	Bin_1_Lowest_expression
DDB_G0271596	0.172535	Bin_1_Lowest_expression
DDB_G0269886	0.172947	Bin_1_Lowest_expression
DDB_G0270788	0.173054	Bin_1_Lowest_expression
DDB_G0273601	0.173394	Bin_1_Lowest_expression
DDB_G0289251	0.174211	Bin_1_Lowest_expression
DDB_G0277703	0.174774	Bin_1_Lowest_expression
DDB_G0282883	0.175909	Bin_1_Lowest_expression
DDB_G0272340	0.176203	Bin_1_Lowest_expression
DDB_G0286981	0.176713	Bin_1_Lowest_expression
DDB_G0279995	0.177033	Bin_1_Lowest_expression
DDB_G0271080	0.177103	Bin_1_Lowest_expression
DDB_G0271570	0.177215	Bin_1_Lowest_expression
DDB_G0279119	0.178542	Bin_1_Lowest_expression
DDB_G0268950	0.179291	Bin_1_Lowest_expression
DDB_G0277105	0.179343	Bin_1_Lowest_expression
DDB_G0292314	0.180911	Bin_1_Lowest_expression
DDB_G0280959	0.181063	Bin_1_Lowest_expression
DDB_G0291165	0.181763	Bin_1_Lowest_expression
DDB_G0291422	0.183039	Bin_1_Lowest_expression
DDB_G0284905	0.184812	Bin_1_Lowest_expression
DDB_G0288151	0.185201	Bin_1_Lowest_expression
DDB_G0286891	0.186079	Bin_1_Lowest_expression
DDB_G0269360	0.186233	Bin_1_Lowest_expression
DDB_G0293612	0.186333	Bin_1_Lowest_expression
DDB_G0275479	0.1866	Bin_1_Lowest_expression
DDB_G0284707	0.186966	Bin_1_Lowest_expression
DDB_G0287549	0.187716	Bin_1_Lowest_expression
DDB_G0285237	0.188249	Bin_1_Lowest_expression
DDB_G0267620	0.188533	Bin_1_Lowest_expression
DDB_G0272919	0.188856	Bin_1_Lowest_expression
DDB_G0281753	0.189233	Bin_1_Lowest_expression
DDB_G0278927	0.189759	Bin_1_Lowest_expression
DDB_G0278199	0.190048	Bin_1_Lowest_expression
DDB_G0288357	0.190079	Bin_1_Lowest_expression
DDB_G0271324	0.190283	Bin_1_Lowest_expression
DDB_G0277271	0.190339	Bin_1_Lowest_expression
DDB_G0290079	0.190408	Bin_1_Lowest_expression
DDB_G0288889	0.190772	Bin_1_Lowest_expression
DDB_G0289925	0.191097	Bin_1_Lowest_expression
DDB_G0277651	0.191178	Bin_1_Lowest_expression
DDB_G0287387	0.191482	Bin_1_Lowest_expression
DDB_G0290739	0.193575	Bin_1_Lowest_expression
DDB_G0289789	0.19405	Bin_1_Lowest_expression
DDB_G0267898	0.194389	Bin_1_Lowest_expression
DDB_G0280943	0.194555	Bin_1_Lowest_expression
DDB_G0272506	0.194564	Bin_1_Lowest_expression
DDB_G0289195	0.194605	Bin_1_Lowest_expression
DDB_G0267876	0.194743	Bin_1_Lowest_expression
DDB_G0280863	0.195738	Bin_1_Lowest_expression
DDB_G0295819	0.195978	Bin_1_Lowest_expression
DDB_G0284315	0.197453	Bin_1_Lowest_expression
DDB_G0286965	0.197683	Bin_1_Lowest_expression
DDB_G0286367	0.197808	Bin_1_Lowest_expression
DDB_G0291706	0.197937	Bin_1_Lowest_expression
DDB_G0290749	0.198209	Bin_1_Lowest_expression
DDB_G0275293	0.198509	Bin_1_Lowest_expression
DDB_G0284121	0.199139	Bin_1_Lowest_expression
DDB_G0279795	0.199879	Bin_1_Lowest_expression
DDB_G0267260	0.199894	Bin_1_Lowest_expression
DDB_G0267840	0.200047	Bin_1_Lowest_expression
DDB_G0289351	0.200124	Bin_1_Lowest_expression
DDB_G0284647	0.200806	Bin_1_Lowest_expression
DDB_G0272512	0.201439	Bin_1_Lowest_expression
DDB_G0286685	0.201717	Bin_1_Lowest_expression
DDB_G0292476	0.202236	Bin_1_Lowest_expression
DDB_G0284967	0.202457	Bin_1_Lowest_expression
DDB_G0292014	0.202478	Bin_1_Lowest_expression
DDB_G0281515	0.204074	Bin_1_Lowest_expression
DDB_G0275063	0.204108	Bin_1_Lowest_expression
DDB_G0270330	0.204158	Bin_1_Lowest_expression
DDB_G0281079	0.204704	Bin_1_Lowest_expression
DDB_G0269806	0.205215	Bin_1_Lowest_expression
DDB_G0283443	0.205529	Bin_1_Lowest_expression
DDB_G0290793	0.205564	Bin_1_Lowest_expression
DDB_G0289249	0.206285	Bin_1_Lowest_expression
DDB_G0293326	0.206681	Bin_1_Lowest_expression
DDB_G0287743	0.20721	Bin_1_Lowest_expression
DDB_G0285865	0.207371	Bin_1_Lowest_expression
DDB_G0284005	0.208087	Bin_1_Lowest_expression
DDB_G0294164	0.208875	Bin_1_Lowest_expression
DDB_G0290525	0.209031	Bin_1_Lowest_expression
DDB_G0280417	0.209309	Bin_1_Lowest_expression
DDB_G0283897	0.210015	Bin_1_Lowest_expression
DDB_G0277531	0.21007	Bin_1_Lowest_expression
DDB_G0278083	0.210237	Bin_1_Lowest_expression
DDB_G0267466	0.210274	Bin_1_Lowest_expression
DDB_G0281173	0.210568	Bin_1_Lowest_expression
DDB_G0268802	0.211232	Bin_1_Lowest_expression
DDB_G0277795	0.212415	Bin_1_Lowest_expression
DDB_G0286913	0.212437	Bin_1_Lowest_expression
DDB_G0289683	0.212535	Bin_1_Lowest_expression
DDB_G0284559	0.214004	Bin_1_Lowest_expression
DDB_G0290633	0.214411	Bin_1_Lowest_expression
DDB_G0287199	0.215007	Bin_1_Lowest_expression
DDB_G0287863	0.215121	Bin_1_Lowest_expression
DDB_G0285369	0.215844	Bin_1_Lowest_expression
DDB_G0282435	0.216135	Bin_1_Lowest_expression
DDB_G0277965	0.216195	Bin_1_Lowest_expression
DDB_G0293334	0.216267	Bin_1_Lowest_expression
DDB_G0288571	0.216809	Bin_1_Lowest_expression
DDB_G0286915	0.217503	Bin_1_Lowest_expression
DDB_G0269940	0.217672	Bin_1_Lowest_expression
DDB_G0274451	0.217783	Bin_1_Lowest_expression
DDB_G0274277	0.219728	Bin_1_Lowest_expression
DDB_G0290383	0.220139	Bin_1_Lowest_expression
DDB_G0272656	0.220298	Bin_1_Lowest_expression
DDB_G0288491	0.220521	Bin_1_Lowest_expression
DDB_G0273821	0.220564	Bin_1_Lowest_expression
DDB_G0289975	0.220596	Bin_1_Lowest_expression
DDB_G0277679	0.22065	Bin_1_Lowest_expression
DDB_G0284085	0.221253	Bin_1_Lowest_expression
DDB_G0277547	0.221553	Bin_1_Lowest_expression
DDB_G0282643	0.221616	Bin_1_Lowest_expression
DDB_G0275991	0.222252	Bin_1_Lowest_expression
DDB_G0276127	0.222394	Bin_1_Lowest_expression
DDB_G0268832	0.222399	Bin_1_Lowest_expression
DDB_G0275043	0.222807	Bin_1_Lowest_expression
DDB_G0267370	0.223176	Bin_1_Lowest_expression
DDB_G0289577	0.223276	Bin_1_Lowest_expression
DDB_G0294567	0.223463	Bin_1_Lowest_expression
DDB_G0287389	0.224239	Bin_1_Lowest_expression
DDB_G0272843	0.224432	Bin_1_Lowest_expression
DDB_G0275321	0.224723	Bin_1_Lowest_expression
DDB_G0286153	0.225018	Bin_1_Lowest_expression
DDB_G0275155	0.225707	Bin_1_Lowest_expression
DDB_G0290095	0.225853	Bin_1_Lowest_expression
DDB_G0282657	0.225923	Bin_1_Lowest_expression
DDB_G0268346	0.226541	Bin_1_Lowest_expression
DDB_G0280911	0.226652	Bin_1_Lowest_expression
DDB_G0295521	0.227221	Bin_1_Lowest_expression
DDB_G0290789	0.227251	Bin_1_Lowest_expression
DDB_G0290291	0.227526	Bin_1_Lowest_expression
DDB_G0268178	0.228305	Bin_1_Lowest_expression
DDB_G0288497	0.228879	Bin_1_Lowest_expression
DDB_G0281675	0.230016	Bin_1_Lowest_expression
DDB_G0282179	0.230016	Bin_1_Lowest_expression
DDB_G0280441	0.230063	Bin_1_Lowest_expression
DDB_G0288877	0.230153	Bin_1_Lowest_expression
DDB_G0272376	0.230766	Bin_1_Lowest_expression
DDB_G0270938	0.231492	Bin_1_Lowest_expression
DDB_G0271176	0.231959	Bin_1_Lowest_expression
DDB_G0278655	0.232403	Bin_1_Lowest_expression
DDB_G0270154	0.232948	Bin_1_Lowest_expression
DDB_G0289443	0.233588	Bin_1_Lowest_expression
DDB_G0286499	0.233998	Bin_1_Lowest_expression
DDB_G0286527	0.235206	Bin_1_Lowest_expression
DDB_G0269516	0.235336	Bin_1_Lowest_expression
DDB_G0281113	0.235385	Bin_1_Lowest_expression
DDB_G0270688	0.235935	Bin_1_Lowest_expression
DDB_G0278953	0.236745	Bin_1_Lowest_expression
DDB_G0285225	0.23945	Bin_1_Lowest_expression
DDB_G0275327	0.239778	Bin_1_Lowest_expression
DDB_G0269622	0.239804	Bin_1_Lowest_expression
DDB_G0295693	0.241543	Bin_1_Lowest_expression
DDB_G0294569	0.242402	Bin_1_Lowest_expression
DDB_G0292792	0.24306	Bin_1_Lowest_expression
DDB_G0268166	0.244353	Bin_1_Lowest_expression
DDB_G0270574	0.24441	Bin_1_Lowest_expression
DDB_G0285121	0.244599	Bin_1_Lowest_expression
DDB_G0287559	0.245577	Bin_1_Lowest_expression
DDB_G0270218	0.245912	Bin_1_Lowest_expression
DDB_G0270016	0.246532	Bin_1_Lowest_expression
DDB_G0276671	0.246781	Bin_1_Lowest_expression
DDB_G0277695	0.247	Bin_1_Lowest_expression
DDB_G0277555	0.247239	Bin_1_Lowest_expression
DDB_G0270426	0.247716	Bin_1_Lowest_expression
DDB_G0286439	0.247716	Bin_1_Lowest_expression
DDB_G0268840	0.24774	Bin_1_Lowest_expression
DDB_G0291430	0.24797	Bin_1_Lowest_expression
DDB_G0268740	0.248336	Bin_1_Lowest_expression
DDB_G0281199	0.248558	Bin_1_Lowest_expression
DDB_G0286751	0.249646	Bin_1_Lowest_expression
DDB_G0277497	0.250445	Bin_1_Lowest_expression
DDB_G0270222	0.250503	Bin_1_Lowest_expression
DDB_G0269392	0.250595	Bin_1_Lowest_expression
DDB_G0294220	0.250625	Bin_1_Lowest_expression
DDB_G0280227	0.251232	Bin_1_Lowest_expression
DDB_G0269872	0.251272	Bin_1_Lowest_expression
DDB_G0289871	0.251798	Bin_1_Lowest_expression
DDB_G0285167	0.252347	Bin_1_Lowest_expression
DDB_G0278697	0.252894	Bin_1_Lowest_expression
DDB_G0283503	0.253005	Bin_1_Lowest_expression
DDB_G0286865	0.253439	Bin_1_Lowest_expression
DDB_G0294575	0.253557	Bin_1_Lowest_expression
DDB_G0275521	0.253875	Bin_1_Lowest_expression
DDB_G0293632	0.254055	Bin_1_Lowest_expression
DDB_G0282029	0.254647	Bin_1_Lowest_expression
DDB_G0275251	0.254931	Bin_1_Lowest_expression
DDB_G0270368	0.255506	Bin_1_Lowest_expression
DDB_G0274117	0.255737	Bin_1_Lowest_expression
DDB_G0289817	0.256596	Bin_1_Lowest_expression
DDB_G0280461	0.256941	Bin_1_Lowest_expression
DDB_G0289089	0.256955	Bin_1_Lowest_expression
DDB_G0292966	0.257221	Bin_1_Lowest_expression
DDB_G0285707	0.257407	Bin_1_Lowest_expression
DDB_G0287675	0.257912	Bin_1_Lowest_expression
DDB_G0279953	0.25819	Bin_1_Lowest_expression
DDB_G0279517	0.258204	Bin_1_Lowest_expression
DDB_G0292436	0.258324	Bin_1_Lowest_expression
DDB_G0290549	0.258437	Bin_1_Lowest_expression
DDB_G0293918	0.258894	Bin_1_Lowest_expression
DDB_G0275597	0.260642	Bin_1_Lowest_expression
DDB_G0268918	0.261128	Bin_1_Lowest_expression
DDB_G0290677	0.262259	Bin_1_Lowest_expression
DDB_G0268450	0.263039	Bin_1_Lowest_expression
DDB_G0277739	0.263124	Bin_1_Lowest_expression
DDB_G0285431	0.26337	Bin_1_Lowest_expression
DDB_G0274507	0.263577	Bin_1_Lowest_expression
DDB_G0281057	0.26551	Bin_1_Lowest_expression
DDB_G0276173	0.265654	Bin_1_Lowest_expression
DDB_G0287861	0.268193	Bin_1_Lowest_expression
DDB_G0292612	0.26821	Bin_1_Lowest_expression
DDB_G0271168	0.268233	Bin_1_Lowest_expression
DDB_G0270926	0.26864	Bin_1_Lowest_expression
DDB_G0281203	0.268871	Bin_1_Lowest_expression
DDB_G0273633	0.269242	Bin_1_Lowest_expression
DDB_G0270284	0.269344	Bin_1_Lowest_expression
DDB_G0282829	0.269811	Bin_1_Lowest_expression
DDB_G0275023	0.269977	Bin_1_Lowest_expression
DDB_G0275549	0.270132	Bin_1_Lowest_expression
DDB_G0272546	0.270175	Bin_1_Lowest_expression
DDB_G0293068	0.270334	Bin_1_Lowest_expression
DDB_G0289837	0.270473	Bin_1_Lowest_expression
DDB_G0274467	0.270644	Bin_1_Lowest_expression
DDB_G0283867	0.271554	Bin_1_Lowest_expression
DDB_G0268234	0.271771	Bin_1_Lowest_expression
DDB_G0292996	0.271782	Bin_1_Lowest_expression
DDB_G0275465	0.272367	Bin_1_Lowest_expression
DDB_G0286577	0.27319	Bin_1_Lowest_expression
DDB_G0269268	0.275478	Bin_1_Lowest_expression
DDB_G0281299	0.276718	Bin_1_Lowest_expression
DDB_G0273943	0.276981	Bin_1_Lowest_expression
DDB_G0271526	0.27811	Bin_1_Lowest_expression
DDB_G0288817	0.278967	Bin_1_Lowest_expression
DDB_G0286721	0.280014	Bin_1_Lowest_expression
DDB_G0287433	0.280014	Bin_1_Lowest_expression
DDB_G0290323	0.28007	Bin_1_Lowest_expression
DDB_G0270606	0.280524	Bin_1_Lowest_expression
DDB_G0280155	0.281121	Bin_1_Lowest_expression
DDB_G0289121	0.281314	Bin_1_Lowest_expression
DDB_G0289039	0.281421	Bin_1_Lowest_expression
DDB_G0283839	0.281804	Bin_1_Lowest_expression
DDB_G0277969	0.281939	Bin_1_Lowest_expression
DDB_G0293028	0.28322	Bin_1_Lowest_expression
DDB_G0278203	0.283409	Bin_1_Lowest_expression
DDB_G0270350	0.283574	Bin_1_Lowest_expression
DDB_G0275419	0.283964	Bin_1_Lowest_expression
DDB_G0270586	0.285097	Bin_1_Lowest_expression
DDB_G0271152	0.285402	Bin_1_Lowest_expression
DDB_G0285701	0.285558	Bin_1_Lowest_expression
DDB_G0280915	0.285655	Bin_1_Lowest_expression
DDB_G0280509	0.286891	Bin_1_Lowest_expression
DDB_G0291197	0.286907	Bin_1_Lowest_expression
DDB_G0289983	0.287028	Bin_1_Lowest_expression
DDB_G0280623	0.287296	Bin_1_Lowest_expression
DDB_G0280149	0.2875	Bin_1_Lowest_expression
DDB_G0267238	0.288738	Bin_1_Lowest_expression
DDB_G0287059	0.290095	Bin_1_Lowest_expression
DDB_G0285087	0.290343	Bin_1_Lowest_expression
DDB_G0289903	0.290557	Bin_1_Lowest_expression
DDB_G0291388	0.29071	Bin_1_Lowest_expression
DDB_G0283201	0.290896	Bin_1_Lowest_expression
DDB_G0269018	0.291176	Bin_1_Lowest_expression
DDB_G0287795	0.291478	Bin_1_Lowest_expression
DDB_G0287417	0.291519	Bin_1_Lowest_expression
DDB_G0268322	0.292216	Bin_1_Lowest_expression
DDB_G0271722	0.292475	Bin_2
DDB_G0295803	0.29257	Bin_2
DDB_G0285531	0.293752	Bin_2
DDB_G0292900	0.294612	Bin_2
DDB_G0290153	0.29536	Bin_2
DDB_G0293842	0.29538	Bin_2
DDB_G0270406	0.296066	Bin_2
DDB_G0285001	0.296398	Bin_2
DDB_G0274681	0.296614	Bin_2
DDB_G0274963	0.296868	Bin_2
DDB_G0272654	0.297188	Bin_2
DDB_G0291712	0.297599	Bin_2
DDB_G0283611	0.29779	Bin_2
DDB_G0280019	0.29874	Bin_2
DDB_G0269042	0.299029	Bin_2
DDB_G0282587	0.299208	Bin_2
DDB_G0289367	0.299459	Bin_2
DDB_G0274853	0.299542	Bin_2
DDB_G0281087	0.299604	Bin_2
DDB_G0277385	0.299842	Bin_2
DDB_G0270318	0.29996	Bin_2
DDB_G0275531	0.300305	Bin_2
DDB_G0269176	0.300507	Bin_2
DDB_G0288207	0.302605	Bin_2
DDB_G0277059	0.30344	Bin_2
DDB_G0289741	0.304132	Bin_2
DDB_G0292674	0.306237	Bin_2
DDB_G0271228	0.306657	Bin_2
DDB_G0271226	0.306978	Bin_2
DDB_G0291322	0.307971	Bin_2
DDB_G0293656	0.308645	Bin_2
DDB_G0290569	0.308796	Bin_2
DDB_G0268050	0.309497	Bin_2
DDB_G0285409	0.309976	Bin_2
DDB_G0289219	0.310453	Bin_2
DDB_G0279361	0.310639	Bin_2
DDB_G0286321	0.31074	Bin_2
DDB_G0289545	0.312875	Bin_2
DDB_G0290879	0.313444	Bin_2
DDB_G0277035	0.31437	Bin_2
DDB_G0268160	0.314499	Bin_2
DDB_G0285625	0.316245	Bin_2
DDB_G0280615	0.317211	Bin_2
DDB_G0272975	0.317301	Bin_2
DDB_G0287211	0.318435	Bin_2
DDB_G0276745	0.318813	Bin_2
DDB_G0284351	0.319163	Bin_2
DDB_G0278537	0.319324	Bin_2
DDB_G0272508	0.319831	Bin_2
DDB_G0286723	0.320245	Bin_2
DDB_G0288945	0.320496	Bin_2
DDB_G0295829	0.320614	Bin_2
DDB_G0271406	0.32116	Bin_2
DDB_G0270084	0.321442	Bin_2
DDB_G0292180	0.322694	Bin_2
DDB_G0268318	0.323049	Bin_2
DDB_G0280957	0.32359	Bin_2
DDB_G0281423	0.32372	Bin_2
DDB_G0279799	0.324788	Bin_2
DDB_G0273641	0.324972	Bin_2
DDB_G0272981	0.325369	Bin_2
DDB_G0286095	0.32718	Bin_2
DDB_G0269674	0.327234	Bin_2
DDB_G0280861	0.327487	Bin_2
DDB_G0281449	0.328127	Bin_2
DDB_G0287845	0.328598	Bin_2
DDB_G0277647	0.328863	Bin_2
DDB_G0276367	0.328883	Bin_2
DDB_G0267564	0.329434	Bin_2
DDB_G0280531	0.330051	Bin_2
DDB_G0272146	0.330414	Bin_2
DDB_G0267306	0.331109	Bin_2
DDB_G0285637	0.331728	Bin_2
DDB_G0289447	0.332	Bin_2
DDB_G0286593	0.332439	Bin_2
DDB_G0270680	0.332928	Bin_2
DDB_G0279533	0.333108	Bin_2
DDB_G0285309	0.333194	Bin_2
DDB_G0276731	0.333595	Bin_2
DDB_G0269124	0.333595	Bin_2
DDB_G0278647	0.33433	Bin_2
DDB_G0272827	0.335773	Bin_2
DDB_G0270240	0.336004	Bin_2
DDB_G0293276	0.336345	Bin_2
DDB_G0291632	0.336881	Bin_2
DDB_G0275193	0.336927	Bin_2
DDB_G0274245	0.338285	Bin_2
DDB_G0279709	0.338991	Bin_2
DDB_G0295541	0.339689	Bin_2
DDB_G0291930	0.340342	Bin_2
DDB_G0270374	0.340361	Bin_2
DDB_G0276125	0.341908	Bin_2
DDB_G0270636	0.342301	Bin_2
DDB_G0268082	0.342676	Bin_2
DDB_G0288013	0.343095	Bin_2
DDB_G0281463	0.343373	Bin_2
DDB_G0269846	0.345351	Bin_2
DDB_G0290361	0.345897	Bin_2
DDB_G0288725	0.34597	Bin_2
DDB_G0267694	0.346081	Bin_2
DDB_G0279307	0.346506	Bin_2
DDB_G0281493	0.347284	Bin_2
DDB_G0271672	0.347544	Bin_2
DDB_G0288197	0.348733	Bin_2
DDB_G0272927	0.349076	Bin_2
DDB_G0269748	0.349141	Bin_2
DDB_G0290737	0.349564	Bin_2
DDB_G0274337	0.350207	Bin_2
DDB_G0267770	0.350607	Bin_2
DDB_G0288499	0.350792	Bin_2
DDB_G0280239	0.351644	Bin_2
DDB_G0270094	0.351912	Bin_2
DDB_G0270914	0.352109	Bin_2
DDB_G0277421	0.354061	Bin_2
DDB_G0276087	0.355034	Bin_2
DDB_G0275745	0.355121	Bin_2
DDB_G0278377	0.355229	Bin_2
DDB_G0290763	0.355433	Bin_2
DDB_G0288583	0.355744	Bin_2
DDB_G0288503	0.355846	Bin_2
DDB_G0277191	0.358991	Bin_2
DDB_G0279531	0.35946	Bin_2
DDB_G0295841	0.36011	Bin_2
DDB_G0291137	0.360651	Bin_2
DDB_G0269928	0.361681	Bin_2
DDB_G0293348	0.363133	Bin_2
DDB_G0281613	0.363178	Bin_2
DDB_G0267542	0.363527	Bin_2
DDB_G0276215	0.3644	Bin_2
DDB_G0288587	0.365264	Bin_2
DDB_G0283125	0.365494	Bin_2
DDB_G0291095	0.366302	Bin_2
DDB_G0277445	0.368555	Bin_2
DDB_G0288297	0.369656	Bin_2
DDB_G0274991	0.369659	Bin_2
DDB_G0277463	0.37031	Bin_2
DDB_G0295621	0.370655	Bin_2
DDB_G0267672	0.371159	Bin_2
DDB_G0292598	0.371908	Bin_2
DDB_G0276421	0.372213	Bin_2
DDB_G0288343	0.372265	Bin_2
DDB_G0274501	0.372978	Bin_2
DDB_G0275243	0.373245	Bin_2
DDB_G0288455	0.373406	Bin_2
DDB_G0290613	0.374539	Bin_2
DDB_G0278009	0.375295	Bin_2
DDB_G0276223	0.375674	Bin_2
DDB_G0287809	0.375708	Bin_2
DDB_G0272773	0.376533	Bin_2
DDB_G0290191	0.377737	Bin_2
DDB_G0280791	0.378883	Bin_2
DDB_G0278201	0.379169	Bin_2
DDB_G0290469	0.379631	Bin_2
DDB_G0285745	0.380337	Bin_2
DDB_G0274453	0.380827	Bin_2
DDB_G0293980	0.38097	Bin_2
DDB_G0271056	0.381724	Bin_2
DDB_G0288813	0.381794	Bin_2
DDB_G0284767	0.382166	Bin_2
DDB_G0281533	0.382862	Bin_2
DDB_G0285289	0.383089	Bin_2
DDB_G0282811	0.384214	Bin_2
DDB_G0284441	0.384692	Bin_2
DDB_G0280391	0.385336	Bin_2
DDB_G0282893	0.385658	Bin_2
DDB_G0282753	0.385778	Bin_2
DDB_G0293676	0.386952	Bin_2
DDB_G0288973	0.387358	Bin_2
DDB_G0274061	0.387416	Bin_2
DDB_G0268206	0.387903	Bin_2
DDB_G0290817	0.388881	Bin_2
DDB_G0268188	0.38976	Bin_2
DDB_G0277387	0.391035	Bin_2
DDB_G0286629	0.391438	Bin_2
DDB_G0285157	0.392407	Bin_2
DDB_G0287791	0.394945	Bin_2
DDB_G0295785	0.395542	Bin_2
DDB_G0267208	0.395744	Bin_2
DDB_G0279859	0.395847	Bin_2
DDB_G0281083	0.3961	Bin_2
DDB_G0291934	0.39661	Bin_2
DDB_G0287701	0.397328	Bin_2
DDB_G0276403	0.397337	Bin_2
DDB_G0292482	0.397385	Bin_2
DDB_G0281665	0.398971	Bin_2
DDB_G0270518	0.399318	Bin_2
DDB_G0287431	0.399439	Bin_2
DDB_G0271542	0.399916	Bin_2
DDB_G0267764	0.400016	Bin_2
DDB_G0289899	0.401372	Bin_2
DDB_G0286835	0.402312	Bin_2
DDB_G0277017	0.402484	Bin_2
DDB_G0269346	0.402711	Bin_2
DDB_G0285535	0.403656	Bin_2
DDB_G0283301	0.40371	Bin_2
DDB_G0269264	0.403961	Bin_2
DDB_G0283337	0.40419	Bin_2
DDB_G0290021	0.404775	Bin_2
DDB_G0274177	0.405964	Bin_2
DDB_G0271150	0.406131	Bin_2
DDB_G0271768	0.406269	Bin_2
DDB_G0283929	0.406673	Bin_2
DDB_G0276643	0.406801	Bin_2
DDB_G0268992	0.407607	Bin_2
DDB_G0276597	0.407882	Bin_2
DDB_G0288015	0.408241	Bin_2
DDB_G0278997	0.409091	Bin_2
DDB_G0288339	0.410072	Bin_2
DDB_G0272742	0.410224	Bin_2
DDB_G0275171	0.410268	Bin_2
DDB_G0280619	0.410393	Bin_2
DDB_G0284025	0.410657	Bin_2
DDB_G0290753	0.410665	Bin_2
DDB_G0283747	0.41164	Bin_2
DDB_G0285085	0.412266	Bin_2
DDB_G0283471	0.412838	Bin_2
DDB_G0290897	0.413326	Bin_2
DDB_G0281271	0.413745	Bin_2
DDB_G0282919	0.414073	Bin_2
DDB_G0290189	0.414292	Bin_2
DDB_G0289145	0.414569	Bin_2
DDB_G0282343	0.414797	Bin_2
DDB_G0282645	0.416347	Bin_2
DDB_G0277523	0.422004	Bin_2
DDB_G0275497	0.42326	Bin_2
DDB_G0290373	0.423354	Bin_2
DDB_G0274851	0.423363	Bin_2
DDB_G0282769	0.423411	Bin_2
DDB_G0267544	0.425776	Bin_2
DDB_G0274931	0.425892	Bin_2
DDB_G0282165	0.426619	Bin_2
DDB_G0277283	0.426813	Bin_2
DDB_G0282715	0.427347	Bin_2
DDB_G0274665	0.427701	Bin_2
DDB_G0283155	0.428199	Bin_2
DDB_G0267862	0.428992	Bin_2
DDB_G0280233	0.429284	Bin_2
DDB_G0271196	0.42935	Bin_2
DDB_G0292086	0.429658	Bin_2
DDB_G0275139	0.429995	Bin_2
DDB_G0268756	0.430246	Bin_2
DDB_G0272993	0.431007	Bin_2
DDB_G0277417	0.431053	Bin_2
DDB_G0288331	0.432285	Bin_2
DDB_G0275033	0.432857	Bin_2
DDB_G0291888	0.436222	Bin_2
DDB_G0285781	0.437172	Bin_2
DDB_G0273671	0.439086	Bin_2
DDB_G0280737	0.440613	Bin_2
DDB_G0268836	0.442355	Bin_2
DDB_G0282131	0.44392	Bin_2
DDB_G0290067	0.444539	Bin_2
DDB_G0267258	0.444593	Bin_2
DDB_G0293360	0.446271	Bin_2
DDB_G0280635	0.446298	Bin_2
DDB_G0290051	0.447139	Bin_2
DDB_G0281545	0.447678	Bin_2
DDB_G0273733	0.4498	Bin_2
DDB_G0293176	0.450873	Bin_2
DDB_G0285135	0.451089	Bin_2
DDB_G0269210	0.451134	Bin_2
DDB_G0290699	0.451811	Bin_2
DDB_G0288403	0.452128	Bin_2
DDB_G0277379	0.452245	Bin_2
DDB_G0290637	0.452919	Bin_2
DDB_G0282653	0.453781	Bin_2
DDB_G0272809	0.454331	Bin_2
DDB_G0293426	0.45504	Bin_2
DDB_G0268312	0.455436	Bin_2
DDB_G0288253	0.456468	Bin_2
DDB_G0268456	0.456497	Bin_2
DDB_G0277291	0.456528	Bin_2
DDB_G0291223	0.456829	Bin_2
DDB_G0268374	0.457313	Bin_2
DDB_G0295505	0.45794	Bin_2
DDB_G0276261	0.458589	Bin_2
DDB_G0272314	0.458976	Bin_2
DDB_G0289657	0.461049	Bin_2
DDB_G0274041	0.462505	Bin_2
DDB_G0274477	0.462887	Bin_2
DDB_G0270294	0.465501	Bin_2
DDB_G0286943	0.465679	Bin_2
DDB_G0288555	0.46576	Bin_2
DDB_G0284057	0.46611	Bin_2
DDB_G0284045	0.466488	Bin_2
DDB_G0274905	0.46677	Bin_2
DDB_G0274653	0.467164	Bin_2
DDB_G0295557	0.467574	Bin_2
DDB_G0278505	0.467906	Bin_2
DDB_G0287175	0.467987	Bin_2
DDB_G0293592	0.468392	Bin_2
DDB_G0271778	0.470054	Bin_2
DDB_G0292572	0.4702	Bin_2
DDB_G0286957	0.470221	Bin_2
DDB_G0279975	0.470737	Bin_2
DDB_G0283547	0.471303	Bin_2
DDB_G0275255	0.471308	Bin_2
DDB_G0284759	0.472537	Bin_2
DDB_G0271614	0.472691	Bin_2
DDB_G0277323	0.472761	Bin_2
DDB_G0277833	0.472848	Bin_2
DDB_G0294204	0.474727	Bin_2
DDB_G0292936	0.475042	Bin_2
DDB_G0293802	0.477455	Bin_2
DDB_G0269820	0.478986	Bin_2
DDB_G0270756	0.479267	Bin_2
DDB_G0282557	0.479552	Bin_2
DDB_G0286381	0.480659	Bin_2
DDB_G0287123	0.480785	Bin_2
DDB_G0285207	0.483378	Bin_2
DDB_G0280097	0.484082	Bin_2
DDB_G0288827	0.484123	Bin_2
DDB_G0270974	0.48436	Bin_2
DDB_G0290293	0.484709	Bin_2
DDB_G0290097	0.484867	Bin_2
DDB_G0289245	0.485005	Bin_2
DDB_G0291592	0.485317	Bin_2
DDB_G0289973	0.485576	Bin_2
DDB_G0289287	0.486085	Bin_2
DDB_G0280085	0.486194	Bin_2
DDB_G0284927	0.487122	Bin_2
DDB_G0270986	0.487865	Bin_2
DDB_G0276773	0.487879	Bin_2
DDB_G0276835	0.488737	Bin_2
DDB_G0281231	0.489795	Bin_2
DDB_G0291686	0.490943	Bin_2
DDB_G0282975	0.491058	Bin_2
DDB_G0289097	0.491954	Bin_2
DDB_G0267716	0.492846	Bin_2
DDB_G0267868	0.493155	Bin_2
DDB_G0285179	0.493857	Bin_2
DDB_G0272977	0.493898	Bin_2
DDB_G0272094	0.494283	Bin_2
DDB_G0271414	0.495383	Bin_2
DDB_G0277603	0.496178	Bin_2
DDB_G0286807	0.496626	Bin_2
DDB_G0292170	0.497138	Bin_2
DDB_G0293838	0.497155	Bin_2
DDB_G0280459	0.497982	Bin_2
DDB_G0281571	0.498639	Bin_2
DDB_G0286055	0.498892	Bin_2
DDB_G0283691	0.501084	Bin_2
DDB_G0276747	0.501862	Bin_2
DDB_G0291742	0.501916	Bin_2
DDB_G0280733	0.502038	Bin_2
DDB_G0281851	0.502442	Bin_2
DDB_G0277305	0.504354	Bin_2
DDB_G0295801	0.504716	Bin_2
DDB_G0291378	0.506442	Bin_2
DDB_G0272034	0.506465	Bin_2
DDB_G0270888	0.507284	Bin_2
DDB_G0284031	0.507595	Bin_2
DDB_G0276761	0.507667	Bin_2
DDB_G0270722	0.510143	Bin_2
DDB_G0271586	0.510684	Bin_2
DDB_G0271060	0.510716	Bin_2
DDB_G0295577	0.511248	Bin_2
DDB_G0267612	0.513026	Bin_2
DDB_G0269350	0.513617	Bin_2
DDB_G0270348	0.514009	Bin_2
DDB_G0278681	0.514118	Bin_2
DDB_G0285283	0.515648	Bin_2
DDB_G0281857	0.516155	Bin_2
DDB_G0270166	0.517454	Bin_2
DDB_G0290161	0.518479	Bin_2
DDB_G0290195	0.51879	Bin_2
DDB_G0269446	0.518919	Bin_2
DDB_G0278093	0.519345	Bin_2
DDB_G0277111	0.519458	Bin_2
DDB_G0280115	0.519761	Bin_2
DDB_G0291770	0.520175	Bin_2
DDB_G0295585	0.520217	Bin_2
DDB_G0276941	0.520531	Bin_2
DDB_G0277623	0.520673	Bin_2
DDB_G0273021	0.521426	Bin_2
DDB_G0275109	0.52204	Bin_2
DDB_G0271386	0.522192	Bin_2
DDB_G0282247	0.522658	Bin_2
DDB_G0292008	0.522779	Bin_2
DDB_G0279713	0.525543	Bin_2
DDB_G0285549	0.5257	Bin_2
DDB_G0294246	0.525958	Bin_2
DDB_G0289905	0.526173	Bin_2
DDB_G0289895	0.528855	Bin_2
DDB_G0269752	0.530472	Bin_2
DDB_G0280473	0.530536	Bin_2
DDB_G0275129	0.530545	Bin_2
DDB_G0284199	0.530963	Bin_2
DDB_G0272929	0.531278	Bin_2
DDB_G0275083	0.531975	Bin_2
DDB_G0287119	0.532631	Bin_2
DDB_G0270314	0.533817	Bin_2
DDB_G0279817	0.535815	Bin_2
DDB_G0280937	0.539401	Bin_2
DDB_G0294266	0.540156	Bin_2
DDB_G0277425	0.541872	Bin_2
DDB_G0268204	0.5425	Bin_2
DDB_G0283367	0.544909	Bin_2
DDB_G0280433	0.545693	Bin_2
DDB_G0274515	0.547909	Bin_2
DDB_G0267352	0.547943	Bin_2
DDB_G0292366	0.548746	Bin_2
DDB_G0279727	0.549178	Bin_2
DDB_G0291642	0.551077	Bin_2
DDB_G0292166	0.551875	Bin_2
DDB_G0283145	0.551885	Bin_2
DDB_G0285913	0.552771	Bin_2
DDB_G0286605	0.554083	Bin_2
DDB_G0293046	0.554343	Bin_2
DDB_G0281703	0.555444	Bin_2
DDB_G0272712	0.555847	Bin_2
DDB_G0272700	0.556538	Bin_2
DDB_G0271412	0.557029	Bin_2
DDB_G0286333	0.557486	Bin_2
DDB_G0290321	0.558336	Bin_2
DDB_G0283227	0.559667	Bin_2
DDB_G0286201	0.560061	Bin_2
DDB_G0286935	0.56042	Bin_2
DDB_G0288261	0.560496	Bin_2
DDB_G0284413	0.561352	Bin_2
DDB_G0286879	0.562534	Bin_2
DDB_G0284013	0.562591	Bin_2
DDB_G0290561	0.564492	Bin_2
DDB_G0275855	0.56642	Bin_2
DDB_G0283551	0.567104	Bin_2
DDB_G0274055	0.567727	Bin_2
DDB_G0288539	0.568047	Bin_2
DDB_G0281149	0.568372	Bin_2
DDB_G0280727	0.569817	Bin_2
DDB_G0292916	0.571052	Bin_2
DDB_G0267578	0.571704	Bin_2
DDB_G0290825	0.57185	Bin_2
DDB_G0288037	0.573326	Bin_2
DDB_G0286317	0.574419	Bin_2
DDB_G0288245	0.575361	Bin_2
DDB_G0288789	0.575378	Bin_2
DDB_G0284675	0.575405	Bin_2
DDB_G0274415	0.577513	Bin_2
DDB_G0268910	0.577991	Bin_2
DDB_G0282613	0.579127	Bin_2
DDB_G0276265	0.580524	Bin_2
DDB_G0271164	0.584799	Bin_2
DDB_G0272218	0.584975	Bin_2
DDB_G0275157	0.585959	Bin_2
DDB_G0269958	0.58698	Bin_2
DDB_G0278005	0.588272	Bin_2
DDB_G0281537	0.590143	Bin_2
DDB_G0271688	0.591295	Bin_2
DDB_G0289897	0.591702	Bin_2
DDB_G0284137	0.593404	Bin_2
DDB_G0270644	0.593519	Bin_2
DDB_G0295607	0.595459	Bin_2
DDB_G0275173	0.596829	Bin_2
DDB_G0290113	0.597631	Bin_2
DDB_G0289591	0.599858	Bin_2
DDB_G0290559	0.600198	Bin_2
DDB_G0287083	0.600234	Bin_2
DDB_G0275247	0.602607	Bin_2
DDB_G0272162	0.603629	Bin_2
DDB_G0268352	0.604589	Bin_2
DDB_G0283983	0.607064	Bin_2
DDB_G0271680	0.607868	Bin_2
DDB_G0289625	0.608955	Bin_2
DDB_G0292652	0.609265	Bin_2
DDB_G0284747	0.609509	Bin_2
DDB_G0271216	0.609623	Bin_2
DDB_G0283289	0.610859	Bin_2
DDB_G0291790	0.611348	Bin_2
DDB_G0270906	0.611913	Bin_2
DDB_G0268556	0.618275	Bin_2
DDB_G0272102	0.618544	Bin_2
DDB_G0270452	0.619354	Bin_2
DDB_G0278383	0.622421	Bin_2
DDB_G0281481	0.626463	Bin_2
DDB_G0281361	0.626948	Bin_2
DDB_G0292462	0.628045	Bin_2
DDB_G0277127	0.628834	Bin_2
DDB_G0285411	0.630384	Bin_2
DDB_G0281931	0.630476	Bin_2
DDB_G0268902	0.630858	Bin_2
DDB_G0289331	0.63158	Bin_2
DDB_G0285675	0.63175	Bin_2
DDB_G0290203	0.632012	Bin_2
DDB_G0293148	0.632158	Bin_2
DDB_G0274973	0.635286	Bin_2
DDB_G0283381	0.63656	Bin_2
DDB_G0289091	0.637801	Bin_2
DDB_G0268962	0.63907	Bin_2
DDB_G0293058	0.639688	Bin_2
DDB_G0273511	0.641219	Bin_2
DDB_G0283529	0.641527	Bin_2
DDB_G0271244	0.642266	Bin_2
DDB_G0275417	0.642356	Bin_2
DDB_G0284437	0.642486	Bin_2
DDB_G0272937	0.642874	Bin_2
DDB_G0289801	0.643622	Bin_2
DDB_G0277773	0.643989	Bin_2
DDB_G0277791	0.64558	Bin_2
DDB_G0294294	0.650074	Bin_2
DDB_G0286193	0.650247	Bin_2
DDB_G0278299	0.650345	Bin_2
DDB_G0280817	0.650877	Bin_2
DDB_G0268432	0.651009	Bin_2
DDB_G0283829	0.656399	Bin_2
DDB_G0283791	0.65642	Bin_2
DDB_G0271180	0.658282	Bin_2
DDB_G0274161	0.658778	Bin_2
DDB_G0271508	0.659293	Bin_2
DDB_G0276729	0.659914	Bin_2
DDB_G0293722	0.660545	Bin_2
DDB_G0294571	0.66229	Bin_2
DDB_G0293384	0.6628	Bin_2
DDB_G0273763	0.663128	Bin_2
DDB_G0271234	0.663773	Bin_2
DDB_G0277141	0.664213	Bin_2
DDB_G0291716	0.664315	Bin_2
DDB_G0281387	0.66432	Bin_2
DDB_G0274831	0.664375	Bin_2
DDB_G0268660	0.665722	Bin_2
DDB_G0290043	0.665754	Bin_2
DDB_G0278631	0.666219	Bin_2
DDB_G0267826	0.667259	Bin_2
DDB_G0290567	0.668535	Bin_2
DDB_G0274513	0.670844	Bin_2
DDB_G0277457	0.670931	Bin_2
DDB_G0291117	0.671027	Bin_2
DDB_G0282293	0.671086	Bin_2
DDB_G0288711	0.671227	Bin_2
DDB_G0273879	0.672065	Bin_2
DDB_G0292950	0.672322	Bin_2
DDB_G0279453	0.672534	Bin_2
DDB_G0292738	0.673517	Bin_2
DDB_G0281527	0.676625	Bin_2
DDB_G0281635	0.679268	Bin_2
DDB_G0292484	0.679772	Bin_2
DDB_G0293178	0.679972	Bin_2
DDB_G0291492	0.680529	Bin_2
DDB_G0281329	0.680748	Bin_2
DDB_G0271990	0.68314	Bin_2
DDB_G0272366	0.683363	Bin_2
DDB_G0286211	0.683817	Bin_2
DDB_G0289787	0.683972	Bin_2
DDB_G0285155	0.684814	Bin_2
DDB_G0276581	0.685828	Bin_2
DDB_G0281395	0.686903	Bin_2
DDB_G0288399	0.687711	Bin_2
DDB_G0277171	0.688509	Bin_2
DDB_G0278653	0.688651	Bin_2
DDB_G0270060	0.689201	Bin_2
DDB_G0269758	0.68982	Bin_2
DDB_G0281379	0.690166	Bin_2
DDB_G0277315	0.690185	Bin_2
DDB_G0289253	0.690389	Bin_2
DDB_G0269808	0.695067	Bin_2
DDB_G0283945	0.695457	Bin_2
DDB_G0276869	0.696152	Bin_2
DDB_G0267236	0.697117	Bin_2
DDB_G0287581	0.698604	Bin_2
DDB_G0289413	0.701785	Bin_2
DDB_G0290779	0.702013	Bin_2
DDB_G0291540	0.702459	Bin_2
DDB_G0273575	0.703065	Bin_2
DDB_G0272468	0.703259	Bin_2
DDB_G0293154	0.704259	Bin_2
DDB_G0278767	0.704614	Bin_2
DDB_G0276097	0.704903	Bin_2
DDB_G0279767	0.705044	Bin_2
DDB_G0291005	0.705999	Bin_2
DDB_G0280693	0.706127	Bin_2
DDB_G0280811	0.706818	Bin_2
DDB_G0287317	0.707534	Bin_2
DDB_G0269480	0.707797	Bin_2
DDB_G0289093	0.707947	Bin_2
DDB_G0269088	0.709174	Bin_2
DDB_G0282257	0.709802	Bin_2
DDB_G0287591	0.712244	Bin_2
DDB_G0272304	0.715063	Bin_2
DDB_G0291982	0.717512	Bin_2
DDB_G0272734	0.718851	Bin_2
DDB_G0290683	0.722314	Bin_2
DDB_G0283217	0.722405	Bin_2
DDB_G0276685	0.723533	Bin_2
DDB_G0274433	0.725564	Bin_2
DDB_G0283931	0.725684	Bin_2
DDB_G0279897	0.727302	Bin_2
DDB_G0284745	0.727998	Bin_2
DDB_G0282001	0.72826	Bin_2
DDB_G0286551	0.728479	Bin_2
DDB_G0285255	0.729157	Bin_2
DDB_G0268000	0.729543	Bin_2
DDB_G0276775	0.730231	Bin_2
DDB_G0274397	0.730305	Bin_2
DDB_G0282149	0.730951	Bin_2
DDB_G0293970	0.731039	Bin_2
DDB_G0282781	0.737267	Bin_2
DDB_G0270454	0.737506	Bin_2
DDB_G0282833	0.73842	Bin_2
DDB_G0289309	0.740528	Bin_2
DDB_G0291123	0.743078	Bin_2
DDB_G0294268	0.746269	Bin_2
DDB_G0289717	0.74709	Bin_2
DDB_G0291760	0.748588	Bin_2
DDB_G0295799	0.749315	Bin_2
DDB_G0275143	0.750302	Bin_2
DDB_G0289603	0.750488	Bin_2
DDB_G0291724	0.753056	Bin_2
DDB_G0281349	0.753756	Bin_2
DDB_G0290457	0.755155	Bin_2
DDB_G0291027	0.755192	Bin_2
DDB_G0269044	0.755467	Bin_2
DDB_G0271562	0.755644	Bin_2
DDB_G0287611	0.75694	Bin_2
DDB_G0274265	0.757838	Bin_2
DDB_G0290681	0.759772	Bin_2
DDB_G0280973	0.75998	Bin_2
DDB_G0280503	0.760304	Bin_2
DDB_G0294555	0.76033	Bin_2
DDB_G0279525	0.760655	Bin_2
DDB_G0286631	0.761142	Bin_2
DDB_G0292544	0.762845	Bin_2
DDB_G0275105	0.763131	Bin_2
DDB_G0284279	0.763654	Bin_2
DDB_G0288225	0.765188	Bin_2
DDB_G0271524	0.766522	Bin_2
DDB_G0293518	0.767328	Bin_2
DDB_G0291894	0.768132	Bin_2
DDB_G0292590	0.769392	Bin_2
DDB_G0284635	0.770487	Bin_2
DDB_G0280613	0.771996	Bin_2
DDB_G0292470	0.773649	Bin_2
DDB_G0289795	0.774786	Bin_2
DDB_G0282519	0.775577	Bin_2
DDB_G0291249	0.77601	Bin_2
DDB_G0278359	0.777719	Bin_2
DDB_G0285775	0.781053	Bin_2
DDB_G0276409	0.782892	Bin_2
DDB_G0287311	0.784693	Bin_2
DDB_G0278439	0.786362	Bin_2
DDB_G0271138	0.787568	Bin_2
DDB_G0288919	0.787923	Bin_2
DDB_G0269954	0.787933	Bin_2
DDB_G0273709	0.789008	Bin_2
DDB_G0285483	0.79032	Bin_2
DDB_G0284391	0.791715	Bin_2
DDB_G0295333	0.792278	Bin_2
DDB_G0292340	0.795155	Bin_2
DDB_G0295771	0.795899	Bin_2
DDB_G0286795	0.796559	Bin_2
DDB_G0285101	0.797162	Bin_2
DDB_G0285979	0.798707	Bin_2
DDB_G0277709	0.798978	Bin_2
DDB_G0291938	0.800119	Bin_2
DDB_G0279935	0.800756	Bin_2
DDB_G0287613	0.800763	Bin_2
DDB_G0274059	0.802744	Bin_2
DDB_G0292394	0.805272	Bin_2
DDB_G0290565	0.806119	Bin_2
DDB_G0273703	0.806904	Bin_2
DDB_G0279957	0.809549	Bin_2
DDB_G0290101	0.811547	Bin_2
DDB_G0270100	0.812037	Bin_2
DDB_G0281421	0.814915	Bin_2
DDB_G0279881	0.815439	Bin_2
DDB_G0282629	0.815573	Bin_2
DDB_G0286513	0.816979	Bin_2
DDB_G0290325	0.817847	Bin_2
DDB_G0278247	0.820089	Bin_2
DDB_G0284001	0.823261	Bin_2
DDB_G0285879	0.824491	Bin_2
DDB_G0273857	0.824552	Bin_2
DDB_G0281131	0.825505	Bin_2
DDB_G0279681	0.82633	Bin_2
DDB_G0291169	0.826822	Bin_2
DDB_G0274219	0.828707	Bin_2
DDB_G0276041	0.829466	Bin_2
DDB_G0292092	0.831031	Bin_2
DDB_G0280103	0.833394	Bin_2
DDB_G0269084	0.833493	Bin_2
DDB_G0295709	0.834416	Bin_2
DDB_G0282137	0.834933	Bin_2
DDB_G0291171	0.838197	Bin_2
DDB_G0288433	0.838272	Bin_2
DDB_G0268016	0.839671	Bin_2
DDB_G0272536	0.840829	Bin_2
DDB_G0290729	0.841158	Bin_2
DDB_G0283321	0.841855	Bin_2
DDB_G0285383	0.843107	Bin_2
DDB_G0284295	0.844957	Bin_2
DDB_G0278899	0.845266	Bin_2
DDB_G0290347	0.846393	Bin_2
DDB_G0272338	0.847854	Bin_2
DDB_G0271130	0.848228	Bin_2
DDB_G0289861	0.84835	Bin_2
DDB_G0269666	0.848799	Bin_2
DDB_G0286087	0.849996	Bin_2
DDB_G0282719	0.850091	Bin_2
DDB_G0281749	0.851838	Bin_2
DDB_G0294603	0.852464	Bin_2
DDB_G0289051	0.854037	Bin_2
DDB_G0293022	0.854256	Bin_2
DDB_G0269534	0.854548	Bin_2
DDB_G0292434	0.856954	Bin_2
DDB_G0282139	0.857412	Bin_2
DDB_G0289205	0.859235	Bin_2
DDB_G0286263	0.859363	Bin_2
DDB_G0293978	0.861016	Bin_2
DDB_G0287369	0.862987	Bin_2
DDB_G0282121	0.863848	Bin_2
DDB_G0290037	0.864077	Bin_2
DDB_G0290777	0.864168	Bin_2
DDB_G0281121	0.867437	Bin_2
DDB_G0284763	0.867539	Bin_2
DDB_G0288819	0.868512	Bin_2
DDB_G0293944	0.870502	Bin_2
DDB_G0288003	0.870807	Bin_2
DDB_G0280621	0.872471	Bin_2
DDB_G0279473	0.877811	Bin_2
DDB_G0286217	0.878981	Bin_2
DDB_G0276755	0.880743	Bin_2
DDB_G0272829	0.8809	Bin_2
DDB_G0289641	0.880953	Bin_2
DDB_G0274037	0.884141	Bin_2
DDB_G0280053	0.885506	Bin_2
DDB_G0289267	0.886211	Bin_2
DDB_G0276851	0.888501	Bin_2
DDB_G0286091	0.893712	Bin_2
DDB_G0290407	0.897997	Bin_2
DDB_G0277883	0.898834	Bin_2
DDB_G0291448	0.900144	Bin_2
DDB_G0272370	0.900908	Bin_2
DDB_G0283345	0.90254	Bin_2
DDB_G0272204	0.903852	Bin_2
DDB_G0283379	0.903898	Bin_2
DDB_G0280295	0.904601	Bin_2
DDB_G0269572	0.904744	Bin_2
DDB_G0293888	0.905073	Bin_2
DDB_G0293198	0.905377	Bin_2
DDB_G0276657	0.906563	Bin_2
DDB_G0275103	0.906755	Bin_2
DDB_G0268124	0.907934	Bin_2
DDB_G0290715	0.908376	Bin_2
DDB_G0291516	0.909057	Bin_2
DDB_G0293188	0.912013	Bin_2
DDB_G0285169	0.914317	Bin_2
DDB_G0288791	0.915543	Bin_2
DDB_G0272180	0.915799	Bin_2
DDB_G0284895	0.915879	Bin_2
DDB_G0285271	0.91625	Bin_2
DDB_G0267878	0.917797	Bin_2
DDB_G0286287	0.918072	Bin_2
DDB_G0284107	0.920491	Bin_2
DDB_G0287299	0.92081	Bin_2
DDB_G0289131	0.921006	Bin_2
DDB_G0281637	0.921816	Bin_2
DDB_G0276819	0.922862	Bin_2
DDB_G0287061	0.926207	Bin_2
DDB_G0271520	0.927088	Bin_2
DDB_G0270572	0.927849	Bin_2
DDB_G0276559	0.928115	Bin_2
DDB_G0289491	0.928753	Bin_2
DDB_G0280329	0.929374	Bin_2
DDB_G0287411	0.932582	Bin_2
DDB_G0279967	0.935212	Bin_2
DDB_G0279879	0.935714	Bin_2
DDB_G0277989	0.936029	Bin_2
DDB_G0270700	0.936502	Bin_2
DDB_G0291470	0.936888	Bin_2
DDB_G0280629	0.94256	Bin_2
DDB_G0286641	0.947467	Bin_2
DDB_G0281223	0.94762	Bin_2
DDB_G0283869	0.949661	Bin_2
DDB_G0287357	0.95229	Bin_2
DDB_G0280703	0.954014	Bin_2
DDB_G0281095	0.95614	Bin_2
DDB_G0274417	0.956165	Bin_2
DDB_G0283523	0.956295	Bin_2
DDB_G0268012	0.959644	Bin_2
DDB_G0268588	0.960499	Bin_2
DDB_G0293712	0.960681	Bin_2
DDB_G0271042	0.961055	Bin_2
DDB_G0275341	0.962159	Bin_2
DDB_G0292728	0.962454	Bin_2
DDB_G0287695	0.9637	Bin_2
DDB_G0268738	0.964315	Bin_2
DDB_G0269826	0.964827	Bin_2
DDB_G0279577	0.965406	Bin_2
DDB_G0294218	0.966419	Bin_2
DDB_G0280919	0.967826	Bin_2
DDB_G0280029	0.967995	Bin_2
DDB_G0278625	0.96987	Bin_2
DDB_G0293240	0.97037	Bin_2
DDB_G0270810	0.97139	Bin_2
DDB_G0285045	0.971485	Bin_2
DDB_G0281123	0.971732	Bin_2
DDB_G0290657	0.973118	Bin_2
DDB_G0272921	0.974155	Bin_2
DDB_G0288839	0.974853	Bin_2
DDB_G0279955	0.976022	Bin_2
DDB_G0269606	0.978107	Bin_2
DDB_G0282639	0.984398	Bin_2
DDB_G0276831	0.985375	Bin_2
DDB_G0272736	0.986965	Bin_2
DDB_G0272482	0.987251	Bin_2
DDB_G0290543	0.987821	Bin_2
DDB_G0292114	0.988049	Bin_2
DDB_G0276021	0.988734	Bin_2
DDB_G0274825	0.993737	Bin_2
DDB_G0272859	0.995435	Bin_2
DDB_G0283985	0.996407	Bin_2
DDB_G0292968	1.00011	Bin_2
DDB_G0287705	1.00111	Bin_2
DDB_G0290663	1.00113	Bin_2
DDB_G0280721	1.00413	Bin_2
DDB_G0284561	1.00573	Bin_2
DDB_G0283245	1.00706	Bin_2
DDB_G0285859	1.008	Bin_2
DDB_G0282843	1.01178	Bin_2
DDB_G0267562	1.01195	Bin_2
DDB_G0267658	1.01224	Bin_2
DDB_G0290923	1.01578	Bin_2
DDB_G0279253	1.01699	Bin_2
DDB_G0289659	1.01837	Bin_2
DDB_G0279383	1.02022	Bin_2
DDB_G0286385	1.02067	Bin_2
DDB_G0288681	1.02114	Bin_2
DDB_G0293826	1.02162	Bin_2
DDB_G0271802	1.02185	Bin_2
DDB_G0268788	1.02595	Bin_2
DDB_G0277201	1.0261	Bin_2
DDB_G0293542	1.02909	Bin_2
DDB_G0268246	1.02964	Bin_2
DDB_G0285171	1.03157	Bin_2
DDB_G0268212	1.03453	Bin_2
DDB_G0278563	1.03583	Bin_2
DDB_G0287499	1.03612	Bin_2
DDB_G0282003	1.03797	Bin_2
DDB_G0285009	1.0419	Bin_2
DDB_G0288793	1.04228	Bin_2
DDB_G0276157	1.04286	Bin_2
DDB_G0274895	1.04653	Bin_2
DDB_G0287987	1.04879	Bin_2
DDB_G0268280	1.04898	Bin_2
DDB_G0277693	1.04913	Bin_2
DDB_G0269698	1.05063	Bin_2
DDB_G0272100	1.05458	Bin_2
DDB_G0292094	1.05505	Bin_2
DDB_G0292190	1.05571	Bin_2
DDB_G0290109	1.05719	Bin_2
DDB_G0278463	1.05731	Bin_2
DDB_G0273675	1.05878	Bin_2
DDB_G0268446	1.05887	Bin_2
DDB_G0293536	1.05942	Bin_2
DDB_G0271092	1.05943	Bin_2
DDB_G0267398	1.06111	Bin_2
DDB_G0269222	1.06194	Bin_2
DDB_G0274165	1.06892	Bin_2
DDB_G0284991	1.06969	Bin_2
DDB_G0293098	1.07311	Bin_2
DDB_G0269888	1.07561	Bin_2
DDB_G0293610	1.07796	Bin_2
DDB_G0286741	1.0786	Bin_2
DDB_G0279359	1.07981	Bin_2
DDB_G0267762	1.08002	Bin_2
DDB_G0288963	1.08862	Bin_2
DDB_G0287931	1.08872	Bin_2
DDB_G0287599	1.08883	Bin_2
DDB_G0274571	1.08964	Bin_2
DDB_G0285771	1.09093	Bin_2
DDB_G0272752	1.09137	Bin_2
DDB_G0286863	1.09201	Bin_2
DDB_G0279599	1.09574	Bin_2
DDB_G0275237	1.09816	Bin_2
DDB_G0278127	1.0982	Bin_2
DDB_G0283423	1.09934	Bin_2
DDB_G0295775	1.09952	Bin_2
DDB_G0274731	1.09976	Bin_2
DDB_G0283787	1.10079	Bin_2
DDB_G0271214	1.1018	Bin_2
DDB_G0271194	1.10251	Bin_2
DDB_G0275019	1.10324	Bin_2
DDB_G0275203	1.10352	Bin_2
DDB_G0281767	1.10368	Bin_2
DDB_G0292292	1.10405	Bin_2
DDB_G0289647	1.10902	Bin_2
DDB_G0292196	1.11084	Bin_2
DDB_G0277817	1.1109	Bin_2
DDB_G0292790	1.11193	Bin_2
DDB_G0271698	1.11295	Bin_2
DDB_G0269074	1.11474	Bin_2
DDB_G0270704	1.11641	Bin_2
DDB_G0277831	1.11701	Bin_2
DDB_G0270448	1.11702	Bin_2
DDB_G0272979	1.11878	Bin_2
DDB_G0285183	1.11881	Bin_2
DDB_G0291968	1.11962	Bin_2
DDB_G0282093	1.12117	Bin_2
DDB_G0290539	1.12125	Bin_2
DDB_G0289845	1.12232	Bin_2
DDB_G0279983	1.12525	Bin_2
DDB_G0280633	1.12598	Bin_2
DDB_G0289737	1.12645	Bin_2
DDB_G0287899	1.12739	Bin_2
DDB_G0287829	1.12775	Bin_2
DDB_G0287207	1.12883	Bin_2
DDB_G0289753	1.13245	Bin_2
DDB_G0269920	1.13296	Bin_2
DDB_G0276203	1.1335	Bin_2
DDB_G0270306	1.13466	Bin_2
DDB_G0285445	1.13779	Bin_2
DDB_G0279885	1.13953	Bin_2
DDB_G0279583	1.14045	Bin_2
DDB_G0290645	1.14106	Bin_2
DDB_G0288981	1.14225	Bin_2
DDB_G0277063	1.14351	Bin_2
DDB_G0272024	1.14371	Bin_2
DDB_G0275789	1.14546	Bin_2
DDB_G0269620	1.14589	Bin_2
DDB_G0290709	1.14665	Bin_2
DDB_G0285721	1.14783	Bin_2
DDB_G0289271	1.14868	Bin_2
DDB_G0288397	1.14942	Bin_2
DDB_G0268744	1.14965	Bin_2
DDB_G0291714	1.1509	Bin_2
DDB_G0277767	1.15156	Bin_2
DDB_G0287535	1.15286	Bin_2
DDB_G0269592	1.15316	Bin_2
DDB_G0293486	1.15349	Bin_2
DDB_G0289401	1.15363	Bin_2
DDB_G0289507	1.15551	Bin_2
DDB_G0287323	1.15698	Bin_2
DDB_G0284377	1.15992	Bin_2
DDB_G0279471	1.1618	Bin_2
DDB_G0275287	1.16224	Bin_2
DDB_G0285769	1.16513	Bin_2
DDB_G0268376	1.16657	Bin_2
DDB_G0268622	1.16743	Bin_2
DDB_G0276035	1.16953	Bin_2
DDB_G0288815	1.16972	Bin_2
DDB_G0288029	1.17072	Bin_2
DDB_G0277937	1.17198	Bin_2
DDB_G0278393	1.17406	Bin_2
DDB_G0283933	1.17484	Bin_2
DDB_G0291524	1.17703	Bin_2
DDB_G0270062	1.18239	Bin_2
DDB_G0274047	1.18423	Bin_2
DDB_G0283887	1.18494	Bin_2
DDB_G0282747	1.19006	Bin_2
DDB_G0277447	1.19112	Bin_2
DDB_G0285165	1.19372	Bin_2
DDB_G0295689	1.19381	Bin_2
DDB_G0280829	1.19446	Bin_2
DDB_G0281761	1.19463	Bin_2
DDB_G0284859	1.19704	Bin_2
DDB_G0268546	1.1972	Bin_2
DDB_G0278915	1.20045	Bin_2
DDB_G0289939	1.20217	Bin_2
DDB_G0282985	1.20817	Bin_2
[truncated: 8,406 more rows]

## Sheet: H3K4me3_plot_data
position	value (peak density)	bin
-2500	0.000377442	1
-2499	0.000381545	1
-2498	0.000381545	1
-2497	0.000381545	1
-2496	0.000381545	1
-2495	0.000381545	1
-2494	0.000385647	1
-2493	0.000385647	1
-2492	0.000385647	1
-2491	0.000385647	1
-2490	0.000385647	1
-2489	0.000385647	1
-2488	0.000385647	1
-2487	0.000385647	1
-2486	0.000385647	1
-2485	0.000385647	1
-2484	0.000385647	1
-2483	0.000385647	1
-2482	0.000385647	1
-2481	0.00038975	1
-2480	0.00038975	1
-2479	0.00038975	1
-2478	0.00038975	1
-2477	0.00038975	1
-2476	0.00038975	1
-2475	0.00038975	1
-2474	0.00038975	1
-2473	0.000385647	1
-2472	0.000385647	1
-2471	0.000385647	1
-2470	0.000385647	1
-2469	0.000385647	1
-2468	0.000385647	1
-2467	0.000385647	1
-2466	0.000385647	1
-2465	0.000385647	1
-2464	0.000381545	1
-2463	0.000381545	1
-2462	0.000381545	1
-2461	0.000377442	1
-2460	0.000377442	1
-2459	0.000377442	1
-2458	0.000377442	1
-2457	0.000377442	1
-2456	0.000377442	1
-2455	0.000373339	1
-2454	0.000373339	1
-2453	0.000377442	1
-2452	0.000381545	1
-2451	0.000381545	1
-2450	0.000381545	1
-2449	0.000381545	1
-2448	0.000377442	1
-2447	0.000377442	1
-2446	0.000377442	1
-2445	0.000377442	1
-2444	0.000381545	1
-2443	0.000381545	1
-2442	0.000381545	1
-2441	0.000381545	1
-2440	0.000381545	1
-2439	0.000381545	1
-2438	0.000381545	1
-2437	0.000373339	1
-2436	0.000373339	1
-2435	0.000373339	1
-2434	0.000373339	1
-2433	0.000373339	1
-2432	0.000369237	1
-2431	0.000369237	1
-2430	0.000369237	1
-2429	0.000365134	1
-2428	0.000365134	1
-2427	0.000365134	1
-2426	0.000365134	1
-2425	0.000369237	1
-2424	0.000369237	1
-2423	0.000365134	1
-2422	0.000361032	1
-2421	0.000361032	1
-2420	0.000356929	1
-2419	0.000356929	1
-2418	0.000356929	1
-2417	0.000356929	1
-2416	0.000356929	1
-2415	0.000356929	1
-2414	0.000356929	1
-2413	0.000361032	1
-2412	0.000361032	1
-2411	0.000361032	1
-2410	0.000356929	1
-2409	0.000356929	1
-2408	0.000356929	1
-2407	0.000356929	1
-2406	0.000356929	1
-2405	0.000361032	1
-2404	0.000361032	1
-2403	0.000365134	1
-2402	0.000365134	1
-2401	0.000365134	1
-2400	0.000369237	1
-2399	0.000369237	1
-2398	0.000369237	1
-2397	0.000369237	1
-2396	0.000369237	1
-2395	0.000369237	1
-2394	0.000369237	1
-2393	0.000369237	1
-2392	0.000365134	1
-2391	0.000365134	1
-2390	0.000365134	1
-2389	0.000365134	1
-2388	0.000361032	1
-2387	0.000361032	1
-2386	0.000361032	1
-2385	0.000361032	1
-2384	0.000361032	1
-2383	0.000361032	1
-2382	0.000361032	1
-2381	0.000361032	1
-2380	0.000361032	1
-2379	0.000361032	1
-2378	0.000361032	1
-2377	0.000352826	1
-2376	0.000352826	1
-2375	0.000352826	1
-2374	0.000352826	1
-2373	0.000348724	1
-2372	0.000348724	1
-2371	0.000352826	1
-2370	0.000352826	1
-2369	0.000352826	1
-2368	0.000352826	1
-2367	0.000352826	1
-2366	0.000352826	1
-2365	0.000352826	1
-2364	0.000356929	1
-2363	0.000361032	1
-2362	0.000356929	1
-2361	0.000361032	1
-2360	0.000361032	1
-2359	0.000361032	1
-2358	0.000361032	1
-2357	0.000361032	1
-2356	0.000365134	1
-2355	0.000365134	1
-2354	0.000373339	1
-2353	0.000373339	1
-2352	0.000373339	1
-2351	0.000369237	1
-2350	0.000369237	1
-2349	0.000369237	1
-2348	0.000369237	1
-2347	0.000369237	1
-2346	0.000369237	1
-2345	0.000369237	1
-2344	0.000369237	1
-2343	0.000369237	1
-2342	0.000373339	1
-2341	0.000373339	1
-2340	0.000373339	1
-2339	0.000373339	1
-2338	0.000373339	1
-2337	0.000373339	1
-2336	0.000373339	1
-2335	0.000373339	1
-2334	0.000373339	1
-2333	0.000369237	1
-2332	0.000369237	1
-2331	0.000369237	1
-2330	0.000369237	1
-2329	0.000369237	1
-2328	0.000369237	1
-2327	0.000369237	1
-2326	0.000369237	1
-2325	0.000369237	1
-2324	0.000369237	1
-2323	0.000369237	1
-2322	0.000369237	1
-2321	0.000369237	1
-2320	0.000369237	1
-2319	0.000369237	1
-2318	0.000369237	1
-2317	0.000361032	1
-2316	0.000361032	1
-2315	0.000365134	1
-2314	0.000365134	1
-2313	0.000365134	1
-2312	0.000365134	1
-2311	0.000365134	1
-2310	0.000361032	1
-2309	0.000361032	1
-2308	0.000361032	1
-2307	0.000361032	1
-2306	0.000365134	1
-2305	0.000365134	1
-2304	0.000369237	1
-2303	0.000365134	1
-2302	0.000365134	1
-2301	0.000365134	1
-2300	0.000365134	1
-2299	0.000365134	1
-2298	0.000365134	1
-2297	0.000361032	1
-2296	0.000365134	1
-2295	0.000365134	1
-2294	0.000369237	1
-2293	0.000369237	1
-2292	0.000369237	1
-2291	0.000369237	1
-2290	0.000369237	1
-2289	0.000369237	1
-2288	0.000369237	1
-2287	0.000373339	1
-2286	0.000369237	1
-2285	0.000369237	1
-2284	0.000365134	1
-2283	0.000365134	1
-2282	0.000361032	1
-2281	0.000361032	1
-2280	0.000361032	1
-2279	0.000361032	1
-2278	0.000365134	1
-2277	0.000365134	1
-2276	0.000365134	1
-2275	0.000365134	1
-2274	0.000369237	1
-2273	0.000369237	1
-2272	0.000369237	1
-2271	0.000369237	1
-2270	0.000369237	1
-2269	0.000369237	1
-2268	0.000373339	1
-2267	0.000373339	1
-2266	0.000373339	1
-2265	0.000373339	1
-2264	0.000373339	1
-2263	0.000373339	1
-2262	0.000373339	1
-2261	0.000373339	1
-2260	0.000373339	1
-2259	0.000373339	1
-2258	0.000373339	1
-2257	0.000373339	1
-2256	0.000373339	1
-2255	0.000373339	1
-2254	0.000373339	1
-2253	0.000373339	1
-2252	0.000373339	1
-2251	0.000373339	1
-2250	0.000373339	1
-2249	0.000373339	1
-2248	0.000377442	1
-2247	0.000381545	1
-2246	0.000381545	1
-2245	0.000381545	1
-2244	0.000381545	1
-2243	0.000377442	1
-2242	0.000377442	1
-2241	0.000377442	1
-2240	0.000377442	1
-2239	0.000381545	1
-2238	0.000377442	1
-2237	0.000377442	1
-2236	0.000373339	1
-2235	0.000373339	1
-2234	0.000373339	1
-2233	0.000373339	1
-2232	0.000373339	1
-2231	0.000377442	1
-2230	0.000377442	1
-2229	0.000377442	1
-2228	0.000377442	1
-2227	0.000381545	1
-2226	0.000377442	1
-2225	0.000377442	1
-2224	0.000377442	1
-2223	0.000377442	1
-2222	0.000377442	1
-2221	0.000377442	1
-2220	0.000377442	1
-2219	0.000377442	1
-2218	0.000381545	1
-2217	0.000377442	1
-2216	0.000377442	1
-2215	0.000377442	1
-2214	0.000377442	1
-2213	0.000377442	1
-2212	0.000377442	1
-2211	0.000377442	1
-2210	0.000377442	1
-2209	0.000377442	1
-2208	0.000377442	1
-2207	0.000381545	1
-2206	0.000381545	1
-2205	0.000381545	1
-2204	0.000381545	1
-2203	0.000377442	1
-2202	0.000381545	1
-2201	0.000377442	1
-2200	0.000377442	1
-2199	0.000377442	1
-2198	0.000377442	1
-2197	0.000377442	1
-2196	0.000377442	1
-2195	0.000377442	1
-2194	0.000377442	1
-2193	0.000377442	1
-2192	0.000377442	1
-2191	0.000381545	1
-2190	0.000381545	1
-2189	0.000381545	1
-2188	0.000381545	1
-2187	0.000381545	1
-2186	0.000373339	1
-2185	0.000373339	1
-2184	0.000369237	1
-2183	0.000369237	1
-2182	0.000369237	1
-2181	0.000373339	1
-2180	0.000373339	1
-2179	0.000373339	1
-2178	0.000373339	1
-2177	0.000373339	1
-2176	0.000373339	1
-2175	0.000373339	1
-2174	0.000373339	1
-2173	0.000377442	1
-2172	0.000377442	1
-2171	0.000377442	1
-2170	0.000377442	1
-2169	0.000377442	1
-2168	0.000377442	1
-2167	0.000377442	1
-2166	0.000377442	1
-2165	0.000373339	1
-2164	0.000373339	1
-2163	0.000373339	1
-2162	0.000373339	1
-2161	0.000377442	1
-2160	0.000373339	1
-2159	0.000373339	1
-2158	0.000373339	1
-2157	0.000373339	1
-2156	0.000373339	1
-2155	0.000373339	1
-2154	0.000373339	1
-2153	0.000373339	1
-2152	0.000377442	1
-2151	0.000377442	1
-2150	0.000377442	1
-2149	0.000377442	1
-2148	0.000377442	1
-2147	0.000377442	1
-2146	0.000377442	1
-2145	0.000381545	1
-2144	0.000381545	1
-2143	0.000381545	1
-2142	0.000385647	1
-2141	0.000385647	1
-2140	0.000377442	1
-2139	0.000377442	1
-2138	0.000377442	1
-2137	0.000377442	1
-2136	0.000377442	1
-2135	0.000377442	1
-2134	0.000377442	1
-2133	0.000377442	1
-2132	0.000377442	1
-2131	0.000377442	1
-2130	0.000377442	1
-2129	0.000377442	1
-2128	0.000381545	1
-2127	0.000381545	1
-2126	0.000385647	1
-2125	0.000385647	1
-2124	0.000381545	1
-2123	0.000381545	1
-2122	0.000385647	1
-2121	0.000385647	1
-2120	0.000385647	1
-2119	0.000381545	1
-2118	0.000381545	1
-2117	0.000381545	1
-2116	0.000381545	1
-2115	0.000381545	1
-2114	0.000381545	1
-2113	0.000381545	1
-2112	0.000381545	1
-2111	0.000381545	1
-2110	0.000381545	1
-2109	0.000385647	1
-2108	0.00038975	1
-2107	0.00038975	1
-2106	0.00038975	1
-2105	0.000393853	1
-2104	0.000393853	1
-2103	0.000393853	1
-2102	0.000393853	1
-2101	0.000393853	1
-2100	0.000393853	1
-2099	0.000397955	1
-2098	0.000397955	1
-2097	0.000397955	1
-2096	0.000397955	1
-2095	0.000393853	1
-2094	0.000397955	1
-2093	0.000397955	1
-2092	0.000397955	1
-2091	0.000397955	1
-2090	0.000397955	1
-2089	0.000402058	1
-2088	0.000402058	1
-2087	0.000402058	1
-2086	0.000402058	1
-2085	0.000397955	1
-2084	0.000397955	1
-2083	0.000397955	1
-2082	0.000393853	1
-2081	0.000393853	1
-2080	0.000385647	1
-2079	0.000385647	1
-2078	0.000385647	1
-2077	0.000385647	1
-2076	0.000385647	1
-2075	0.000385647	1
-2074	0.000381545	1
-2073	0.000385647	1
-2072	0.000385647	1
-2071	0.000385647	1
-2070	0.000385647	1
-2069	0.000385647	1
-2068	0.00038975	1
-2067	0.000385647	1
-2066	0.000385647	1
-2065	0.000385647	1
-2064	0.000385647	1
-2063	0.000385647	1
-2062	0.000385647	1
-2061	0.000385647	1
-2060	0.000385647	1
-2059	0.000385647	1
-2058	0.000385647	1
-2057	0.000385647	1
-2056	0.00038975	1
-2055	0.000385647	1
-2054	0.000385647	1
-2053	0.000385647	1
-2052	0.000385647	1
-2051	0.000385647	1
-2050	0.000385647	1
-2049	0.000385647	1
-2048	0.00038975	1
-2047	0.00038975	1
-2046	0.00038975	1
-2045	0.00038975	1
-2044	0.00038975	1
-2043	0.00038975	1
-2042	0.00038975	1
-2041	0.00038975	1
-2040	0.000393853	1
-2039	0.000393853	1
-2038	0.000393853	1
-2037	0.000393853	1
-2036	0.000393853	1
-2035	0.00038975	1
-2034	0.00038975	1
-2033	0.00038975	1
-2032	0.00038975	1
-2031	0.00038975	1
-2030	0.000385647	1
-2029	0.000385647	1
-2028	0.000385647	1
-2027	0.000385647	1
-2026	0.000385647	1
-2025	0.000381545	1
-2024	0.000377442	1
-2023	0.000377442	1
-2022	0.000381545	1
-2021	0.000381545	1
-2020	0.000381545	1
-2019	0.000381545	1
-2018	0.000381545	1
-2017	0.000381545	1
-2016	0.000381545	1
-2015	0.000381545	1
-2014	0.000381545	1
-2013	0.000381545	1
-2012	0.00038975	1
-2011	0.00038975	1
-2010	0.00038975	1
-2009	0.000393853	1
-2008	0.00038975	1
-2007	0.00038975	1
-2006	0.00038975	1
-2005	0.00038975	1
-2004	0.00038975	1
-2003	0.00038975	1
-2002	0.000393853	1
-2001	0.000393853	1
-2000	0.000393853	1
-1999	0.000393853	1
-1998	0.000393853	1
-1997	0.000393853	1
-1996	0.000393853	1
-1995	0.000393853	1
-1994	0.000393853	1
-1993	0.000393853	1
-1992	0.000397955	1
-1991	0.000397955	1
-1990	0.000397955	1
-1989	0.000397955	1
-1988	0.000397955	1
-1987	0.000397955	1
-1986	0.000402058	1
-1985	0.000402058	1
-1984	0.000402058	1
-1983	0.000402058	1
-1982	0.000402058	1
-1981	0.000402058	1
-1980	0.000397955	1
-1979	0.000397955	1
-1978	0.000397955	1
-1977	0.000397955	1
-1976	0.000397955	1
-1975	0.000402058	1
-1974	0.000406161	1
-1973	0.000406161	1
-1972	0.000406161	1
-1971	0.000406161	1
-1970	0.000406161	1
-1969	0.000410263	1
-1968	0.000410263	1
-1967	0.000410263	1
-1966	0.000410263	1
-1965	0.000410263	1
-1964	0.000410263	1
-1963	0.000410263	1
-1962	0.000406161	1
-1961	0.000406161	1
-1960	0.000406161	1
-1959	0.000402058	1
-1958	0.000406161	1
-1957	0.000406161	1
-1956	0.000406161	1
-1955	0.000410263	1
-1954	0.000406161	1
-1953	0.000406161	1
-1952	0.000410263	1
-1951	0.000410263	1
-1950	0.000414366	1
-1949	0.000414366	1
-1948	0.000414366	1
-1947	0.000414366	1
-1946	0.000414366	1
-1945	0.000414366	1
-1944	0.000414366	1
-1943	0.000414366	1
-1942	0.000414366	1
-1941	0.000418468	1
-1940	0.000426674	1
-1939	0.000426674	1
-1938	0.000426674	1
-1937	0.000426674	1
-1936	0.000422571	1
-1935	0.000422571	1
-1934	0.000418468	1
-1933	0.000422571	1
-1932	0.000422571	1
-1931	0.000418468	1
-1930	0.000418468	1
-1929	0.000418468	1
-1928	0.000418468	1
-1927	0.000418468	1
-1926	0.000422571	1
-1925	0.000422571	1
-1924	0.000422571	1
-1923	0.000418468	1
-1922	0.000418468	1
-1921	0.000418468	1
-1920	0.000418468	1
-1919	0.000418468	1
-1918	0.000418468	1
-1917	0.000418468	1
-1916	0.000418468	1
-1915	0.000418468	1
-1914	0.000418468	1
-1913	0.000414366	1
-1912	0.000414366	1
-1911	0.000410263	1
-1910	0.000406161	1
-1909	0.000406161	1
-1908	0.000406161	1
-1907	0.000402058	1
-1906	0.000402058	1
-1905	0.000402058	1
-1904	0.000402058	1
-1903	0.000402058	1
-1902	0.000402058	1
-1901	0.000406161	1
-1900	0.000406161	1
-1899	0.000406161	1
-1898	0.000406161	1
-1897	0.000406161	1
-1896	0.000406161	1
-1895	0.000406161	1
-1894	0.000410263	1
-1893	0.000410263	1
-1892	0.000410263	1
-1891	0.000406161	1
-1890	0.000406161	1
-1889	0.000406161	1
-1888	0.000402058	1
-1887	0.000402058	1
-1886	0.000402058	1
-1885	0.000402058	1
-1884	0.000402058	1
-1883	0.000402058	1
-1882	0.000402058	1
-1881	0.000402058	1
-1880	0.000402058	1
-1879	0.000402058	1
-1878	0.000402058	1
-1877	0.000402058	1
-1876	0.000402058	1
-1875	0.000402058	1
-1874	0.000402058	1
-1873	0.000402058	1
-1872	0.000406161	1
-1871	0.000406161	1
-1870	0.000410263	1
-1869	0.000410263	1
-1868	0.000410263	1
-1867	0.000410263	1
-1866	0.000406161	1
-1865	0.000410263	1
-1864	0.000410263	1
-1863	0.000410263	1
-1862	0.000414366	1
-1861	0.000414366	1
-1860	0.000414366	1
-1859	0.000414366	1
-1858	0.000414366	1
-1857	0.000414366	1
-1856	0.000414366	1
-1855	0.000418468	1
-1854	0.000414366	1
-1853	0.000414366	1
-1852	0.000418468	1
-1851	0.000418468	1
-1850	0.000422571	1
-1849	0.000422571	1
-1848	0.000422571	1
-1847	0.000418468	1
-1846	0.000418468	1
-1845	0.000418468	1
-1844	0.000418468	1
-1843	0.000418468	1
-1842	0.000418468	1
-1841	0.000418468	1
-1840	0.000418468	1
-1839	0.000418468	1
-1838	0.000418468	1
-1837	0.000418468	1
-1836	0.000414366	1
-1835	0.000414366	1
-1834	0.000414366	1
-1833	0.000422571	1
-1832	0.000422571	1
-1831	0.000422571	1
-1830	0.000422571	1
-1829	0.000422571	1
-1828	0.000422571	1
-1827	0.000422571	1
-1826	0.000422571	1
-1825	0.000422571	1
-1824	0.000418468	1
-1823	0.000414366	1
-1822	0.000414366	1
-1821	0.000414366	1
-1820	0.000414366	1
-1819	0.000414366	1
-1818	0.000414366	1
-1817	0.000414366	1
-1816	0.000418468	1
-1815	0.000418468	1
-1814	0.000418468	1
-1813	0.000418468	1
-1812	0.000418468	1
-1811	0.000418468	1
-1810	0.000418468	1
-1809	0.000422571	1
-1808	0.000426674	1
-1807	0.000426674	1
-1806	0.000426674	1
-1805	0.000426674	1
-1804	0.000426674	1
-1803	0.000426674	1
-1802	0.000426674	1
-1801	0.000426674	1
-1800	0.000426674	1
-1799	0.000434879	1
-1798	0.000434879	1
-1797	0.000438982	1
-1796	0.000438982	1
-1795	0.000438982	1
-1794	0.000438982	1
-1793	0.000438982	1
-1792	0.000438982	1
-1791	0.000438982	1
-1790	0.000434879	1
-1789	0.000434879	1
-1788	0.000434879	1
-1787	0.000434879	1
-1786	0.000434879	1
-1785	0.000434879	1
-1784	0.000434879	1
-1783	0.000434879	1
-1782	0.000434879	1
-1781	0.000434879	1
-1780	0.000430776	1
-1779	0.000434879	1
-1778	0.000438982	1
-1777	0.000443084	1
-1776	0.000443084	1
-1775	0.000443084	1
-1774	0.000443084	1
-1773	0.000443084	1
-1772	0.000443084	1
-1771	0.000443084	1
-1770	0.000443084	1
-1769	0.000443084	1
-1768	0.000443084	1
-1767	0.000443084	1
-1766	0.000443084	1
-1765	0.000443084	1
-1764	0.000438982	1
-1763	0.000438982	1
-1762	0.000438982	1
-1761	0.000438982	1
-1760	0.000443084	1
-1759	0.000438982	1
-1758	0.000438982	1
-1757	0.000434879	1
-1756	0.000434879	1
-1755	0.000434879	1
-1754	0.000438982	1
-1753	0.000438982	1
-1752	0.000438982	1
-1751	0.000443084	1
-1750	0.000443084	1
-1749	0.000443084	1
-1748	0.000443084	1
-1747	0.000438982	1
-1746	0.000438982	1
-1745	0.000438982	1
-1744	0.000438982	1
-1743	0.000438982	1
-1742	0.000443084	1
-1741	0.000443084	1
-1740	0.000443084	1
-1739	0.000443084	1
-1738	0.000443084	1
-1737	0.000443084	1
-1736	0.000443084	1
-1735	0.000443084	1
-1734	0.000443084	1
-1733	0.000438982	1
-1732	0.000438982	1
-1731	0.000443084	1
-1730	0.000443084	1
-1729	0.000443084	1
-1728	0.000443084	1
-1727	0.000443084	1
-1726	0.000443084	1
-1725	0.000447187	1
-1724	0.000447187	1
-1723	0.000443084	1
-1722	0.000443084	1
-1721	0.000438982	1
-1720	0.000443084	1
-1719	0.000438982	1
-1718	0.000438982	1
-1717	0.000443084	1
-1716	0.000447187	1
-1715	0.000451289	1
-1714	0.000451289	1
-1713	0.000451289	1
-1712	0.000451289	1
-1711	0.000451289	1
-1710	0.000451289	1
-1709	0.000451289	1
-1708	0.000447187	1
-1707	0.000447187	1
-1706	0.000451289	1
-1705	0.000447187	1
-1704	0.000443084	1
-1703	0.000447187	1
-1702	0.000451289	1
-1701	0.000451289	1
-1700	0.000451289	1
-1699	0.000451289	1
-1698	0.000443084	1
-1697	0.000443084	1
-1696	0.000443084	1
-1695	0.000434879	1
-1694	0.000434879	1
-1693	0.000434879	1
-1692	0.000434879	1
-1691	0.000434879	1
-1690	0.000434879	1
-1689	0.000434879	1
-1688	0.000434879	1
-1687	0.000434879	1
-1686	0.000438982	1
-1685	0.000438982	1
-1684	0.000438982	1
-1683	0.000434879	1
-1682	0.000434879	1
-1681	0.000434879	1
-1680	0.000434879	1
-1679	0.000434879	1
-1678	0.000430776	1
-1677	0.000430776	1
-1676	0.000434879	1
-1675	0.000434879	1
-1674	0.000434879	1
-1673	0.000434879	1
-1672	0.000434879	1
-1671	0.000430776	1
-1670	0.000430776	1
-1669	0.000430776	1
-1668	0.000430776	1
-1667	0.000426674	1
-1666	0.000426674	1
-1665	0.000426674	1
-1664	0.000426674	1
-1663	0.000426674	1
-1662	0.000422571	1
-1661	0.000426674	1
-1660	0.000426674	1
-1659	0.000426674	1
-1658	0.000426674	1
-1657	0.000430776	1
-1656	0.000430776	1
-1655	0.000430776	1
-1654	0.000430776	1
-1653	0.000430776	1
-1652	0.000430776	1
-1651	0.000430776	1
-1650	0.000430776	1
-1649	0.000430776	1
-1648	0.000430776	1
-1647	0.000430776	1
-1646	0.000430776	1
-1645	0.000430776	1
-1644	0.000430776	1
-1643	0.000430776	1
-1642	0.000430776	1
-1641	0.000430776	1
-1640	0.000434879	1
-1639	0.000434879	1
-1638	0.000434879	1
-1637	0.000434879	1
-1636	0.000434879	1
-1635	0.000430776	1
-1634	0.000430776	1
-1633	0.000430776	1
-1632	0.000430776	1
-1631	0.000430776	1
-1630	0.000430776	1
-1629	0.000430776	1
-1628	0.000434879	1
-1627	0.000434879	1
-1626	0.000438982	1
-1625	0.000438982	1
-1624	0.000438982	1
-1623	0.000434879	1
-1622	0.000430776	1
-1621	0.000426674	1
-1620	0.000422571	1
-1619	0.000418468	1
-1618	0.000418468	1
-1617	0.000418468	1
-1616	0.000418468	1
-1615	0.000418468	1
-1614	0.000418468	1
-1613	0.000414366	1
-1612	0.000414366	1
-1611	0.000418468	1
-1610	0.000418468	1
-1609	0.000422571	1
-1608	0.000422571	1
-1607	0.000418468	1
-1606	0.000414366	1
-1605	0.000418468	1
-1604	0.000418468	1
-1603	0.000418468	1
-1602	0.000418468	1
-1601	0.000418468	1
-1600	0.000418468	1
-1599	0.000418468	1
-1598	0.000422571	1
-1597	0.000422571	1
-1596	0.000422571	1
-1595	0.000422571	1
-1594	0.000422571	1
-1593	0.000422571	1
-1592	0.000422571	1
-1591	0.000422571	1
-1590	0.000422571	1
-1589	0.000422571	1
-1588	0.000422571	1
-1587	0.000418468	1
-1586	0.000418468	1
-1585	0.000418468	1
-1584	0.000418468	1
-1583	0.000418468	1
-1582	0.000418468	1
-1581	0.000414366	1
-1580	0.000414366	1
-1579	0.000414366	1
-1578	0.000414366	1
-1577	0.000414366	1
-1576	0.000414366	1
-1575	0.000414366	1
-1574	0.000414366	1
-1573	0.000410263	1
-1572	0.000410263	1
-1571	0.000410263	1
-1570	0.000410263	1
-1569	0.000410263	1
-1568	0.000406161	1
-1567	0.000406161	1
-1566	0.000406161	1
-1565	0.000402058	1
-1564	0.000402058	1
-1563	0.000402058	1
-1562	0.000402058	1
-1561	0.000397955	1
-1560	0.000397955	1
-1559	0.000393853	1
-1558	0.000393853	1
-1557	0.000393853	1
-1556	0.00038975	1
-1555	0.000393853	1
-1554	0.000397955	1
-1553	0.000397955	1
-1552	0.000402058	1
-1551	0.000397955	1
-1550	0.000397955	1
-1549	0.000397955	1
-1548	0.000397955	1
-1547	0.000397955	1
-1546	0.000397955	1
-1545	0.000397955	1
-1544	0.000397955	1
-1543	0.000397955	1
-1542	0.00038975	1
-1541	0.00038975	1
-1540	0.00038975	1
-1539	0.00038975	1
-1538	0.000393853	1
-1537	0.000393853	1
-1536	0.000393853	1
-1535	0.00038975	1
-1534	0.00038975	1
-1533	0.00038975	1
-1532	0.00038975	1
-1531	0.00038975	1
-1530	0.000385647	1
-1529	0.000385647	1
-1528	0.000385647	1
-1527	0.000385647	1
-1526	0.000385647	1
-1525	0.000385647	1
-1524	0.000385647	1
-1523	0.000385647	1
-1522	0.000385647	1
-1521	0.000385647	1
-1520	0.000385647	1
-1519	0.000385647	1
-1518	0.00038975	1
-1517	0.00038975	1
-1516	0.00038975	1
-1515	0.00038975	1
-1514	0.00038975	1
-1513	0.00038975	1
-1512	0.00038975	1
-1511	0.00038975	1
-1510	0.000385647	1
-1509	0.000385647	1
-1508	0.000385647	1
-1507	0.000385647	1
-1506	0.000385647	1
-1505	0.00038975	1
-1504	0.00038975	1
-1503	0.00038975	1
-1502	0.00038975	1
-1501	0.00038975	1
-1500	0.00038975	1
-1499	0.00038975	1
-1498	0.00038975	1
-1497	0.00038975	1
-1496	0.00038975	1
-1495	0.00038975	1
-1494	0.00038975	1
-1493	0.00038975	1
-1492	0.00038975	1
-1491	0.000393853	1
-1490	0.000393853	1
-1489	0.000393853	1
-1488	0.000393853	1
-1487	0.000393853	1
-1486	0.000393853	1
-1485	0.000393853	1
-1484	0.000393853	1
-1483	0.000393853	1
-1482	0.000393853	1
-1481	0.00038975	1
-1480	0.00038975	1
-1479	0.000393853	1
-1478	0.000393853	1
-1477	0.00038975	1
-1476	0.00038975	1
-1475	0.00038975	1
-1474	0.00038975	1
-1473	0.000393853	1
-1472	0.000393853	1
-1471	0.000393853	1
-1470	0.000393853	1
-1469	0.000393853	1
-1468	0.000393853	1
-1467	0.000393853	1
-1466	0.000397955	1
-1465	0.000397955	1
-1464	0.000397955	1
-1463	0.000397955	1
-1462	0.000397955	1
-1461	0.000397955	1
-1460	0.000397955	1
-1459	0.000402058	1
-1458	0.000402058	1
-1457	0.000402058	1
-1456	0.000402058	1
-1455	0.000406161	1
-1454	0.000406161	1
-1453	0.000406161	1
-1452	0.000410263	1
-1451	0.000410263	1
-1450	0.000410263	1
-1449	0.000410263	1
-1448	0.000402058	1
-1447	0.000402058	1
-1446	0.000402058	1
-1445	0.000397955	1
-1444	0.000397955	1
-1443	0.000393853	1
-1442	0.000393853	1
-1441	0.000393853	1
-1440	0.000393853	1
-1439	0.000393853	1
-1438	0.00038975	1
-1437	0.00038975	1
-1436	0.00038975	1
-1435	0.00038975	1
-1434	0.00038975	1
-1433	0.00038975	1
-1432	0.00038975	1
-1431	0.00038975	1
-1430	0.00038975	1
-1429	0.00038975	1
-1428	0.00038975	1
-1427	0.00038975	1
-1426	0.000385647	1
-1425	0.000385647	1
-1424	0.000385647	1
-1423	0.000385647	1
-1422	0.000385647	1
-1421	0.000385647	1
-1420	0.000385647	1
-1419	0.000385647	1
-1418	0.000385647	1
-1417	0.000385647	1
-1416	0.000385647	1
-1415	0.000385647	1
-1414	0.000385647	1
-1413	0.000385647	1
-1412	0.000385647	1
-1411	0.000385647	1
-1410	0.000393853	1
-1409	0.000393853	1
-1408	0.00038975	1
-1407	0.00038975	1
-1406	0.00038975	1
-1405	0.00038975	1
-1404	0.000385647	1
-1403	0.00038975	1
-1402	0.00038975	1
-1401	0.00038975	1
-1400	0.000385647	1
-1399	0.000385647	1
-1398	0.000385647	1
-1397	0.000381545	1
-1396	0.000377442	1
-1395	0.000377442	1
-1394	0.000377442	1
-1393	0.000377442	1
-1392	0.000377442	1
-1391	0.000369237	1
-1390	0.000369237	1
-1389	0.000369237	1
-1388	0.000365134	1
-1387	0.000365134	1
-1386	0.000365134	1
-1385	0.000365134	1
-1384	0.000361032	1
-1383	0.000356929	1
-1382	0.000356929	1
-1381	0.000356929	1
-1380	0.000356929	1
-1379	0.000356929	1
-1378	0.000361032	1
-1377	0.000361032	1
-1376	0.000361032	1
-1375	0.000361032	1
-1374	0.000361032	1
-1373	0.000361032	1
-1372	0.000361032	1
-1371	0.000361032	1
-1370	0.000361032	1
-1369	0.000361032	1
-1368	0.000361032	1
-1367	0.000361032	1
-1366	0.000356929	1
-1365	0.000356929	1
-1364	0.000356929	1
-1363	0.000352826	1
-1362	0.000352826	1
-1361	0.000352826	1
-1360	0.000352826	1
-1359	0.000352826	1
-1358	0.000348724	1
-1357	0.000348724	1
-1356	0.000348724	1
-1355	0.000348724	1
-1354	0.000348724	1
-1353	0.000348724	1
-1352	0.000348724	1
-1351	0.000348724	1
-1350	0.000348724	1
-1349	0.000352826	1
-1348	0.000352826	1
-1347	0.000348724	1
-1346	0.000348724	1
-1345	0.000352826	1
-1344	0.000352826	1
-1343	0.000352826	1
-1342	0.000352826	1
-1341	0.000356929	1
-1340	0.000356929	1
-1339	0.000356929	1
-1338	0.000356929	1
-1337	0.000356929	1
-1336	0.000356929	1
-1335	0.000356929	1
-1334	0.000356929	1
-1333	0.000352826	1
-1332	0.000352826	1
-1331	0.000352826	1
-1330	0.000352826	1
-1329	0.000356929	1
-1328	0.000352826	1
-1327	0.000352826	1
-1326	0.000352826	1
-1325	0.000352826	1
-1324	0.000352826	1
-1323	0.000352826	1
-1322	0.000356929	1
-1321	0.000356929	1
-1320	0.000356929	1
-1319	0.000356929	1
-1318	0.000356929	1
-1317	0.000356929	1
-1316	0.000361032	1
-1315	0.000361032	1
-1314	0.000361032	1
-1313	0.000361032	1
-1312	0.000361032	1
-1311	0.000361032	1
-1310	0.000361032	1
-1309	0.000361032	1
-1308	0.000361032	1
-1307	0.000361032	1
-1306	0.000361032	1
-1305	0.000361032	1
-1304	0.000365134	1
-1303	0.000365134	1
-1302	0.000365134	1
-1301	0.000365134	1
-1300	0.000361032	1
-1299	0.000365134	1
-1298	0.000365134	1
-1297	0.000361032	1
-1296	0.000361032	1
-1295	0.000356929	1
-1294	0.000356929	1
-1293	0.000352826	1
-1292	0.000352826	1
-1291	0.000348724	1
-1290	0.000348724	1
-1289	0.000348724	1
-1288	0.000348724	1
-1287	0.000348724	1
-1286	0.000348724	1
-1285	0.000348724	1
-1284	0.000348724	1
-1283	0.000348724	1
-1282	0.000344621	1
-1281	0.000344621	1
-1280	0.000344621	1
-1279	0.000344621	1
-1278	0.000344621	1
-1277	0.000344621	1
-1276	0.000344621	1
-1275	0.000344621	1
-1274	0.000344621	1
-1273	0.000344621	1
-1272	0.000348724	1
-1271	0.000348724	1
-1270	0.000348724	1
-1269	0.000344621	1
-1268	0.000344621	1
-1267	0.000344621	1
-1266	0.000344621	1
-1265	0.000344621	1
-1264	0.000344621	1
-1263	0.000344621	1
-1262	0.000344621	1
-1261	0.000344621	1
-1260	0.000344621	1
-1259	0.000344621	1
-1258	0.000344621	1
-1257	0.000344621	1
-1256	0.000344621	1
-1255	0.000344621	1
-1254	0.000344621	1
-1253	0.000344621	1
-1252	0.000344621	1
-1251	0.000344621	1
-1250	0.000344621	1
-1249	0.000344621	1
-1248	0.000344621	1
-1247	0.000344621	1
-1246	0.000344621	1
-1245	0.000344621	1
-1244	0.000344621	1
-1243	0.000344621	1
-1242	0.000344621	1
-1241	0.000344621	1
-1240	0.000344621	1
-1239	0.000340518	1
-1238	0.000340518	1
-1237	0.000340518	1
-1236	0.000348724	1
-1235	0.000344621	1
-1234	0.000340518	1
-1233	0.000344621	1
-1232	0.000344621	1
-1231	0.000344621	1
-1230	0.000344621	1
-1229	0.000344621	1
-1228	0.000344621	1
-1227	0.000344621	1
-1226	0.000344621	1
-1225	0.000344621	1
-1224	0.000344621	1
-1223	0.000344621	1
-1222	0.000344621	1
-1221	0.000340518	1
-1220	0.000340518	1
-1219	0.000340518	1
-1218	0.000344621	1
-1217	0.000344621	1
-1216	0.000344621	1
-1215	0.000340518	1
-1214	0.000340518	1
-1213	0.000340518	1
-1212	0.000340518	1
-1211	0.000340518	1
-1210	0.000340518	1
-1209	0.000340518	1
-1208	0.000340518	1
-1207	0.000336416	1
-1206	0.000336416	1
-1205	0.000336416	1
-1204	0.000336416	1
-1203	0.000336416	1
-1202	0.000336416	1
-1201	0.000336416	1
-1200	0.000336416	1
-1199	0.000336416	1
-1198	0.000336416	1
-1197	0.000336416	1
-1196	0.000336416	1
-1195	0.000336416	1
-1194	0.000336416	1
-1193	0.000336416	1
-1192	0.000336416	1
-1191	0.000336416	1
-1190	0.000336416	1
-1189	0.000336416	1
-1188	0.000336416	1
-1187	0.000336416	1
-1186	0.000336416	1
-1185	0.000336416	1
-1184	0.000340518	1
-1183	0.000340518	1
-1182	0.000340518	1
-1181	0.000340518	1
-1180	0.000340518	1
-1179	0.000340518	1
-1178	0.000340518	1
-1177	0.000340518	1
-1176	0.000340518	1
-1175	0.000340518	1
-1174	0.000340518	1
-1173	0.000336416	1
-1172	0.000336416	1
-1171	0.000336416	1
-1170	0.000336416	1
-1169	0.000336416	1
-1168	0.000336416	1
-1167	0.000336416	1
-1166	0.000336416	1
-1165	0.000336416	1
-1164	0.000336416	1
-1163	0.000336416	1
-1162	0.000336416	1
-1161	0.000336416	1
-1160	0.000336416	1
-1159	0.000336416	1
-1158	0.000336416	1
-1157	0.000336416	1
-1156	0.000336416	1
-1155	0.000336416	1
-1154	0.000336416	1
-1153	0.000332313	1
-1152	0.000328211	1
-1151	0.000328211	1
-1150	0.000328211	1
-1149	0.000328211	1
-1148	0.000332313	1
-1147	0.000332313	1
-1146	0.000332313	1
-1145	0.000324108	1
-1144	0.000324108	1
-1143	0.000324108	1
-1142	0.000320005	1
-1141	0.000320005	1
-1140	0.000320005	1
-1139	0.000320005	1
-1138	0.000320005	1
-1137	0.000320005	1
-1136	0.000324108	1
-1135	0.000320005	1
-1134	0.000320005	1
-1133	0.000320005	1
-1132	0.000320005	1
-1131	0.000320005	1
-1130	0.000320005	1
-1129	0.000320005	1
-1128	0.000320005	1
-1127	0.000320005	1
-1126	0.000315903	1
-1125	0.000315903	1
-1124	0.000315903	1
-1123	0.000315903	1
-1122	0.0003118	1
-1121	0.0003118	1
-1120	0.000307697	1
-1119	0.000307697	1
-1118	0.000307697	1
-1117	0.000307697	1
-1116	0.000307697	1
-1115	0.000307697	1
-1114	0.000307697	1
-1113	0.000307697	1
-1112	0.000307697	1
-1111	0.0003118	1
-1110	0.0003118	1
-1109	0.0003118	1
-1108	0.0003118	1
-1107	0.000307697	1
-1106	0.000307697	1
-1105	0.000307697	1
-1104	0.000307697	1
-1103	0.000307697	1
-1102	0.000307697	1
-1101	0.000307697	1
-1100	0.000303595	1
-1099	0.000303595	1
-1098	0.000303595	1
-1097	0.000303595	1
-1096	0.000303595	1
-1095	0.000299492	1
-1094	0.000299492	1
-1093	0.000299492	1
-1092	0.000299492	1
-1091	0.000299492	1
-1090	0.000295389	1
-1089	0.000299492	1
-1088	0.000299492	1
-1087	0.000299492	1
-1086	0.000295389	1
-1085	0.000295389	1
-1084	0.000295389	1
-1083	0.000295389	1
-1082	0.000295389	1
-1081	0.000295389	1
-1080	0.000295389	1
-1079	0.000295389	1
-1078	0.000295389	1
-1077	0.000295389	1
-1076	0.000291287	1
-1075	0.000291287	1
-1074	0.000291287	1
-1073	0.000291287	1
-1072	0.000291287	1
-1071	0.000291287	1
-1070	0.000291287	1
-1069	0.000291287	1
-1068	0.000291287	1
-1067	0.000291287	1
-1066	0.000291287	1
-1065	0.000291287	1
-1064	0.000291287	1
-1063	0.000291287	1
-1062	0.000287184	1
-1061	0.000283082	1
-1060	0.000283082	1
-1059	0.000278979	1
-1058	0.000274876	1
-1057	0.000274876	1
-1056	0.000270774	1
-1055	0.000270774	1
-1054	0.000270774	1
-1053	0.000270774	1
-1052	0.000270774	1
-1051	0.000270774	1
-1050	0.000270774	1
-1049	0.000270774	1
-1048	0.000270774	1
-1047	0.000266671	1
-1046	0.000266671	1
-1045	0.000266671	1
-1044	0.000266671	1
-1043	0.000262568	1
-1042	0.000262568	1
-1041	0.000258466	1
-1040	0.000258466	1
-1039	0.000258466	1
-1038	0.000258466	1
-1037	0.000258466	1
-1036	0.000258466	1
-1035	0.000258466	1
-1034	0.000258466	1
-1033	0.000258466	1
-1032	0.000254363	1
-1031	0.000254363	1
-1030	0.000254363	1
-1029	0.000254363	1
-1028	0.000254363	1
-1027	0.000254363	1
-1026	0.000254363	1
-1025	0.000250261	1
-1024	0.000250261	1
-1023	0.000250261	1
-1022	0.000250261	1
-1021	0.000250261	1
-1020	0.000250261	1
-1019	0.000250261	1
-1018	0.000250261	1
-1017	0.000250261	1
-1016	0.000250261	1
-1015	0.000250261	1
-1014	0.000250261	1
-1013	0.000246158	1
-1012	0.000246158	1
-1011	0.000246158	1
-1010	0.000242055	1
-1009	0.000242055	1
-1008	0.000242055	1
-1007	0.000242055	1
-1006	0.000242055	1
-1005	0.000242055	1
-1004	0.000242055	1
-1003	0.000242055	1
-1002	0.000242055	1
-1001	0.000246158	1
-1000	0.000246158	1
-999	0.000246158	1
-998	0.000250261	1
-997	0.000250261	1
-996	0.000250261	1
-995	0.000250261	1
-994	0.000250261	1
-993	0.000250261	1
-992	0.000250261	1
-991	0.000250261	1
-990	0.000250261	1
-989	0.000250261	1
-988	0.000250261	1
-987	0.000250261	1
-986	0.000250261	1
-985	0.000246158	1
-984	0.000246158	1
-983	0.000246158	1
-982	0.000246158	1
-981	0.000246158	1
-980	0.000246158	1
-979	0.000246158	1
-978	0.000246158	1
-977	0.000246158	1
-976	0.000246158	1
-975	0.000246158	1
-974	0.000246158	1
-973	0.000246158	1
-972	0.000242055	1
-971	0.000242055	1
-970	0.000242055	1
-969	0.000242055	1
-968	0.000242055	1
-967	0.000242055	1
-966	0.000242055	1
-965	0.000242055	1
-964	0.000242055	1
-963	0.000242055	1
-962	0.000242055	1
-961	0.000237953	1
-960	0.000237953	1
-959	0.000237953	1
-958	0.000237953	1
-957	0.000237953	1
-956	0.00023385	1
-955	0.00023385	1
-954	0.000237953	1
-953	0.00023385	1
-952	0.00023385	1
-951	0.00023385	1
-950	0.00023385	1
-949	0.00023385	1
-948	0.00023385	1
-947	0.00023385	1
-946	0.00023385	1
-945	0.00023385	1
-944	0.00023385	1
-943	0.00023385	1
-942	0.00023385	1
-941	0.00023385	1
-940	0.000229747	1
-939	0.000225645	1
-938	0.000225645	1
-937	0.000225645	1
-936	0.000225645	1
-935	0.000225645	1
-934	0.000229747	1
-933	0.000229747	1
-932	0.000229747	1
-931	0.000225645	1
-930	0.000221542	1
-929	0.000221542	1
-928	0.000221542	1
-927	0.000221542	1
-926	0.000217439	1
-925	0.000217439	1
-924	0.000217439	1
-923	0.000213337	1
-922	0.000213337	1
-921	0.000209234	1
-920	0.000209234	1
-919	0.000209234	1
-918	0.000209234	1
-917	0.000209234	1
-916	0.000209234	1
-915	0.000209234	1
-914	0.000205132	1
-913	0.000201029	1
-912	0.000201029	1
-911	0.000201029	1
-910	0.000201029	1
-909	0.000205132	1
-908	0.000201029	1
-907	0.000196926	1
-906	0.000196926	1
-905	0.000196926	1
-904	0.000196926	1
-903	0.000196926	1
-902	0.000201029	1
-901	0.000196926	1
-900	0.000196926	1
-899	0.000196926	1
-898	0.000201029	1
-897	0.000196926	1
-896	0.000192824	1
-895	0.000192824	1
-894	0.000188721	1
-893	0.000188721	1
-892	0.000188721	1
-891	0.000188721	1
-890	0.000184618	1
-889	0.000180516	1
-888	0.000180516	1
-887	0.000180516	1
-886	0.000176413	1
-885	0.000176413	1
-884	0.000176413	1
-883	0.000172311	1
-882	0.000172311	1
-881	0.000172311	1
-880	0.000168208	1
-879	0.000168208	1
-878	0.000168208	1
-877	0.000168208	1
-876	0.000168208	1
-875	0.000168208	1
-874	0.000168208	1
-873	0.000168208	1
-872	0.000168208	1
-871	0.000168208	1
-870	0.000168208	1
-869	0.000168208	1
-868	0.000168208	1
-867	0.000168208	1
-866	0.000168208	1
-865	0.000168208	1
-864	0.000168208	1
-863	0.000168208	1
-862	0.000168208	1
-861	0.000168208	1
-860	0.000168208	1
-859	0.000168208	1
-858	0.000168208	1
-857	0.000168208	1
-856	0.000168208	1
-855	0.000168208	1
-854	0.000168208	1
-853	0.000168208	1
-852	0.000168208	1
-851	0.000168208	1
-850	0.000168208	1
-849	0.000168208	1
-848	0.000168208	1
-847	0.000168208	1
-846	0.000164105	1
-845	0.000168208	1
-844	0.000168208	1
-843	0.000168208	1
-842	0.000168208	1
-841	0.000168208	1
-840	0.000168208	1
-839	0.000168208	1
-838	0.000168208	1
-837	0.000168208	1
-836	0.000168208	1
-835	0.000168208	1
-834	0.000168208	1
-833	0.000168208	1
-832	0.000168208	1
-831	0.000168208	1
-830	0.000168208	1
-829	0.000168208	1
-828	0.000168208	1
-827	0.000168208	1
-826	0.000168208	1
-825	0.000168208	1
-824	0.000168208	1
-823	0.000168208	1
-822	0.000168208	1
-821	0.000168208	1
-820	0.000168208	1
-819	0.000164105	1
-818	0.000164105	1
-817	0.000164105	1
-816	0.000164105	1
-815	0.000164105	1
-814	0.000164105	1
-813	0.000168208	1
-812	0.000168208	1
-811	0.000164105	1
-810	0.000164105	1
-809	0.000164105	1
-808	0.000164105	1
-807	0.000160003	1
-806	0.000160003	1
-805	0.000160003	1
-804	0.000160003	1
-803	0.000160003	1
-802	0.000160003	1
-801	0.000160003	1
-800	0.0001559	1
-799	0.0001559	1
-798	0.000151797	1
-797	0.000151797	1
-796	0.000151797	1
-795	0.000151797	1
-794	0.000151797	1
-793	0.000151797	1
-792	0.000151797	1
-791	0.000151797	1
-790	0.000151797	1
-789	0.000151797	1
-788	0.000151797	1
-787	0.000151797	1
-786	0.000151797	1
-785	0.000151797	1
-784	0.000151797	1
-783	0.000151797	1
-782	0.000151797	1
-781	0.000151797	1
-780	0.000151797	1
-779	0.000151797	1
-778	0.000151797	1
-777	0.000147695	1
-776	0.000147695	1
-775	0.000147695	1
-774	0.000147695	1
-773	0.000147695	1
-772	0.000147695	1
-771	0.000143592	1
-770	0.000143592	1
-769	0.000143592	1
-768	0.000143592	1
-767	0.000143592	1
-766	0.000143592	1
-765	0.000143592	1
-764	0.000143592	1
-763	0.000143592	1
-762	0.000143592	1
-761	0.000143592	1
-760	0.000143592	1
-759	0.000143592	1
-758	0.000143592	1
-757	0.000143592	1
-756	0.000143592	1
-755	0.000143592	1
-754	0.000143592	1
-753	0.000143592	1
-752	0.000143592	1
-751	0.000143592	1
-750	0.000139489	1
-749	0.000139489	1
-748	0.000139489	1
-747	0.000139489	1
-746	0.000139489	1
-745	0.000139489	1
-744	0.000139489	1
-743	0.000139489	1
-742	0.000139489	1
-741	0.000139489	1
-740	0.000139489	1
-739	0.000139489	1
-738	0.000139489	1
-737	0.000139489	1
-736	0.000139489	1
-735	0.000139489	1
-734	0.000139489	1
-733	0.000139489	1
-732	0.000139489	1
-731	0.000139489	1
-730	0.000139489	1
-729	0.000139489	1
-728	0.000139489	1
-727	0.000139489	1
-726	0.000135387	1
-725	0.000135387	1
-724	0.000135387	1
-723	0.000135387	1
-722	0.000135387	1
-721	0.000135387	1
-720	0.000131284	1
-719	0.000131284	1
-718	0.000131284	1
-717	0.000131284	1
-716	0.000131284	1
-715	0.000131284	1
-714	0.000131284	1
-713	0.000131284	1
-712	0.000127182	1
-711	0.000127182	1
-710	0.000127182	1
-709	0.000127182	1
-708	0.000127182	1
-707	0.000127182	1
-706	0.000127182	1
-705	0.000127182	1
-704	0.000127182	1
-703	0.000127182	1
-702	0.000127182	1
-701	0.000127182	1
-700	0.000127182	1
-699	0.000127182	1
-698	0.000127182	1
-697	0.000127182	1
-696	0.000127182	1
-695	0.000127182	1
-694	0.000127182	1
-693	0.000127182	1
-692	0.000127182	1
-691	0.000127182	1
-690	0.000127182	1
-689	0.000127182	1
-688	0.000127182	1
-687	0.000127182	1
-686	0.000127182	1
-685	0.000127182	1
-684	0.000127182	1
-683	0.000127182	1
-682	0.000127182	1
-681	0.000127182	1
-680	0.000127182	1
-679	0.000127182	1
-678	0.000131284	1
-677	0.000131284	1
-676	0.000131284	1
-675	0.000131284	1
-674	0.000131284	1
-673	0.000131284	1
-672	0.000131284	1
-671	0.000131284	1
-670	0.000131284	1
-669	0.000131284	1
-668	0.000131284	1
-667	0.000131284	1
-666	0.000131284	1
-665	0.000131284	1
-664	0.000131284	1
-663	0.000131284	1
-662	0.000131284	1
-661	0.000131284	1
-660	0.000131284	1
-659	0.000127182	1
-658	0.000127182	1
-657	0.000127182	1
-656	0.000127182	1
-655	0.000127182	1
-654	0.000127182	1
-653	0.000127182	1
-652	0.000127182	1
-651	0.000127182	1
-650	0.000127182	1
-649	0.000127182	1
-648	0.000127182	1
-647	0.000127182	1
-646	0.000127182	1
-645	0.000127182	1
-644	0.000123079	1
-643	0.000123079	1
-642	0.000123079	1
-641	0.000123079	1
-640	0.000123079	1
-639	0.000118976	1
-638	0.000118976	1
-637	0.000118976	1
-636	0.000118976	1
-635	0.000118976	1
-634	0.000118976	1
-633	0.000118976	1
-632	0.000118976	1
-631	0.000118976	1
-630	0.000118976	1
-629	0.000118976	1
-628	0.000118976	1
-627	0.000118976	1
-626	0.000114874	1
-625	0.000114874	1
-624	0.000114874	1
-623	0.000114874	1
-622	0.000114874	1
-621	0.000114874	1
-620	0.000114874	1
-619	0.000114874	1
-618	0.000114874	1
-617	0.000114874	1
-616	0.000114874	1
-615	0.000114874	1
-614	0.000114874	1
-613	0.000114874	1
-612	0.000114874	1
-611	0.000114874	1
-610	0.000114874	1
-609	0.000114874	1
-608	0.000114874	1
-607	0.000114874	1
-606	0.000114874	1
-605	0.000114874	1
-604	0.000114874	1
-603	0.000114874	1
-602	0.000114874	1
-601	0.000114874	1
-600	0.000114874	1
-599	0.000114874	1
-598	0.000114874	1
-597	0.000114874	1
-596	0.000110771	1
-595	0.000110771	1
-594	0.000110771	1
-593	0.000110771	1
-592	0.000110771	1
-591	0.000110771	1
-590	0.000106668	1
-589	0.000106668	1
-588	0.000106668	1
-587	0.000106668	1
-586	0.000106668	1
-585	0.000106668	1
-584	0.000106668	1
-583	0.000106668	1
-582	0.000106668	1
-581	0.000106668	1
-580	0.000106668	1
-579	0.000106668	1
-578	0.000102566	1
-577	0.000102566	1
-576	0.000102566	1
-575	0.000102566	1
-574	0.000102566	1
-573	0.000102566	1
-572	0.000106668	1
-571	0.000106668	1
-570	0.000106668	1
-569	0.000106668	1
-568	0.000106668	1
-567	0.000106668	1
-566	0.000106668	1
-565	0.000106668	1
-564	0.000106668	1
-563	0.000110771	1
-562	0.000106668	1
-561	0.000106668	1
-560	0.000106668	1
-559	0.000106668	1
-558	0.000106668	1
-557	0.000106668	1
-556	0.000106668	1
-555	0.000106668	1
-554	0.000106668	1
-553	0.000102566	1
-552	0.000102566	1
-551	0.000102566	1
-550	0.000102566	1
-549	0.000102566	1
-548	0.000102566	1
-547	0.000102566	1
-546	9.84632e-05	1
-545	9.84632e-05	1
-544	9.84632e-05	1
-543	9.84632e-05	1
-542	9.84632e-05	1
-541	9.43605e-05	1
-540	9.43605e-05	1
-539	9.43605e-05	1
-538	9.43605e-05	1
-537	9.43605e-05	1
-536	9.43605e-05	1
-535	9.43605e-05	1
-534	9.43605e-05	1
-533	9.43605e-05	1
-532	9.43605e-05	1
-531	9.43605e-05	1
-530	9.43605e-05	1
-529	9.43605e-05	1
-528	9.43605e-05	1
-527	9.43605e-05	1
-526	9.43605e-05	1
-525	9.43605e-05	1
-524	9.43605e-05	1
-523	9.43605e-05	1
-522	9.43605e-05	1
-521	9.43605e-05	1
-520	9.43605e-05	1
-519	9.43605e-05	1
-518	9.43605e-05	1
-517	9.43605e-05	1
-516	9.43605e-05	1
-515	9.43605e-05	1
-514	9.43605e-05	1
-513	9.43605e-05	1
-512	9.43605e-05	1
-511	9.43605e-05	1
-510	9.43605e-05	1
-509	9.43605e-05	1
-508	9.43605e-05	1
-507	9.43605e-05	1
-506	9.43605e-05	1
-505	9.43605e-05	1
-504	9.43605e-05	1
-503	9.43605e-05	1
-502	9.43605e-05	1
[truncated: 48,011 more rows]

## Sheet: Fig_4B_Supp_Fig_4_samples
gene_ID	probability	mean	sample
DDB_G0267378	1	4.66454	real_variable_gene
DDB_G0267432	1	218.013	real_variable_gene
DDB_G0267470	1	60.6505	real_variable_gene
DDB_G0267474	1	47.9278	real_variable_gene
DDB_G0267476	1	56.1328	real_variable_gene
DDB_G0267496	1	145.162	real_variable_gene
DDB_G0267564	1	23.9653	real_variable_gene
DDB_G0267616	1	29.4727	real_variable_gene
DDB_G0267638	1	127.401	real_variable_gene
DDB_G0267656	1	19.6185	real_variable_gene
DDB_G0267666	1	13.8058	real_variable_gene
DDB_G0267674	1	120.743	real_variable_gene
DDB_G0267682	1	13.005	real_variable_gene
DDB_G0267684	1	25.1823	real_variable_gene
DDB_G0267692	1	41.846	real_variable_gene
DDB_G0267710	1	6.98008	real_variable_gene
DDB_G0267720	1	17.4343	real_variable_gene
DDB_G0267746	1	3.57041	real_variable_gene
DDB_G0267760	1	75.9373	real_variable_gene
DDB_G0267814	1	88.8289	real_variable_gene
DDB_G0267834	1	2.25077	real_variable_gene
DDB_G0267842	1	7.61875	real_variable_gene
DDB_G0267854	1	51.1883	real_variable_gene
DDB_G0267856	1	2.6844	real_variable_gene
DDB_G0267958	1	8.22059	real_variable_gene
DDB_G0268000	1	301.914	real_variable_gene
DDB_G0268004	1	90.7336	real_variable_gene
DDB_G0268066	1	24.2506	real_variable_gene
DDB_G0268108	1	20.3827	real_variable_gene
DDB_G0268130	1	43.4098	real_variable_gene
DDB_G0268132	1	51.0326	real_variable_gene
DDB_G0268148	1	15.6868	real_variable_gene
DDB_G0268162	1	31.1431	real_variable_gene
DDB_G0268190	1	8.46934	real_variable_gene
DDB_G0268196	1	11.5441	real_variable_gene
DDB_G0268208	1	7.04355	real_variable_gene
DDB_G0268258	1	7.45017	real_variable_gene
DDB_G0268286	1	38.5724	real_variable_gene
DDB_G0268318	1	0.78994	real_variable_gene
DDB_G0268332	1	59.5266	real_variable_gene
DDB_G0268344	1	21.8978	real_variable_gene
DDB_G0268352	1	4.40812	real_variable_gene
DDB_G0268374	1	11.7444	real_variable_gene
DDB_G0268410	1	22.311	real_variable_gene
DDB_G0268430	1	29.7504	real_variable_gene
DDB_G0268446	1	23.5079	real_variable_gene
DDB_G0268462	1	13.2212	real_variable_gene
DDB_G0268504	1	31.7513	real_variable_gene
DDB_G0268592	1	115.101	real_variable_gene
DDB_G0268644	1	12.484	real_variable_gene
DDB_G0268678	1	19.3761	real_variable_gene
DDB_G0268680	1	10.564	real_variable_gene
DDB_G0268706	1	36.7969	real_variable_gene
DDB_G0268710	1	3.01513	real_variable_gene
DDB_G0268754	1	11.4943	real_variable_gene
DDB_G0268776	1	43.8818	real_variable_gene
DDB_G0268844	1	5.36862	real_variable_gene
DDB_G0268846	1	24.2768	real_variable_gene
DDB_G0268848	1	38.2179	real_variable_gene
DDB_G0268850	1	23.1078	real_variable_gene
DDB_G0268852	1	13.7109	real_variable_gene
DDB_G0268874	1	16.236	real_variable_gene
DDB_G0268886	1	230.16	real_variable_gene
DDB_G0268892	1	115.303	real_variable_gene
DDB_G0269012	1	4.5946	real_variable_gene
DDB_G0269040	1	127.733	real_variable_gene
DDB_G0269054	1	58.3168	real_variable_gene
DDB_G0269060	1	70.8298	real_variable_gene
DDB_G0269072	1	11.706	real_variable_gene
DDB_G0269074	1	16.1064	real_variable_gene
DDB_G0269106	1	802.098	real_variable_gene
DDB_G0269232	1	74.6859	real_variable_gene
DDB_G0269254	1	29.1169	real_variable_gene
DDB_G0269272	1	16.8074	real_variable_gene
DDB_G0269388	1	608.709	real_variable_gene
DDB_G0269430	1	62.5164	real_variable_gene
DDB_G0269432	1	18.0145	real_variable_gene
DDB_G0269466	1	29.4628	real_variable_gene
DDB_G0269482	1	5.38759	real_variable_gene
DDB_G0269486	1	5.6153	real_variable_gene
DDB_G0269502	1	29.3837	real_variable_gene
DDB_G0269534	1	26.9894	real_variable_gene
DDB_G0269536	1	5.02509	real_variable_gene
DDB_G0269554	1	13.8494	real_variable_gene
DDB_G0269584	1	40.403	real_variable_gene
DDB_G0269618	1	16.2449	real_variable_gene
DDB_G0269696	1	10.4888	real_variable_gene
DDB_G0269732	1	91.5014	real_variable_gene
DDB_G0269850	1	767.072	real_variable_gene
DDB_G0269880	1	23.6586	real_variable_gene
DDB_G0269886	1	211.618	real_variable_gene
DDB_G0269902	1	1.8746	real_variable_gene
DDB_G0269978	1	1.40563	real_variable_gene
DDB_G0270058	1	20.1401	real_variable_gene
DDB_G0270060	1	35.626	real_variable_gene
DDB_G0270100	1	2.25119	real_variable_gene
DDB_G0270110	1	59.5616	real_variable_gene
DDB_G0270162	1	22.3498	real_variable_gene
DDB_G0270228	1	5.32143	real_variable_gene
DDB_G0270278	1	15.9183	real_variable_gene
DDB_G0270284	1	27.2655	real_variable_gene
DDB_G0270296	1	47.5339	real_variable_gene
DDB_G0270318	1	12.9345	real_variable_gene
DDB_G0270330	1	17.5442	real_variable_gene
DDB_G0270354	1	8.42401	real_variable_gene
DDB_G0270368	1	41.9283	real_variable_gene
DDB_G0270392	1	26.9965	real_variable_gene
DDB_G0270518	1	19.7482	real_variable_gene
DDB_G0270540	1	3.76602	real_variable_gene
DDB_G0270544	1	21.2538	real_variable_gene
DDB_G0270550	1	13.3499	real_variable_gene
DDB_G0270554	1	12.5523	real_variable_gene
DDB_G0270572	1	6.32955	real_variable_gene
DDB_G0270606	1	14.8114	real_variable_gene
DDB_G0270626	1	106.089	real_variable_gene
DDB_G0270636	1	15.0837	real_variable_gene
DDB_G0270652	1	42.0215	real_variable_gene
DDB_G0270678	1	3.02969	real_variable_gene
DDB_G0270700	1	25.3491	real_variable_gene
DDB_G0270726	1	2.42956	real_variable_gene
DDB_G0270754	1	40.2251	real_variable_gene
DDB_G0270764	1	24.779	real_variable_gene
DDB_G0270826	1	38.7842	real_variable_gene
DDB_G0270836	1	221.328	real_variable_gene
DDB_G0270932	1	42.0623	real_variable_gene
DDB_G0270938	1	28.7243	real_variable_gene
DDB_G0270962	1	71.2406	real_variable_gene
DDB_G0270964	1	193.755	real_variable_gene
DDB_G0270966	1	84.6584	real_variable_gene
DDB_G0270990	1	272.228	real_variable_gene
DDB_G0271022	1	67.6503	real_variable_gene
DDB_G0271024	1	137.54	real_variable_gene
DDB_G0271042	1	26.5511	real_variable_gene
DDB_G0271078	1	21.6797	real_variable_gene
DDB_G0271140	1	65.9374	real_variable_gene
DDB_G0271232	1	46.2795	real_variable_gene
DDB_G0271234	1	3.09243	real_variable_gene
DDB_G0271238	1	8.01515	real_variable_gene
DDB_G0271314	1	1.35433	real_variable_gene
DDB_G0271372	1	3.09769	real_variable_gene
DDB_G0271524	1	5.77462	real_variable_gene
DDB_G0271576	1	2.27353	real_variable_gene
DDB_G0271628	1	12.0118	real_variable_gene
DDB_G0271638	1	4.21127	real_variable_gene
DDB_G0271672	1	13.3255	real_variable_gene
DDB_G0271680	1	20.7951	real_variable_gene
DDB_G0271722	1	91.7205	real_variable_gene
DDB_G0271734	1	23.4781	real_variable_gene
DDB_G0271738	1	11.8284	real_variable_gene
DDB_G0271740	1	18.9718	real_variable_gene
DDB_G0271750	1	13.5821	real_variable_gene
DDB_G0271752	1	645.876	real_variable_gene
DDB_G0271778	1	2.39794	real_variable_gene
DDB_G0271780	1	8.91432	real_variable_gene
DDB_G0271788	1	34.2233	real_variable_gene
DDB_G0271802	1	6.34602	real_variable_gene
DDB_G0271806	1	56.7053	real_variable_gene
DDB_G0271808	1	1.59996	real_variable_gene
DDB_G0271868	1	44.8222	real_variable_gene
DDB_G0271870	1	4.98351	real_variable_gene
DDB_G0271916	1	215.668	real_variable_gene
DDB_G0271946	1	53.7891	real_variable_gene
DDB_G0271970	1	140.455	real_variable_gene
DDB_G0272032	1	108.471	real_variable_gene
DDB_G0272052	1	24.8162	real_variable_gene
DDB_G0272192	1	7.42803	real_variable_gene
DDB_G0272206	1	29.6621	real_variable_gene
DDB_G0272214	1	5.46965	real_variable_gene
DDB_G0272218	1	40.2853	real_variable_gene
DDB_G0272220	1	10.7165	real_variable_gene
DDB_G0272240	1	32.9077	real_variable_gene
DDB_G0272280	1	137.769	real_variable_gene
DDB_G0272282	1	37.5806	real_variable_gene
DDB_G0272294	1	1.82096	real_variable_gene
DDB_G0272330	1	32.9149	real_variable_gene
DDB_G0272334	1	4.39934	real_variable_gene
DDB_G0272336	1	10.5684	real_variable_gene
DDB_G0272364	1	5.16183	real_variable_gene
DDB_G0272374	1	143.482	real_variable_gene
DDB_G0272408	1	1.17193	real_variable_gene
DDB_G0272452	1	6.79661	real_variable_gene
DDB_G0272494	1	14.8778	real_variable_gene
DDB_G0272510	1	19.8523	real_variable_gene
DDB_G0272530	1	33.4452	real_variable_gene
DDB_G0272532	1	13.38	real_variable_gene
DDB_G0272765	1	59.1345	real_variable_gene
DDB_G0272777	1	12.0997	real_variable_gene
DDB_G0272783	1	31.6522	real_variable_gene
DDB_G0272813	1	66.9378	real_variable_gene
DDB_G0272987	1	13.8731	real_variable_gene
DDB_G0272995	1	44.3553	real_variable_gene
DDB_G0273017	1	1.66692	real_variable_gene
DDB_G0273519	1	133.887	real_variable_gene
DDB_G0273527	1	12.8492	real_variable_gene
DDB_G0273561	1	9.69786	real_variable_gene
DDB_G0273577	1	49.446	real_variable_gene
DDB_G0273601	1	8.68771	real_variable_gene
DDB_G0273605	1	335.751	real_variable_gene
DDB_G0273641	1	28.4923	real_variable_gene
DDB_G0273651	1	2547.79	real_variable_gene
DDB_G0273675	1	4.24762	real_variable_gene
DDB_G0273733	1	12.9062	real_variable_gene
DDB_G0273753	1	123.929	real_variable_gene
DDB_G0273785	1	372.259	real_variable_gene
DDB_G0273801	1	19.8101	real_variable_gene
DDB_G0273823	1	1.92111	real_variable_gene
DDB_G0273829	1	265.031	real_variable_gene
DDB_G0273843	1	11.496	real_variable_gene
DDB_G0273851	1	28.0877	real_variable_gene
DDB_G0273885	1	1494.11	real_variable_gene
DDB_G0273887	1	998.536	real_variable_gene
DDB_G0273901	1	9.27943	real_variable_gene
DDB_G0273919	1	177.894	real_variable_gene
DDB_G0273921	1	248.918	real_variable_gene
DDB_G0274035	1	13.4168	real_variable_gene
DDB_G0274051	1	101.987	real_variable_gene
DDB_G0274053	1	7.95354	real_variable_gene
DDB_G0274077	1	96.5763	real_variable_gene
DDB_G0274101	1	40.3047	real_variable_gene
DDB_G0274115	1	89.397	real_variable_gene
DDB_G0274117	1	32.7319	real_variable_gene
DDB_G0274131	1	172.31	real_variable_gene
DDB_G0274135	1	286.082	real_variable_gene
DDB_G0274149	1	12.4254	real_variable_gene
DDB_G0274151	1	2.97253	real_variable_gene
DDB_G0274161	1	8.61394	real_variable_gene
DDB_G0274177	1	56.5002	real_variable_gene
DDB_G0274199	1	12.3583	real_variable_gene
DDB_G0274215	1	201.323	real_variable_gene
DDB_G0274221	1	12.5119	real_variable_gene
DDB_G0274247	1	20.0981	real_variable_gene
DDB_G0274255	1	11.1203	real_variable_gene
DDB_G0274263	1	36.6179	real_variable_gene
DDB_G0274373	1	11.9274	real_variable_gene
DDB_G0274383	1	19.3042	real_variable_gene
DDB_G0274385	1	46.5226	real_variable_gene
DDB_G0274399	1	254.936	real_variable_gene
DDB_G0274423	1	152.112	real_variable_gene
DDB_G0274441	1	55.6958	real_variable_gene
DDB_G0274473	1	18.044	real_variable_gene
DDB_G0274525	1	15.8563	real_variable_gene
DDB_G0274555	1	12.8594	real_variable_gene
DDB_G0274569	1	3.09392	real_variable_gene
DDB_G0274575	1	79.8938	real_variable_gene
DDB_G0274585	1	66.6593	real_variable_gene
DDB_G0274587	1	100.269	real_variable_gene
DDB_G0274607	1	28.5646	real_variable_gene
DDB_G0274617	1	2.03163	real_variable_gene
DDB_G0274649	1	3.53351	real_variable_gene
DDB_G0274713	1	18.5434	real_variable_gene
DDB_G0274735	1	15.8168	real_variable_gene
DDB_G0274773	1	70.1016	real_variable_gene
DDB_G0274789	1	59.7971	real_variable_gene
DDB_G0274841	1	6.68432	real_variable_gene
DDB_G0274923	1	9.03751	real_variable_gene
DDB_G0274925	1	5.34921	real_variable_gene
DDB_G0274931	1	3.00599	real_variable_gene
DDB_G0274939	1	64.9136	real_variable_gene
DDB_G0274971	1	28.4597	real_variable_gene
DDB_G0275009	1	17.1157	real_variable_gene
DDB_G0275011	1	7.10169	real_variable_gene
DDB_G0275023	1	834.401	real_variable_gene
DDB_G0275085	1	4.77917	real_variable_gene
DDB_G0275097	1	83.4822	real_variable_gene
DDB_G0275111	1	298.277	real_variable_gene
DDB_G0275239	1	179.87	real_variable_gene
DDB_G0275245	1	1.29041	real_variable_gene
DDB_G0275253	1	20.3535	real_variable_gene
DDB_G0275269	1	3.40988	real_variable_gene
DDB_G0275317	1	1.82295	real_variable_gene
DDB_G0275323	1	163.882	real_variable_gene
DDB_G0275341	1	180.095	real_variable_gene
DDB_G0275401	1	24.7142	real_variable_gene
DDB_G0275421	1	1.00577	real_variable_gene
DDB_G0275447	1	463.43	real_variable_gene
DDB_G0275457	1	8.61783	real_variable_gene
DDB_G0275475	1	19.2306	real_variable_gene
DDB_G0275497	1	15.0021	real_variable_gene
DDB_G0275535	1	4.21748	real_variable_gene
DDB_G0275559	1	178.428	real_variable_gene
DDB_G0275561	1	12.4623	real_variable_gene
DDB_G0275571	1	11.8676	real_variable_gene
DDB_G0275613	1	20.7773	real_variable_gene
DDB_G0275625	1	570.83	real_variable_gene
DDB_G0275631	1	71.1092	real_variable_gene
DDB_G0275633	1	192.053	real_variable_gene
DDB_G0275635	1	42.596	real_variable_gene
DDB_G0275655	1	117.304	real_variable_gene
DDB_G0275659	1	32.4402	real_variable_gene
DDB_G0275733	1	18.4202	real_variable_gene
DDB_G0275777	1	19.7051	real_variable_gene
DDB_G0275789	1	1.56355	real_variable_gene
DDB_G0275807	1	2.31189	real_variable_gene
DDB_G0275815	1	25.5073	real_variable_gene
DDB_G0275867	1	26.8388	real_variable_gene
DDB_G0275879	1	8.90376	real_variable_gene
DDB_G0275889	1	6.0073	real_variable_gene
DDB_G0275929	1	4.0926	real_variable_gene
DDB_G0275971	1	346.016	real_variable_gene
DDB_G0276003	1	18.9234	real_variable_gene
DDB_G0276037	1	20.4201	real_variable_gene
DDB_G0276083	1	139.139	real_variable_gene
DDB_G0276087	1	118.466	real_variable_gene
DDB_G0276103	1	257.039	real_variable_gene
DDB_G0276119	1	57.3266	real_variable_gene
DDB_G0276145	1	13.4755	real_variable_gene
DDB_G0276207	1	3.37419	real_variable_gene
DDB_G0276215	1	31.2549	real_variable_gene
DDB_G0276219	1	6.24088	real_variable_gene
DDB_G0276229	1	25.6367	real_variable_gene
DDB_G0276277	1	32.2959	real_variable_gene
DDB_G0276285	1	18.3737	real_variable_gene
DDB_G0276309	1	72.8252	real_variable_gene
DDB_G0276337	1	11.0321	real_variable_gene
DDB_G0276351	1	17.4178	real_variable_gene
DDB_G0276363	1	94.762	real_variable_gene
DDB_G0276367	1	8.4481	real_variable_gene
DDB_G0276369	1	8.38527	real_variable_gene
DDB_G0276389	1	9.5268	real_variable_gene
DDB_G0276395	1	19.348	real_variable_gene
DDB_G0276403	1	1.67493	real_variable_gene
DDB_G0276479	1	10.7242	real_variable_gene
DDB_G0276481	1	243.69	real_variable_gene
DDB_G0276607	1	10.5238	real_variable_gene
DDB_G0276633	1	139.689	real_variable_gene
DDB_G0276661	1	90.5109	real_variable_gene
DDB_G0276677	1	33.6391	real_variable_gene
DDB_G0276695	1	49.379	real_variable_gene
DDB_G0276729	1	17.3787	real_variable_gene
DDB_G0276731	1	19.5903	real_variable_gene
DDB_G0276745	1	10.0669	real_variable_gene
DDB_G0276747	1	533.42	real_variable_gene
DDB_G0276761	1	47.3834	real_variable_gene
DDB_G0276811	1	35.8592	real_variable_gene
DDB_G0276855	1	67.3556	real_variable_gene
DDB_G0276863	1	133.922	real_variable_gene
DDB_G0276869	1	28.9074	real_variable_gene
DDB_G0276887	1	50.119	real_variable_gene
DDB_G0276919	1	6.26001	real_variable_gene
DDB_G0276937	1	11.924	real_variable_gene
DDB_G0276941	1	9.4889	real_variable_gene
DDB_G0276949	1	15.7432	real_variable_gene
DDB_G0276951	1	78.0662	real_variable_gene
DDB_G0276953	1	32.4811	real_variable_gene
DDB_G0276981	1	10.0327	real_variable_gene
DDB_G0277005	1	104.275	real_variable_gene
DDB_G0277051	1	98.676	real_variable_gene
DDB_G0277103	1	6.03612	real_variable_gene
DDB_G0277119	1	26.512	real_variable_gene
DDB_G0277125	1	5.59284	real_variable_gene
DDB_G0277185	1	63.8613	real_variable_gene
DDB_G0277199	1	209.167	real_variable_gene
DDB_G0277203	1	356.686	real_variable_gene
DDB_G0277245	1	123.918	real_variable_gene
DDB_G0277269	1	182.852	real_variable_gene
DDB_G0277291	1	6.08884	real_variable_gene
DDB_G0277309	1	7.35867	real_variable_gene
DDB_G0277341	1	24.7187	real_variable_gene
DDB_G0277391	1	280.01	real_variable_gene
DDB_G0277397	1	3.73313	real_variable_gene
DDB_G0277413	1	30.6371	real_variable_gene
DDB_G0277425	1	8.33078	real_variable_gene
DDB_G0277427	1	23.8325	real_variable_gene
DDB_G0277475	1	10.767	real_variable_gene
DDB_G0277489	1	2.55835	real_variable_gene
DDB_G0277497	1	55.0455	real_variable_gene
DDB_G0277627	1	9.72011	real_variable_gene
DDB_G0277695	1	5.12287	real_variable_gene
DDB_G0277731	1	27.7459	real_variable_gene
DDB_G0277737	1	104.108	real_variable_gene
DDB_G0277749	1	3.04889	real_variable_gene
DDB_G0277757	1	102.079	real_variable_gene
DDB_G0277769	1	5.37303	real_variable_gene
DDB_G0277777	1	26.9244	real_variable_gene
DDB_G0277797	1	291.526	real_variable_gene
DDB_G0277813	1	4.51815	real_variable_gene
DDB_G0277831	1	25.2591	real_variable_gene
DDB_G0277841	1	135.23	real_variable_gene
DDB_G0277853	1	10.0754	real_variable_gene
DDB_G0277857	1	48.2705	real_variable_gene
DDB_G0277861	1	135.933	real_variable_gene
DDB_G0277863	1	7.35018	real_variable_gene
DDB_G0277915	1	22.1965	real_variable_gene
DDB_G0277933	1	2.44432	real_variable_gene
DDB_G0277941	1	15.9644	real_variable_gene
DDB_G0277959	1	27.7727	real_variable_gene
DDB_G0277969	1	23.2399	real_variable_gene
DDB_G0278069	1	3.96497	real_variable_gene
DDB_G0278161	1	86.3559	real_variable_gene
DDB_G0278171	1	3.16495	real_variable_gene
DDB_G0278177	1	48.7347	real_variable_gene
DDB_G0278189	1	3.69323	real_variable_gene
DDB_G0278193	1	61.3987	real_variable_gene
DDB_G0278215	1	5.69829	real_variable_gene
DDB_G0278259	1	55.7324	real_variable_gene
DDB_G0278261	1	30.148	real_variable_gene
DDB_G0278289	1	14.2642	real_variable_gene
DDB_G0278321	1	71.7986	real_variable_gene
DDB_G0278339	1	76.1555	real_variable_gene
DDB_G0278393	1	13.0678	real_variable_gene
DDB_G0278417	1	34.2888	real_variable_gene
DDB_G0278419	1	5.94637	real_variable_gene
DDB_G0278423	1	2.66523	real_variable_gene
DDB_G0278463	1	29.6451	real_variable_gene
DDB_G0278469	1	38.4491	real_variable_gene
DDB_G0278481	1	789.114	real_variable_gene
DDB_G0278501	1	2.7822	real_variable_gene
DDB_G0278519	1	41.4996	real_variable_gene
DDB_G0278587	1	5.70326	real_variable_gene
DDB_G0278591	1	26.0486	real_variable_gene
DDB_G0278609	1	20.7385	real_variable_gene
DDB_G0278655	1	28.5213	real_variable_gene
DDB_G0278667	1	103.095	real_variable_gene
DDB_G0278699	1	107.281	real_variable_gene
DDB_G0278701	1	17.7963	real_variable_gene
DDB_G0278761	1	1068.36	real_variable_gene
DDB_G0278785	1	81.4189	real_variable_gene
DDB_G0278825	1	37.4252	real_variable_gene
DDB_G0278903	1	88.1251	real_variable_gene
DDB_G0278923	1	30.6848	real_variable_gene
DDB_G0278933	1	21.5062	real_variable_gene
DDB_G0278937	1	15.596	real_variable_gene
DDB_G0279009	1	49.0259	real_variable_gene
DDB_G0279015	1	125.227	real_variable_gene
DDB_G0279023	1	111.91	real_variable_gene
DDB_G0279115	1	50.9049	real_variable_gene
DDB_G0279179	1	802.706	real_variable_gene
DDB_G0279181	1	32.9677	real_variable_gene
DDB_G0279219	1	11.7233	real_variable_gene
DDB_G0279259	1	8.01019	real_variable_gene
DDB_G0279307	1	22.1174	real_variable_gene
DDB_G0279313	1	290.099	real_variable_gene
DDB_G0279325	1	31.4606	real_variable_gene
DDB_G0279335	1	3.42992	real_variable_gene
DDB_G0279353	1	23.8507	real_variable_gene
DDB_G0279355	1	20.4644	real_variable_gene
DDB_G0279361	1	5.185	real_variable_gene
DDB_G0279373	1	33.053	real_variable_gene
DDB_G0279417	1	58.9693	real_variable_gene
DDB_G0279483	1	87.915	real_variable_gene
DDB_G0279493	1	4.4499	real_variable_gene
DDB_G0279503	1	45.9245	real_variable_gene
DDB_G0279507	1	36.3548	real_variable_gene
DDB_G0279525	1	3.52127	real_variable_gene
DDB_G0279535	1	21.9976	real_variable_gene
DDB_G0279541	1	5.95726	real_variable_gene
DDB_G0279669	1	9.32073	real_variable_gene
DDB_G0279683	1	7.44596	real_variable_gene
DDB_G0279699	1	55.4895	real_variable_gene
DDB_G0279751	1	113.598	real_variable_gene
DDB_G0279755	1	329.495	real_variable_gene
DDB_G0279795	1	302.291	real_variable_gene
DDB_G0279931	1	1.24203	real_variable_gene
DDB_G0279935	1	11.7632	real_variable_gene
DDB_G0279955	1	6.59274	real_variable_gene
DDB_G0279959	1	120.81	real_variable_gene
DDB_G0279961	1	4.63196	real_variable_gene
DDB_G0279981	1	31.1575	real_variable_gene
DDB_G0279983	1	18.2546	real_variable_gene
DDB_G0280003	1	12.751	real_variable_gene
DDB_G0280005	1	6.15376	real_variable_gene
DDB_G0280019	1	71.0839	real_variable_gene
DDB_G0280029	1	25.7272	real_variable_gene
DDB_G0280045	1	103.114	real_variable_gene
DDB_G0280059	1	155.036	real_variable_gene
DDB_G0280065	1	20.8793	real_variable_gene
DDB_G0280083	1	8.34317	real_variable_gene
DDB_G0280117	1	40.7944	real_variable_gene
DDB_G0280125	1	84.6096	real_variable_gene
DDB_G0280167	1	52.8324	real_variable_gene
DDB_G0280171	1	406.108	real_variable_gene
DDB_G0280183	1	9.53057	real_variable_gene
DDB_G0280197	1	9.74274	real_variable_gene
DDB_G0280215	1	25.2267	real_variable_gene
DDB_G0280239	1	84.9948	real_variable_gene
DDB_G0280253	1	49.082	real_variable_gene
DDB_G0280295	1	277.745	real_variable_gene
DDB_G0280321	1	7.24625	real_variable_gene
DDB_G0280343	1	42.7003	real_variable_gene
DDB_G0280375	1	12.9166	real_variable_gene
DDB_G0280377	1	8.36362	real_variable_gene
DDB_G0280525	1	67.3291	real_variable_gene
DDB_G0280527	1	91.9885	real_variable_gene
DDB_G0280545	1	83.5482	real_variable_gene
DDB_G0280549	1	78.7226	real_variable_gene
DDB_G0280559	1	10.2439	real_variable_gene
DDB_G0280575	1	6.33961	real_variable_gene
DDB_G0280585	1	307.174	real_variable_gene
DDB_G0280587	1	15.655	real_variable_gene
DDB_G0280589	1	2.54266	real_variable_gene
DDB_G0280593	1	288.955	real_variable_gene
DDB_G0280639	1	34.1175	real_variable_gene
DDB_G0280693	1	3.33835	real_variable_gene
DDB_G0280699	1	85.4481	real_variable_gene
DDB_G0280739	1	8.36761	real_variable_gene
DDB_G0280853	1	3.52275	real_variable_gene
DDB_G0280867	1	7.47488	real_variable_gene
DDB_G0280943	1	2.01265	real_variable_gene
DDB_G0280971	1	243.015	real_variable_gene
DDB_G0280995	1	4.43288	real_variable_gene
DDB_G0281049	1	83.3524	real_variable_gene
DDB_G0281059	1	15.0653	real_variable_gene
DDB_G0281081	1	131.319	real_variable_gene
DDB_G0281115	1	156.542	real_variable_gene
DDB_G0281123	1	17.9473	real_variable_gene
DDB_G0281155	1	23.5557	real_variable_gene
DDB_G0281159	1	2.53186	real_variable_gene
DDB_G0281167	1	89.9998	real_variable_gene
DDB_G0281231	1	6.07658	real_variable_gene
DDB_G0281239	1	326.036	real_variable_gene
DDB_G0281241	1	44.1313	real_variable_gene
DDB_G0281313	1	7.59254	real_variable_gene
DDB_G0281345	1	18.88	real_variable_gene
DDB_G0281353	1	37.5433	real_variable_gene
DDB_G0281377	1	12.8306	real_variable_gene
DDB_G0281401	1	31.4268	real_variable_gene
DDB_G0281415	1	54.2997	real_variable_gene
DDB_G0281461	1	8.96248	real_variable_gene
DDB_G0281499	1	193.105	real_variable_gene
DDB_G0281501	1	51.7861	real_variable_gene
DDB_G0281545	1	19.5054	real_variable_gene
DDB_G0281591	1	21.9021	real_variable_gene
DDB_G0281651	1	19.3372	real_variable_gene
DDB_G0281669	1	97.0289	real_variable_gene
DDB_G0281683	1	40.0128	real_variable_gene
DDB_G0281687	1	64.2575	real_variable_gene
DDB_G0281691	1	9.70653	real_variable_gene
DDB_G0281717	1	6.36755	real_variable_gene
DDB_G0281767	1	15.5295	real_variable_gene
DDB_G0281829	1	64.9825	real_variable_gene
DDB_G0281871	1	13.8197	real_variable_gene
DDB_G0281895	1	2.419	real_variable_gene
DDB_G0281921	1	4.79747	real_variable_gene
DDB_G0281947	1	177.566	real_variable_gene
DDB_G0281955	1	64.7065	real_variable_gene
DDB_G0281959	1	3.18741	real_variable_gene
DDB_G0281981	1	176.785	real_variable_gene
DDB_G0282049	1	9.72731	real_variable_gene
DDB_G0282069	1	3.10979	real_variable_gene
DDB_G0282095	1	59.479	real_variable_gene
DDB_G0282099	1	202.985	real_variable_gene
DDB_G0282101	1	44.0099	real_variable_gene
DDB_G0282175	1	30.8918	real_variable_gene
DDB_G0282191	1	65.5121	real_variable_gene
DDB_G0282241	1	8.59043	real_variable_gene
DDB_G0282245	1	37.5725	real_variable_gene
DDB_G0282275	1	27.1934	real_variable_gene
DDB_G0282337	1	100.957	real_variable_gene
DDB_G0282373	1	18.0536	real_variable_gene
DDB_G0282377	1	22.6782	real_variable_gene
DDB_G0282417	1	6.90095	real_variable_gene
DDB_G0282427	1	74.5154	real_variable_gene
DDB_G0282471	1	150.21	real_variable_gene
DDB_G0282615	1	31.005	real_variable_gene
DDB_G0282627	1	50.6771	real_variable_gene
DDB_G0282717	1	45.2733	real_variable_gene
DDB_G0282719	1	23.6265	real_variable_gene
DDB_G0282731	1	14.4559	real_variable_gene
DDB_G0282737	1	2.81053	real_variable_gene
DDB_G0282765	1	21.8692	real_variable_gene
DDB_G0282783	1	52.2973	real_variable_gene
DDB_G0282817	1	5682.98	real_variable_gene
DDB_G0282877	1	15.2088	real_variable_gene
DDB_G0282891	1	41.5698	real_variable_gene
DDB_G0282893	1	8.49189	real_variable_gene
DDB_G0282919	1	16.3439	real_variable_gene
DDB_G0282927	1	68.2489	real_variable_gene
DDB_G0282933	1	22.3862	real_variable_gene
DDB_G0282941	1	52.5845	real_variable_gene
DDB_G0282943	1	235.091	real_variable_gene
DDB_G0282963	1	30.7546	real_variable_gene
DDB_G0282975	1	25.2562	real_variable_gene
DDB_G0282983	1	8.80309	real_variable_gene
DDB_G0282995	1	13.0059	real_variable_gene
DDB_G0282997	1	65.8953	real_variable_gene
DDB_G0283077	1	15.7279	real_variable_gene
DDB_G0283085	1	78.8587	real_variable_gene
DDB_G0283109	1	44.038	real_variable_gene
DDB_G0283149	1	230.323	real_variable_gene
DDB_G0283155	1	28.153	real_variable_gene
DDB_G0283175	1	26.977	real_variable_gene
DDB_G0283261	1	313.542	real_variable_gene
DDB_G0283265	1	22.7539	real_variable_gene
DDB_G0283285	1	70.1092	real_variable_gene
DDB_G0283287	1	36.768	real_variable_gene
DDB_G0283289	1	4.87114	real_variable_gene
DDB_G0283303	1	38.2364	real_variable_gene
DDB_G0283387	1	3.7395	real_variable_gene
DDB_G0283427	1	52.3876	real_variable_gene
DDB_G0283547	1	8.11946	real_variable_gene
DDB_G0283557	1	332.336	real_variable_gene
DDB_G0283585	1	32.3744	real_variable_gene
DDB_G0283607	1	44.2973	real_variable_gene
DDB_G0283733	1	51.3067	real_variable_gene
DDB_G0283771	1	22.8504	real_variable_gene
DDB_G0283783	1	22.8099	real_variable_gene
DDB_G0283785	1	4.35669	real_variable_gene
DDB_G0283787	1	9.0575	real_variable_gene
DDB_G0283817	1	43.971	real_variable_gene
DDB_G0283827	1	29.3979	real_variable_gene
DDB_G0283857	1	14.0583	real_variable_gene
DDB_G0283867	1	131.535	real_variable_gene
DDB_G0283869	1	9.98544	real_variable_gene
DDB_G0283907	1	30.0869	real_variable_gene
DDB_G0283915	1	161.559	real_variable_gene
DDB_G0283951	1	73.5502	real_variable_gene
DDB_G0283961	1	1.52965	real_variable_gene
DDB_G0283965	1	11.0738	real_variable_gene
DDB_G0283979	1	6.44049	real_variable_gene
DDB_G0283985	1	8.78912	real_variable_gene
DDB_G0283989	1	215.23	real_variable_gene
DDB_G0283993	1	74.121	real_variable_gene
DDB_G0283995	1	6.43861	real_variable_gene
DDB_G0284003	1	2.26994	real_variable_gene
DDB_G0284059	1	80.3212	real_variable_gene
DDB_G0284071	1	187.226	real_variable_gene
DDB_G0284073	1	36.341	real_variable_gene
DDB_G0284075	1	745.826	real_variable_gene
DDB_G0284135	1	421.261	real_variable_gene
DDB_G0284155	1	93.9554	real_variable_gene
DDB_G0284157	1	11.5164	real_variable_gene
DDB_G0284227	1	34.0232	real_variable_gene
DDB_G0284255	1	12.8667	real_variable_gene
DDB_G0284295	1	7.23713	real_variable_gene
DDB_G0284315	1	28.832	real_variable_gene
DDB_G0284317	1	19.1874	real_variable_gene
DDB_G0284319	1	238.489	real_variable_gene
DDB_G0284325	1	3.27683	real_variable_gene
DDB_G0284337	1	21.6423	real_variable_gene
DDB_G0284345	1	114.243	real_variable_gene
DDB_G0284411	1	54.1613	real_variable_gene
DDB_G0284449	1	36.8166	real_variable_gene
DDB_G0284477	1	14.6106	real_variable_gene
DDB_G0284481	1	90.8629	real_variable_gene
DDB_G0284497	1	4.92749	real_variable_gene
DDB_G0284511	1	30.4095	real_variable_gene
DDB_G0284535	1	148.561	real_variable_gene
DDB_G0284549	1	77.2405	real_variable_gene
DDB_G0284555	1	44.0419	real_variable_gene
DDB_G0284639	1	16.6665	real_variable_gene
DDB_G0284651	1	67.852	real_variable_gene
DDB_G0284677	1	108.854	real_variable_gene
DDB_G0284727	1	58.3829	real_variable_gene
DDB_G0284759	1	27.015	real_variable_gene
DDB_G0284771	1	9.6112	real_variable_gene
DDB_G0284773	1	56.7805	real_variable_gene
DDB_G0284777	1	80.2747	real_variable_gene
DDB_G0284845	1	206.982	real_variable_gene
DDB_G0284849	1	26.4333	real_variable_gene
DDB_G0284855	1	52.4593	real_variable_gene
DDB_G0284863	1	79.9449	real_variable_gene
DDB_G0284895	1	1.37868	real_variable_gene
DDB_G0284913	1	22.9002	real_variable_gene
DDB_G0284921	1	144.4	real_variable_gene
DDB_G0285001	1	1.76516	real_variable_gene
DDB_G0285083	1	39.4742	real_variable_gene
DDB_G0285165	1	138.901	real_variable_gene
DDB_G0285207	1	75.1533	real_variable_gene
DDB_G0285281	1	81.7087	real_variable_gene
DDB_G0285321	1	70.2574	real_variable_gene
DDB_G0285339	1	30.9537	real_variable_gene
DDB_G0285401	1	39.7173	real_variable_gene
DDB_G0285421	1	22.5038	real_variable_gene
DDB_G0285555	1	14.5115	real_variable_gene
DDB_G0285565	1	3.15411	real_variable_gene
DDB_G0285575	1	148.874	real_variable_gene
DDB_G0285599	1	47.2069	real_variable_gene
DDB_G0285601	1	19.9909	real_variable_gene
DDB_G0285615	1	1224.1	real_variable_gene
DDB_G0285641	1	30.4204	real_variable_gene
DDB_G0285697	1	8.45255	real_variable_gene
DDB_G0285753	1	26.2314	real_variable_gene
DDB_G0285801	1	43.6308	real_variable_gene
DDB_G0285813	1	72.6756	real_variable_gene
DDB_G0285819	1	26.8933	real_variable_gene
DDB_G0285847	1	89.5024	real_variable_gene
DDB_G0285893	1	162.578	real_variable_gene
DDB_G0285933	1	5.70632	real_variable_gene
DDB_G0285937	1	22.2524	real_variable_gene
DDB_G0285939	1	62.5369	real_variable_gene
DDB_G0285989	1	2.31424	real_variable_gene
DDB_G0286027	1	33.0899	real_variable_gene
DDB_G0286035	1	9.53785	real_variable_gene
DDB_G0286049	1	39.7743	real_variable_gene
DDB_G0286055	1	2.89763	real_variable_gene
DDB_G0286073	1	3.01484	real_variable_gene
DDB_G0286121	1	9.94196	real_variable_gene
DDB_G0286123	1	15.6283	real_variable_gene
DDB_G0286205	1	122.251	real_variable_gene
DDB_G0286219	1	123.347	real_variable_gene
DDB_G0286223	1	34.154	real_variable_gene
DDB_G0286237	1	6.34904	real_variable_gene
DDB_G0286243	1	5.07039	real_variable_gene
DDB_G0286251	1	74.8551	real_variable_gene
DDB_G0286265	1	12.1872	real_variable_gene
DDB_G0286267	1	23.0401	real_variable_gene
DDB_G0286277	1	29.8889	real_variable_gene
DDB_G0286295	1	50.9656	real_variable_gene
DDB_G0286299	1	13.8412	real_variable_gene
DDB_G0286303	1	73.7362	real_variable_gene
DDB_G0286311	1	10.495	real_variable_gene
DDB_G0286375	1	11.3981	real_variable_gene
DDB_G0286385	1	8.78248	real_variable_gene
DDB_G0286395	1	70.3343	real_variable_gene
DDB_G0286409	1	9.92162	real_variable_gene
DDB_G0286413	1	5.66533	real_variable_gene
DDB_G0286465	1	3.10413	real_variable_gene
DDB_G0286491	1	1.95971	real_variable_gene
DDB_G0286525	1	43.2131	real_variable_gene
DDB_G0286533	1	14.251	real_variable_gene
DDB_G0286549	1	24.5664	real_variable_gene
DDB_G0286563	1	18.3175	real_variable_gene
DDB_G0286585	1	110.873	real_variable_gene
DDB_G0286621	1	20.1967	real_variable_gene
DDB_G0286623	1	11.1476	real_variable_gene
DDB_G0286643	1	147.845	real_variable_gene
DDB_G0286677	1	47.9216	real_variable_gene
DDB_G0286735	1	49.7329	real_variable_gene
DDB_G0286741	1	18.3462	real_variable_gene
DDB_G0286765	1	19.8336	real_variable_gene
DDB_G0286839	1	122.449	real_variable_gene
DDB_G0286853	1	36.9545	real_variable_gene
DDB_G0286869	1	16.9637	real_variable_gene
DDB_G0286881	1	13.5844	real_variable_gene
DDB_G0286895	1	52.8963	real_variable_gene
DDB_G0286911	1	15.9654	real_variable_gene
DDB_G0286925	1	34.1336	real_variable_gene
DDB_G0286945	1	55.2304	real_variable_gene
DDB_G0286947	1	18.1511	real_variable_gene
DDB_G0286963	1	35.7919	real_variable_gene
DDB_G0286999	1	33.4441	real_variable_gene
DDB_G0287103	1	3.64682	real_variable_gene
DDB_G0287193	1	5.14889	real_variable_gene
DDB_G0287293	1	9.52635	real_variable_gene
DDB_G0287315	1	53.9065	real_variable_gene
DDB_G0287319	1	2.37426	real_variable_gene
DDB_G0287323	1	25.2098	real_variable_gene
DDB_G0287331	1	98.7838	real_variable_gene
DDB_G0287379	1	365.121	real_variable_gene
DDB_G0287383	1	46.4527	real_variable_gene
DDB_G0287407	1	71.5387	real_variable_gene
DDB_G0287415	1	725.385	real_variable_gene
DDB_G0287427	1	20.1055	real_variable_gene
DDB_G0287545	1	145.883	real_variable_gene
DDB_G0287581	1	74.6588	real_variable_gene
DDB_G0287583	1	3.65356	real_variable_gene
DDB_G0287615	1	10.3698	real_variable_gene
DDB_G0287665	1	4.03744	real_variable_gene
DDB_G0287669	1	129.595	real_variable_gene
DDB_G0287695	1	5.94656	real_variable_gene
DDB_G0287701	1	11.4593	real_variable_gene
DDB_G0287727	1	97.0984	real_variable_gene
DDB_G0287803	1	62.8223	real_variable_gene
DDB_G0287813	1	75.0801	real_variable_gene
DDB_G0287815	1	11.1759	real_variable_gene
DDB_G0287825	1	83.9838	real_variable_gene
DDB_G0287831	1	49.9718	real_variable_gene
DDB_G0287973	1	39.1146	real_variable_gene
DDB_G0287997	1	5.15512	real_variable_gene
DDB_G0288001	1	163.481	real_variable_gene
DDB_G0288021	1	14.8813	real_variable_gene
DDB_G0288031	1	11.3085	real_variable_gene
DDB_G0288093	1	257.18	real_variable_gene
DDB_G0288097	1	20.6163	real_variable_gene
DDB_G0288103	1	3.71407	real_variable_gene
DDB_G0288123	1	19.9333	real_variable_gene
DDB_G0288129	1	11.3467	real_variable_gene
DDB_G0288179	1	9.0988	real_variable_gene
DDB_G0288193	1	4.23898	real_variable_gene
DDB_G0288205	1	8.59797	real_variable_gene
DDB_G0288227	1	19.9661	real_variable_gene
DDB_G0288231	1	26.9182	real_variable_gene
DDB_G0288245	1	23.8315	real_variable_gene
DDB_G0288259	1	535.935	real_variable_gene
DDB_G0288261	1	6.70524	real_variable_gene
DDB_G0288283	1	14.9276	real_variable_gene
DDB_G0288301	1	40.8715	real_variable_gene
DDB_G0288317	1	21.9903	real_variable_gene
DDB_G0288323	1	26.3087	real_variable_gene
DDB_G0288327	1	96.0009	real_variable_gene
DDB_G0288331	1	122.729	real_variable_gene
DDB_G0288361	1	10.778	real_variable_gene
DDB_G0288363	1	4.48695	real_variable_gene
DDB_G0288375	1	61.3043	real_variable_gene
DDB_G0288437	1	18.9638	real_variable_gene
DDB_G0288455	1	13.685	real_variable_gene
DDB_G0288457	1	21.7453	real_variable_gene
DDB_G0288475	1	25.1662	real_variable_gene
DDB_G0288485	1	51.9805	real_variable_gene
DDB_G0288489	1	10.5283	real_variable_gene
DDB_G0288517	1	40.1106	real_variable_gene
DDB_G0288529	1	25.9488	real_variable_gene
DDB_G0288591	1	74.895	real_variable_gene
DDB_G0288599	1	59.1776	real_variable_gene
DDB_G0288705	1	332.355	real_variable_gene
DDB_G0288755	1	28.3791	real_variable_gene
DDB_G0288789	1	49.7698	real_variable_gene
DDB_G0288791	1	48.9571	real_variable_gene
DDB_G0288797	1	55.4626	real_variable_gene
DDB_G0288861	1	26.1384	real_variable_gene
DDB_G0288885	1	2.38235	real_variable_gene
DDB_G0288923	1	14.1247	real_variable_gene
DDB_G0288939	1	58.7868	real_variable_gene
DDB_G0288947	1	125.847	real_variable_gene
DDB_G0288977	1	138.624	real_variable_gene
DDB_G0289013	1	181.2	real_variable_gene
DDB_G0289039	1	55.4373	real_variable_gene
DDB_G0289041	1	67.4246	real_variable_gene
DDB_G0289051	1	42.6961	real_variable_gene
DDB_G0289105	1	6.94049	real_variable_gene
DDB_G0289117	1	53.7888	real_variable_gene
DDB_G0289143	1	10.6864	real_variable_gene
DDB_G0289193	1	49.4781	real_variable_gene
DDB_G0289205	1	15.9635	real_variable_gene
DDB_G0289207	1	31.9884	real_variable_gene
DDB_G0289293	1	4.36448	real_variable_gene
DDB_G0289331	1	2.96019	real_variable_gene
DDB_G0289349	1	25.159	real_variable_gene
DDB_G0289351	1	18.1187	real_variable_gene
DDB_G0289429	1	118.025	real_variable_gene
DDB_G0289485	1	333.353	real_variable_gene
DDB_G0289487	1	14.9717	real_variable_gene
DDB_G0289489	1	135.356	real_variable_gene
DDB_G0289505	1	10.8721	real_variable_gene
DDB_G0289507	1	29.6562	real_variable_gene
DDB_G0289511	1	33.2872	real_variable_gene
DDB_G0289513	1	127.623	real_variable_gene
DDB_G0289533	1	37.9146	real_variable_gene
DDB_G0289539	1	164.721	real_variable_gene
DDB_G0289575	1	5.02057	real_variable_gene
DDB_G0289659	1	7.964	real_variable_gene
DDB_G0289703	1	22.1435	real_variable_gene
DDB_G0289705	1	121.184	real_variable_gene
DDB_G0289719	1	104.716	real_variable_gene
DDB_G0289759	1	352.564	real_variable_gene
DDB_G0289791	1	11.9668	real_variable_gene
DDB_G0289813	1	3.2108	real_variable_gene
DDB_G0289815	1	19.5904	real_variable_gene
DDB_G0289859	1	29.9238	real_variable_gene
DDB_G0289867	1	14.591	real_variable_gene
DDB_G0289901	1	3.23083	real_variable_gene
DDB_G0289919	1	39.3811	real_variable_gene
DDB_G0289949	1	133.525	real_variable_gene
DDB_G0290035	1	4.62972	real_variable_gene
DDB_G0290079	1	9.83937	real_variable_gene
DDB_G0290111	1	14.5664	real_variable_gene
DDB_G0290191	1	14.0106	real_variable_gene
DDB_G0290197	1	347.43	real_variable_gene
DDB_G0290245	1	38.0859	real_variable_gene
DDB_G0290259	1	100.238	real_variable_gene
DDB_G0290261	1	220.886	real_variable_gene
DDB_G0290265	1	82.6907	real_variable_gene
DDB_G0290267	1	5.05483	real_variable_gene
DDB_G0290305	1	13.8034	real_variable_gene
DDB_G0290307	1	121.564	real_variable_gene
DDB_G0290405	1	20.9107	real_variable_gene
DDB_G0290431	1	157.978	real_variable_gene
DDB_G0290467	1	0.984755	real_variable_gene
DDB_G0290481	1	49.4274	real_variable_gene
DDB_G0290557	1	2.16613	real_variable_gene
DDB_G0290563	1	8.18265	real_variable_gene
DDB_G0290635	1	1.4399	real_variable_gene
DDB_G0290647	1	13.0038	real_variable_gene
DDB_G0290679	1	3.46239	real_variable_gene
DDB_G0290745	1	406.05	real_variable_gene
DDB_G0290841	1	4.70817	real_variable_gene
DDB_G0290853	1	2.02931	real_variable_gene
DDB_G0290873	1	98.2015	real_variable_gene
DDB_G0290901	1	40.6928	real_variable_gene
DDB_G0290957	1	18.1666	real_variable_gene
DDB_G0290959	1	27.8524	real_variable_gene
DDB_G0290985	1	15.2669	real_variable_gene
DDB_G0291133	1	6.03591	real_variable_gene
DDB_G0291147	1	14.174	real_variable_gene
DDB_G0291171	1	5.22217	real_variable_gene
DDB_G0291181	1	4.06268	real_variable_gene
DDB_G0291203	1	46.4155	real_variable_gene
DDB_G0291205	1	8.08214	real_variable_gene
DDB_G0291231	1	1192.49	real_variable_gene
DDB_G0291239	1	143.228	real_variable_gene
DDB_G0291263	1	7.41578	real_variable_gene
DDB_G0291279	1	125.665	real_variable_gene
DDB_G0291291	1	7.833	real_variable_gene
DDB_G0291301	1	158.903	real_variable_gene
DDB_G0291314	1	86.9549	real_variable_gene
DDB_G0291330	1	184.295	real_variable_gene
DDB_G0291436	1	8.70483	real_variable_gene
DDB_G0291444	1	39.4951	real_variable_gene
DDB_G0291474	1	33.413	real_variable_gene
DDB_G0291476	1	18.755	real_variable_gene
DDB_G0291486	1	42.6205	real_variable_gene
DDB_G0291554	1	24.1822	real_variable_gene
DDB_G0291568	1	24.7575	real_variable_gene
DDB_G0291570	1	4.04577	real_variable_gene
DDB_G0291608	1	57.4566	real_variable_gene
DDB_G0291632	1	3.34418	real_variable_gene
DDB_G0291658	1	20.2294	real_variable_gene
DDB_G0291668	1	1.49056	real_variable_gene
DDB_G0291670	1	73.7219	real_variable_gene
DDB_G0291708	1	278.961	real_variable_gene
DDB_G0291714	1	9.07075	real_variable_gene
DDB_G0291738	1	63.74	real_variable_gene
DDB_G0291752	1	16.6496	real_variable_gene
DDB_G0291758	1	34.5283	real_variable_gene
DDB_G0291812	1	6.31994	real_variable_gene
DDB_G0291814	1	50.4352	real_variable_gene
DDB_G0291818	1	18.1544	real_variable_gene
DDB_G0291868	1	46.8747	real_variable_gene
DDB_G0291896	1	87.0902	real_variable_gene
DDB_G0291952	1	7.28401	real_variable_gene
DDB_G0292004	1	8.87256	real_variable_gene
DDB_G0292010	1	65.9738	real_variable_gene
DDB_G0292054	1	39.8545	real_variable_gene
DDB_G0292056	1	67.8511	real_variable_gene
DDB_G0292080	1	77.5257	real_variable_gene
DDB_G0292112	1	2.49228	real_variable_gene
DDB_G0292152	1	3.48381	real_variable_gene
DDB_G0292168	1	28.0934	real_variable_gene
DDB_G0292218	1	2.76577	real_variable_gene
DDB_G0292230	1	131.567	real_variable_gene
DDB_G0292236	1	38.4002	real_variable_gene
DDB_G0292262	1	58.7457	real_variable_gene
DDB_G0292280	1	1.76195	real_variable_gene
DDB_G0292286	1	65.0607	real_variable_gene
DDB_G0292350	1	29.1287	real_variable_gene
DDB_G0292368	1	28.0889	real_variable_gene
DDB_G0292434	1	5.00909	real_variable_gene
DDB_G0292446	1	31.2656	real_variable_gene
DDB_G0292454	1	4.87502	real_variable_gene
DDB_G0292458	1	28.2839	real_variable_gene
DDB_G0292462	1	13.8587	real_variable_gene
DDB_G0292478	1	36.6521	real_variable_gene
DDB_G0292480	1	350.853	real_variable_gene
DDB_G0292520	1	26.2273	real_variable_gene
DDB_G0292538	1	4294.45	real_variable_gene
DDB_G0292544	1	5.80583	real_variable_gene
DDB_G0292586	1	64.002	real_variable_gene
DDB_G0292606	1	13.8746	real_variable_gene
DDB_G0292622	1	89.175	real_variable_gene
DDB_G0292632	1	4.15554	real_variable_gene
DDB_G0292654	1	15.6996	real_variable_gene
DDB_G0292676	1	7.81102	real_variable_gene
DDB_G0292680	1	89.0537	real_variable_gene
DDB_G0292682	1	113.732	real_variable_gene
DDB_G0292736	1	289.608	real_variable_gene
DDB_G0292746	1	28.6558	real_variable_gene
DDB_G0292760	1	6.70967	real_variable_gene
DDB_G0292786	1	23.5539	real_variable_gene
DDB_G0292790	1	16.2043	real_variable_gene
DDB_G0292816	1	4.15235	real_variable_gene
DDB_G0292822	1	5.39545	real_variable_gene
DDB_G0292840	1	41.7764	real_variable_gene
DDB_G0292846	1	7.81383	real_variable_gene
DDB_G0292880	1	66.7507	real_variable_gene
DDB_G0292884	1	13.1373	real_variable_gene
DDB_G0292912	1	21.8294	real_variable_gene
DDB_G0292926	1	23.0404	real_variable_gene
DDB_G0292972	1	264.623	real_variable_gene
DDB_G0293002	1	25.0654	real_variable_gene
DDB_G0293036	1	25.4108	real_variable_gene
DDB_G0293060	1	264.502	real_variable_gene
DDB_G0293110	1	44.427	real_variable_gene
DDB_G0293116	1	18.5622	real_variable_gene
DDB_G0293148	1	55.3636	real_variable_gene
DDB_G0293182	1	7.46368	real_variable_gene
DDB_G0293210	1	146.678	real_variable_gene
DDB_G0293212	1	177.883	real_variable_gene
DDB_G0293258	1	6.95678	real_variable_gene
DDB_G0293300	1	44.6424	real_variable_gene
DDB_G0293364	1	61.6494	real_variable_gene
DDB_G0293412	1	92.582	real_variable_gene
DDB_G0293414	1	266.705	real_variable_gene
DDB_G0293458	1	9.72458	real_variable_gene
DDB_G0293466	1	2.28033	real_variable_gene
DDB_G0293488	1	5.87044	real_variable_gene
DDB_G0293492	1	121.811	real_variable_gene
DDB_G0293546	1	21.9021	real_variable_gene
DDB_G0293596	1	62.2978	real_variable_gene
DDB_G0293640	1	38.1628	real_variable_gene
DDB_G0293664	1	1.8355	real_variable_gene
DDB_G0293674	1	15.6461	real_variable_gene
DDB_G0293678	1	11.8166	real_variable_gene
DDB_G0293730	1	10.4873	real_variable_gene
DDB_G0293762	1	53.6986	real_variable_gene
DDB_G0293792	1	35.2977	real_variable_gene
DDB_G0293824	1	136.147	real_variable_gene
DDB_G0293836	1	12.9004	real_variable_gene
DDB_G0293864	1	1.97367	real_variable_gene
DDB_G0293884	1	7.6123	real_variable_gene
DDB_G0293932	1	64.8683	real_variable_gene
DDB_G0293998	1	13.0186	real_variable_gene
DDB_G0294473	1	11.3536	real_variable_gene
DDB_G0294499	1	69.2645	real_variable_gene
DDB_G0294515	1	61.6243	real_variable_gene
DDB_G0294587	1	75.0217	real_variable_gene
DDB_G0294621	1	205.566	real_variable_gene
DDB_G0294635	1	1.5459	real_variable_gene
DDB_G0295793	1	41.4027	real_variable_gene
DDB_G0295801	1	5.95689	real_variable_gene
DDB_G0295827	1	4.93025	real_variable_gene
DDB_G0295849	1	100.352	real_variable_gene
DDB_G0304561	1	31.2863	real_variable_gene
DDB_G0267388	1	2.98864	real_variable_gene
DDB_G0267396	1	19.7938	real_variable_gene
DDB_G0267404	1	32.484	real_variable_gene
DDB_G0267412	1	18.0982	real_variable_gene
DDB_G0267414	1	48.8123	real_variable_gene
DDB_G0267416	1	85.8203	real_variable_gene
DDB_G0267442	1	35.8118	real_variable_gene
DDB_G0267456	1	64.7428	real_variable_gene
DDB_G0267464	1	78.6879	real_variable_gene
DDB_G0267472	1	17.899	real_variable_gene
DDB_G0267490	1	106.94	real_variable_gene
DDB_G0267492	1	84.9252	real_variable_gene
DDB_G0267502	1	2.7367	real_variable_gene
DDB_G0267516	1	44.486	real_variable_gene
DDB_G0267566	1	9.792	real_variable_gene
DDB_G0267602	1	12.0657	real_variable_gene
DDB_G0267620	1	2.54034	real_variable_gene
DDB_G0267628	1	2.3358	real_variable_gene
DDB_G0267686	1	23.527	real_variable_gene
DDB_G0267688	1	10.0002	real_variable_gene
DDB_G0267732	1	10.6205	real_variable_gene
DDB_G0267758	1	77.1225	real_variable_gene
DDB_G0267766	1	32.2222	real_variable_gene
DDB_G0267792	1	23.1777	real_variable_gene
DDB_G0267818	1	15.0726	real_variable_gene
DDB_G0267830	1	7.16433	real_variable_gene
DDB_G0267872	1	66.5742	real_variable_gene
DDB_G0267886	1	27.7507	real_variable_gene
DDB_G0267898	1	9.50402	real_variable_gene
DDB_G0267904	1	74.1712	real_variable_gene
DDB_G0267934	1	20.8226	real_variable_gene
DDB_G0267980	1	27.2871	real_variable_gene
DDB_G0268008	1	66.2615	real_variable_gene
DDB_G0268028	1	43.1509	real_variable_gene
DDB_G0268060	1	97.1504	real_variable_gene
DDB_G0268084	1	41.9121	real_variable_gene
DDB_G0268088	1	62.8449	real_variable_gene
DDB_G0268122	1	37.5932	real_variable_gene
DDB_G0268124	1	30.6825	real_variable_gene
DDB_G0268144	1	37.3056	real_variable_gene
DDB_G0268156	1	88.2076	real_variable_gene
DDB_G0268194	1	35.4594	real_variable_gene
DDB_G0268216	1	18.9352	real_variable_gene
DDB_G0268322	1	14.2798	real_variable_gene
DDB_G0268444	1	41.7598	real_variable_gene
DDB_G0268484	1	4.14445	real_variable_gene
DDB_G0268498	1	74.9454	real_variable_gene
DDB_G0268590	1	7.17678	real_variable_gene
DDB_G0268600	1	37.4148	real_variable_gene
DDB_G0268616	1	23.8644	real_variable_gene
DDB_G0268642	1	58.5148	real_variable_gene
DDB_G0268718	1	16.9417	real_variable_gene
DDB_G0268854	1	138.425	real_variable_gene
DDB_G0268864	1	16.4656	real_variable_gene
DDB_G0268868	1	742.54	real_variable_gene
DDB_G0268880	1	10.092	real_variable_gene
DDB_G0268914	1	45.6945	real_variable_gene
DDB_G0269008	1	4.09408	real_variable_gene
DDB_G0269026	1	3.13618	real_variable_gene
DDB_G0269044	1	5.70929	real_variable_gene
DDB_G0269046	1	82.1558	real_variable_gene
DDB_G0269088	1	101.333	real_variable_gene
DDB_G0269108	1	26.1516	real_variable_gene
DDB_G0269112	1	152.184	real_variable_gene
DDB_G0269124	1	28.0701	real_variable_gene
DDB_G0269126	1	114.063	real_variable_gene
DDB_G0269132	1	15.4068	real_variable_gene
DDB_G0269152	1	7.12931	real_variable_gene
DDB_G0269198	1	93.8577	real_variable_gene
DDB_G0269202	1	973.914	real_variable_gene
DDB_G0269204	1	30.0345	real_variable_gene
DDB_G0269226	1	72.2334	real_variable_gene
DDB_G0269246	1	128.518	real_variable_gene
DDB_G0269250	1	84.3989	real_variable_gene
DDB_G0269280	1	19.5478	real_variable_gene
DDB_G0269298	1	10.578	real_variable_gene
DDB_G0269350	1	15.3436	real_variable_gene
DDB_G0269362	1	201.865	real_variable_gene
DDB_G0269376	1	41.3613	real_variable_gene
DDB_G0269386	1	11.436	real_variable_gene
DDB_G0269406	1	7.58219	real_variable_gene
DDB_G0269448	1	54.1048	real_variable_gene
DDB_G0269452	1	6.07817	real_variable_gene
DDB_G0269454	1	795.013	real_variable_gene
DDB_G0269528	1	7.42895	real_variable_gene
DDB_G0269544	1	15.4868	real_variable_gene
DDB_G0269572	1	74.1095	real_variable_gene
DDB_G0269590	1	11.6364	real_variable_gene
DDB_G0269592	1	23.9099	real_variable_gene
DDB_G0269678	1	3.23568	real_variable_gene
DDB_G0269694	1	56.2003	real_variable_gene
DDB_G0269718	1	50.5958	real_variable_gene
DDB_G0269744	1	17.0971	real_variable_gene
DDB_G0269748	1	1.49732	real_variable_gene
DDB_G0269752	1	1.8425	real_variable_gene
DDB_G0269800	1	269.086	real_variable_gene
DDB_G0269872	1	8.88885	real_variable_gene
DDB_G0269896	1	37.8347	real_variable_gene
DDB_G0269914	1	25.8729	real_variable_gene
DDB_G0269928	1	29.9019	real_variable_gene
DDB_G0269962	1	9.37643	real_variable_gene
DDB_G0269982	1	183.364	real_variable_gene
DDB_G0270042	1	280.367	real_variable_gene
DDB_G0270056	1	12.6986	real_variable_gene
DDB_G0270066	1	6.54549	real_variable_gene
DDB_G0270078	1	3.84842	real_variable_gene
DDB_G0270088	1	9.42167	real_variable_gene
DDB_G0270096	1	102.701	real_variable_gene
DDB_G0270178	1	6.15821	real_variable_gene
DDB_G0270190	1	46.2253	real_variable_gene
DDB_G0270212	1	134.585	real_variable_gene
DDB_G0270214	1	172.697	real_variable_gene
DDB_G0270252	1	2.59366	real_variable_gene
DDB_G0270288	1	17.386	real_variable_gene
DDB_G0270292	1	7.94251	real_variable_gene
DDB_G0270294	1	17.8814	real_variable_gene
DDB_G0270328	1	60.7227	real_variable_gene
DDB_G0270406	1	19.8861	real_variable_gene
DDB_G0270418	1	66.2241	real_variable_gene
DDB_G0270442	1	72.305	real_variable_gene
DDB_G0270500	1	94.2249	real_variable_gene
DDB_G0270532	1	1.76283	real_variable_gene
DDB_G0270644	1	18.3696	real_variable_gene
DDB_G0270694	1	37.439	real_variable_gene
DDB_G0270724	1	17.7022	real_variable_gene
DDB_G0270730	1	113.796	real_variable_gene
DDB_G0270770	1	7.36846	real_variable_gene
DDB_G0270774	1	73.3092	real_variable_gene
DDB_G0270786	1	5.99201	real_variable_gene
DDB_G0270794	1	8.82048	real_variable_gene
DDB_G0270808	1	22.3691	real_variable_gene
DDB_G0270814	1	28.7049	real_variable_gene
DDB_G0271000	1	5.34341	real_variable_gene
DDB_G0271134	1	56.6753	real_variable_gene
DDB_G0271138	1	92.7024	real_variable_gene
DDB_G0271150	1	1.45657	real_variable_gene
DDB_G0271204	1	79.2686	real_variable_gene
DDB_G0271274	1	46.8937	real_variable_gene
DDB_G0271276	1	16.7966	real_variable_gene
DDB_G0271286	1	26.6435	real_variable_gene
DDB_G0271338	1	58.4128	real_variable_gene
DDB_G0271502	1	33.8955	real_variable_gene
DDB_G0271510	1	89.4662	real_variable_gene
DDB_G0271514	1	57.0394	real_variable_gene
DDB_G0271556	1	9.04411	real_variable_gene
DDB_G0271568	1	3.19908	real_variable_gene
DDB_G0271624	1	6.99504	real_variable_gene
DDB_G0271666	1	14.1172	real_variable_gene
DDB_G0271686	1	7.85699	real_variable_gene
DDB_G0271692	1	14.045	real_variable_gene
DDB_G0271732	1	146.123	real_variable_gene
DDB_G0271742	1	17.6446	real_variable_gene
DDB_G0271820	1	6.47145	real_variable_gene
DDB_G0271844	1	57.2469	real_variable_gene
DDB_G0271856	1	17.4608	real_variable_gene
DDB_G0271878	1	7.95794	real_variable_gene
DDB_G0271886	1	169.463	real_variable_gene
DDB_G0271914	1	8.09392	real_variable_gene
DDB_G0271962	1	20.4839	real_variable_gene
DDB_G0271996	1	6.0679	real_variable_gene
DDB_G0272002	1	15.7275	real_variable_gene
DDB_G0272014	1	37.6751	real_variable_gene
DDB_G0272028	1	22.4404	real_variable_gene
DDB_G0272030	1	85.6943	real_variable_gene
DDB_G0272042	1	16.5986	real_variable_gene
DDB_G0272072	1	61.1841	real_variable_gene
DDB_G0272080	1	54.498	real_variable_gene
DDB_G0272146	1	21.7535	real_variable_gene
DDB_G0272154	1	24.525	real_variable_gene
DDB_G0272198	1	4.95763	real_variable_gene
DDB_G0272242	1	72.1014	real_variable_gene
DDB_G0272244	1	34.8461	real_variable_gene
DDB_G0272254	1	12.0105	real_variable_gene
DDB_G0272276	1	2.27009	real_variable_gene
DDB_G0272298	1	82.2708	real_variable_gene
DDB_G0272300	1	8.97225	real_variable_gene
DDB_G0272310	1	3.75233	real_variable_gene
DDB_G0272344	1	158.226	real_variable_gene
DDB_G0272356	1	28.544	real_variable_gene
DDB_G0272372	1	20.5774	real_variable_gene
DDB_G0272382	1	102.511	real_variable_gene
DDB_G0272420	1	7.55066	real_variable_gene
DDB_G0272434	1	53.4594	real_variable_gene
DDB_G0272442	1	44.7745	real_variable_gene
DDB_G0272450	1	34.1019	real_variable_gene
DDB_G0272466	1	180.073	real_variable_gene
DDB_G0272468	1	2.15653	real_variable_gene
DDB_G0272484	1	31.3302	real_variable_gene
DDB_G0272498	1	22.6904	real_variable_gene
DDB_G0272500	1	13.6608	real_variable_gene
DDB_G0272512	1	9.76269	real_variable_gene
DDB_G0272688	1	5.73616	real_variable_gene
DDB_G0272706	1	9.95873	real_variable_gene
DDB_G0272736	1	5.99305	real_variable_gene
DDB_G0272760	1	14.7088	real_variable_gene
DDB_G0272771	1	291.605	real_variable_gene
DDB_G0272775	1	9.49243	real_variable_gene
DDB_G0272787	1	95.898	real_variable_gene
DDB_G0272823	1	12.7683	real_variable_gene
DDB_G0272833	1	5.94334	real_variable_gene
DDB_G0272869	1	60.5037	real_variable_gene
DDB_G0272991	1	32.1168	real_variable_gene
DDB_G0272999	1	7.84387	real_variable_gene
DDB_G0273539	1	63.7282	real_variable_gene
DDB_G0273625	1	191.173	real_variable_gene
DDB_G0273635	1	48.1335	real_variable_gene
DDB_G0273695	1	20.6705	real_variable_gene
DDB_G0273701	1	39.342	real_variable_gene
DDB_G0273787	1	6.4811	real_variable_gene
DDB_G0273809	1	57.8544	real_variable_gene
DDB_G0273867	1	21.7922	real_variable_gene
DDB_G0273949	1	68.4264	real_variable_gene
DDB_G0273969	1	5.38079	real_variable_gene
DDB_G0273991	1	4.66902	real_variable_gene
DDB_G0273993	1	18.0436	real_variable_gene
DDB_G0274027	1	364.891	real_variable_gene
DDB_G0274037	1	5.34554	real_variable_gene
DDB_G0274049	1	10.6755	real_variable_gene
DDB_G0274099	1	39.8499	real_variable_gene
DDB_G0274121	1	3.774	real_variable_gene
DDB_G0274171	1	186.692	real_variable_gene
DDB_G0274185	1	130.917	real_variable_gene
DDB_G0274209	1	8.64298	real_variable_gene
DDB_G0274217	1	1716.65	real_variable_gene
DDB_G0274265	1	12.1009	real_variable_gene
DDB_G0274307	1	16.1051	real_variable_gene
DDB_G0274309	1	20.1824	real_variable_gene
DDB_G0274317	1	2.84113	real_variable_gene
DDB_G0274351	1	4.76408	real_variable_gene
DDB_G0274389	1	50.0512	real_variable_gene
DDB_G0274391	1	6.16083	real_variable_gene
DDB_G0274425	1	58.6264	real_variable_gene
DDB_G0274427	1	8.90196	real_variable_gene
DDB_G0274429	1	8.18472	real_variable_gene
DDB_G0274481	1	242.78	real_variable_gene
DDB_G0274483	1	78.7258	real_variable_gene
DDB_G0274493	1	125.189	real_variable_gene
DDB_G0274503	1	5.47269	real_variable_gene
DDB_G0274527	1	24.9635	real_variable_gene
DDB_G0274537	1	34.4248	real_variable_gene
DDB_G0274545	1	44.013	real_variable_gene
DDB_G0274603	1	29.5331	real_variable_gene
DDB_G0274635	1	22.2819	real_variable_gene
DDB_G0274637	1	5.35349	real_variable_gene
DDB_G0274659	1	29.6949	real_variable_gene
DDB_G0274751	1	49.9462	real_variable_gene
DDB_G0274799	1	36.1639	real_variable_gene
DDB_G0274895	1	7.96111	real_variable_gene
DDB_G0274943	1	17.9916	real_variable_gene
DDB_G0274949	1	30.9517	real_variable_gene
DDB_G0274965	1	16.2386	real_variable_gene
DDB_G0274983	1	2.50024	real_variable_gene
DDB_G0275013	1	17.3659	real_variable_gene
DDB_G0275017	1	46.4758	real_variable_gene
DDB_G0275033	1	8.50091	real_variable_gene
DDB_G0275035	1	163.914	real_variable_gene
DDB_G0275063	1	36.9572	real_variable_gene
DDB_G0275065	1	278.649	real_variable_gene
DDB_G0275093	1	43.7821	real_variable_gene
DDB_G0275099	1	14.5748	real_variable_gene
DDB_G0275145	1	5.23649	real_variable_gene
DDB_G0275161	1	724.476	real_variable_gene
DDB_G0275163	1	119.589	real_variable_gene
DDB_G0275165	1	73.2045	real_variable_gene
DDB_G0275185	1	36.923	real_variable_gene
DDB_G0275195	1	6.53006	real_variable_gene
DDB_G0275223	1	18.4756	real_variable_gene
DDB_G0275225	1	30.1797	real_variable_gene
DDB_G0275257	1	68.67	real_variable_gene
DDB_G0275283	1	40.0377	real_variable_gene
DDB_G0275287	1	21.6498	real_variable_gene
DDB_G0275303	1	4.0199	real_variable_gene
DDB_G0275411	1	19.7157	real_variable_gene
DDB_G0275439	1	23.098	real_variable_gene
DDB_G0275467	1	316.539	real_variable_gene
DDB_G0275493	1	71.0695	real_variable_gene
DDB_G0275495	1	17.9617	real_variable_gene
DDB_G0275523	1	145.785	real_variable_gene
DDB_G0275605	1	26.9718	real_variable_gene
DDB_G0275617	1	8.09231	real_variable_gene
DDB_G0275623	1	6.30283	real_variable_gene
DDB_G0275637	1	138.426	real_variable_gene
DDB_G0275687	1	11.8942	real_variable_gene
DDB_G0275731	1	58.8016	real_variable_gene
DDB_G0275745	1	22.7117	real_variable_gene
DDB_G0275773	1	18.1572	real_variable_gene
DDB_G0275809	1	129.112	real_variable_gene
DDB_G0275823	1	101.966	real_variable_gene
DDB_G0275843	1	40.3292	real_variable_gene
DDB_G0275853	1	37.2627	real_variable_gene
DDB_G0275861	1	13.7401	real_variable_gene
DDB_G0275871	1	70.3119	real_variable_gene
DDB_G0275899	1	213.834	real_variable_gene
DDB_G0275919	1	17.7934	real_variable_gene
DDB_G0275999	1	21.838	real_variable_gene
DDB_G0276025	1	4.08187	real_variable_gene
DDB_G0276027	1	64.4568	real_variable_gene
DDB_G0276035	1	7.66289	real_variable_gene
DDB_G0276069	1	79.6883	real_variable_gene
DDB_G0276101	1	21.2283	real_variable_gene
DDB_G0276125	1	3.42177	real_variable_gene
DDB_G0276137	1	1058.03	real_variable_gene
DDB_G0276151	1	119.625	real_variable_gene
DDB_G0276157	1	21.8915	real_variable_gene
DDB_G0276181	1	20.9429	real_variable_gene
DDB_G0276205	1	176.135	real_variable_gene
DDB_G0276253	1	248.097	real_variable_gene
DDB_G0276255	1	55.7073	real_variable_gene
DDB_G0276269	1	249.098	real_variable_gene
DDB_G0276293	1	26.8008	real_variable_gene
DDB_G0276321	1	30.0548	real_variable_gene
DDB_G0276423	1	150.028	real_variable_gene
DDB_G0276435	1	5.44261	real_variable_gene
DDB_G0276527	1	4.70736	real_variable_gene
DDB_G0276531	1	550.965	real_variable_gene
DDB_G0276541	1	90.861	real_variable_gene
DDB_G0276545	1	15.9285	real_variable_gene
DDB_G0276577	1	150.485	real_variable_gene
DDB_G0276617	1	112.456	real_variable_gene
DDB_G0276657	1	44.1376	real_variable_gene
DDB_G0276663	1	34.9703	real_variable_gene
DDB_G0276673	1	22.5293	real_variable_gene
DDB_G0276847	1	52.5592	real_variable_gene
DDB_G0276851	1	73.2035	real_variable_gene
DDB_G0276873	1	137.327	real_variable_gene
DDB_G0276939	1	6.74716	real_variable_gene
DDB_G0276959	1	15.1879	real_variable_gene
DDB_G0276969	1	36.5081	real_variable_gene
DDB_G0276977	1	9.35495	real_variable_gene
DDB_G0277017	1	7.0572	real_variable_gene
DDB_G0277033	1	121.877	real_variable_gene
DDB_G0277035	1	36.15	real_variable_gene
DDB_G0277045	1	6.77754	real_variable_gene
DDB_G0277071	1	61.6283	real_variable_gene
DDB_G0277081	1	16.1564	real_variable_gene
DDB_G0277109	1	6.64527	real_variable_gene
DDB_G0277127	1	17.5484	real_variable_gene
DDB_G0277141	1	8.6533	real_variable_gene
DDB_G0277145	1	8.05554	real_variable_gene
DDB_G0277153	1	33.094	real_variable_gene
DDB_G0277211	1	60.8399	real_variable_gene
DDB_G0277217	1	27.8288	real_variable_gene
DDB_G0277253	1	102.507	real_variable_gene
DDB_G0277271	1	32.4901	real_variable_gene
DDB_G0277275	1	24.4245	real_variable_gene
DDB_G0277337	1	171.288	real_variable_gene
DDB_G0277347	1	16.724	real_variable_gene
DDB_G0277379	1	6.55178	real_variable_gene
DDB_G0277381	1	39.2048	real_variable_gene
DDB_G0277387	1	45.7511	real_variable_gene
DDB_G0277405	1	72.4374	real_variable_gene
DDB_G0277429	1	98.7243	real_variable_gene
DDB_G0277431	1	7.72609	real_variable_gene
DDB_G0277515	1	30.4328	real_variable_gene
DDB_G0277525	1	5.91135	real_variable_gene
DDB_G0277581	1	9.97239	real_variable_gene
DDB_G0277723	1	453.704	real_variable_gene
DDB_G0277773	1	6.39316	real_variable_gene
DDB_G0277823	1	3318.38	real_variable_gene
DDB_G0277843	1	75.5519	real_variable_gene
DDB_G0277845	1	19.7654	real_variable_gene
DDB_G0277887	1	19.0432	real_variable_gene
DDB_G0277891	1	18.3072	real_variable_gene
DDB_G0277949	1	24.2467	real_variable_gene
DDB_G0277963	1	6.64862	real_variable_gene
DDB_G0277965	1	1.66482	real_variable_gene
DDB_G0278047	1	149.601	real_variable_gene
DDB_G0278091	1	8.44454	real_variable_gene
DDB_G0278119	1	5.78298	real_variable_gene
DDB_G0278125	1	241.421	real_variable_gene
DDB_G0278229	1	16.2149	real_variable_gene
DDB_G0278231	1	3.73107	real_variable_gene
DDB_G0278243	1	29.6722	real_variable_gene
DDB_G0278251	1	3.75525	real_variable_gene
DDB_G0278253	1	162.654	real_variable_gene
DDB_G0278293	1	2634.37	real_variable_gene
DDB_G0278297	1	20.0517	real_variable_gene
DDB_G0278353	1	17.9385	real_variable_gene
DDB_G0278431	1	5.73181	real_variable_gene
DDB_G0278435	1	8.09915	real_variable_gene
DDB_G0278439	1	36.1759	real_variable_gene
DDB_G0278445	1	25.6116	real_variable_gene
DDB_G0278473	1	6.67058	real_variable_gene
DDB_G0278483	1	106.265	real_variable_gene
DDB_G0278531	1	14.0081	real_variable_gene
DDB_G0278537	1	7.68538	real_variable_gene
DDB_G0278545	1	23.0544	real_variable_gene
DDB_G0278551	1	20.0305	real_variable_gene
DDB_G0278613	1	81.8661	real_variable_gene
DDB_G0278639	1	44.9113	real_variable_gene
DDB_G0278645	1	3.5933	real_variable_gene
DDB_G0278661	1	60.3885	real_variable_gene
DDB_G0278665	1	31.5024	real_variable_gene
DDB_G0278671	1	30.1441	real_variable_gene
DDB_G0278755	1	67.6242	real_variable_gene
DDB_G0278797	1	5.40669	real_variable_gene
DDB_G0278851	1	19.7873	real_variable_gene
DDB_G0278875	1	66.1781	real_variable_gene
DDB_G0278953	1	22.1194	real_variable_gene
DDB_G0278975	1	12.5452	real_variable_gene
DDB_G0279107	1	35.0511	real_variable_gene
DDB_G0279113	1	1136.23	real_variable_gene
DDB_G0279137	1	51.2445	real_variable_gene
DDB_G0279163	1	43.3874	real_variable_gene
DDB_G0279185	1	67.379	real_variable_gene
DDB_G0279195	1	26.1565	real_variable_gene
DDB_G0279211	1	28.4783	real_variable_gene
DDB_G0279331	1	5.40764	real_variable_gene
DDB_G0279343	1	41.5812	real_variable_gene
DDB_G0279357	1	35.3113	real_variable_gene
DDB_G0279397	1	61.6815	real_variable_gene
DDB_G0279429	1	56.1532	real_variable_gene
DDB_G0279441	1	57.9163	real_variable_gene
DDB_G0279453	1	21.1496	real_variable_gene
DDB_G0279459	1	39.9993	real_variable_gene
DDB_G0279473	1	7.88864	real_variable_gene
DDB_G0279491	1	26.9455	real_variable_gene
DDB_G0279523	1	3.04346	real_variable_gene
DDB_G0279553	1	22.6281	real_variable_gene
DDB_G0279571	1	46.8948	real_variable_gene
DDB_G0279573	1	11.4541	real_variable_gene
DDB_G0279575	1	32.0509	real_variable_gene
DDB_G0279577	1	53.2399	real_variable_gene
DDB_G0279657	1	13.4883	real_variable_gene
DDB_G0279673	1	5.82033	real_variable_gene
DDB_G0279693	1	60.9144	real_variable_gene
DDB_G0279705	1	80.1507	real_variable_gene
DDB_G0279709	1	2.24462	real_variable_gene
DDB_G0279727	1	10.2761	real_variable_gene
DDB_G0279737	1	107.386	real_variable_gene
DDB_G0279759	1	63.7182	real_variable_gene
DDB_G0279799	1	11.2756	real_variable_gene
DDB_G0279885	1	7.39557	real_variable_gene
DDB_G0279915	1	17.0619	real_variable_gene
DDB_G0279923	1	13.6131	real_variable_gene
DDB_G0279933	1	177.211	real_variable_gene
DDB_G0279953	1	14.7455	real_variable_gene
DDB_G0279957	1	2.77176	real_variable_gene
DDB_G0279965	1	156.563	real_variable_gene
DDB_G0279969	1	44.2489	real_variable_gene
DDB_G0279971	1	55.5488	real_variable_gene
DDB_G0280007	1	28.9253	real_variable_gene
DDB_G0280039	1	287.274	real_variable_gene
DDB_G0280051	1	548.029	real_variable_gene
DDB_G0280053	1	47.5935	real_variable_gene
DDB_G0280085	1	9.00405	real_variable_gene
DDB_G0280131	1	80.9916	real_variable_gene
DDB_G0280155	1	24.1374	real_variable_gene
DDB_G0280175	1	33.724	real_variable_gene
DDB_G0280181	1	3.84501	real_variable_gene
DDB_G0280193	1	2.57849	real_variable_gene
DDB_G0280201	1	159.099	real_variable_gene
DDB_G0280205	1	88.6306	real_variable_gene
DDB_G0280223	1	199.053	real_variable_gene
DDB_G0280249	1	6.39568	real_variable_gene
DDB_G0280307	1	303.351	real_variable_gene
DDB_G0280333	1	6.41293	real_variable_gene
DDB_G0280337	1	5.83944	real_variable_gene
DDB_G0280339	1	5.1693	real_variable_gene
DDB_G0280369	1	10.0748	real_variable_gene
DDB_G0280371	1	36.5229	real_variable_gene
DDB_G0280395	1	14.7545	real_variable_gene
DDB_G0280427	1	56.9519	real_variable_gene
DDB_G0280429	1	262.983	real_variable_gene
DDB_G0280443	1	14.9306	real_variable_gene
DDB_G0280457	1	62.0068	real_variable_gene
DDB_G0280565	1	18.0341	real_variable_gene
DDB_G0280599	1	76.106	real_variable_gene
DDB_G0280635	1	5.5604	real_variable_gene
DDB_G0280643	1	1.72393	real_variable_gene
DDB_G0280685	1	9.13774	real_variable_gene
DDB_G0280705	1	34.3778	real_variable_gene
DDB_G0280707	1	7.06308	real_variable_gene
DDB_G0280721	1	5.91653	real_variable_gene
DDB_G0280725	1	195.322	real_variable_gene
DDB_G0280741	1	7.09862	real_variable_gene
DDB_G0280779	1	29.028	real_variable_gene
DDB_G0280831	1	99.3262	real_variable_gene
DDB_G0280869	1	21.4839	real_variable_gene
DDB_G0280881	1	14.1023	real_variable_gene
DDB_G0280885	1	10.3719	real_variable_gene
DDB_G0280895	1	37.9126	real_variable_gene
DDB_G0280955	1	15.6821	real_variable_gene
DDB_G0280997	1	14.469	real_variable_gene
DDB_G0281075	1	31.5019	real_variable_gene
DDB_G0281083	1	10.8521	real_variable_gene
DDB_G0281085	1	14.5802	real_variable_gene
DDB_G0281121	1	6.58474	real_variable_gene
DDB_G0281131	1	2.86654	real_variable_gene
DDB_G0281135	1	28.362	real_variable_gene
DDB_G0281203	1	14.4242	real_variable_gene
DDB_G0281391	1	61.2956	real_variable_gene
DDB_G0281427	1	49.83	real_variable_gene
DDB_G0281441	1	32.9851	real_variable_gene
DDB_G0281569	1	459.559	real_variable_gene
DDB_G0281573	1	85.2583	real_variable_gene
DDB_G0281607	1	154.793	real_variable_gene
DDB_G0281617	1	45.6724	real_variable_gene
DDB_G0281641	1	90.4881	real_variable_gene
DDB_G0281645	1	2.85579	real_variable_gene
DDB_G0281695	1	44.5473	real_variable_gene
DDB_G0281715	1	3.3603	real_variable_gene
DDB_G0281735	1	4.56331	real_variable_gene
DDB_G0281739	1	150.494	real_variable_gene
DDB_G0281751	1	18.3587	real_variable_gene
DDB_G0281777	1	142.264	real_variable_gene
DDB_G0281817	1	76.6463	real_variable_gene
DDB_G0281913	1	19292.5	real_variable_gene
DDB_G0281935	1	164.847	real_variable_gene
DDB_G0281951	1	12.4373	real_variable_gene
DDB_G0281975	1	137.44	real_variable_gene
DDB_G0282021	1	28.9124	real_variable_gene
DDB_G0282061	1	39.0924	real_variable_gene
DDB_G0282067	1	151.919	real_variable_gene
DDB_G0282075	1	54.8103	real_variable_gene
DDB_G0282103	1	134.802	real_variable_gene
DDB_G0282147	1	49.4322	real_variable_gene
DDB_G0282159	1	6.86411	real_variable_gene
DDB_G0282171	1	13.5951	real_variable_gene
DDB_G0282215	1	31.8514	real_variable_gene
DDB_G0282397	1	45.1974	real_variable_gene
DDB_G0282407	1	19.6422	real_variable_gene
DDB_G0282425	1	9.19522	real_variable_gene
DDB_G0282489	1	41.3784	real_variable_gene
DDB_G0282521	1	26.1445	real_variable_gene
DDB_G0282569	1	43.5278	real_variable_gene
DDB_G0282617	1	15.7948	real_variable_gene
DDB_G0282677	1	360.789	real_variable_gene
DDB_G0282699	1	6.93311	real_variable_gene
DDB_G0282701	1	33.9988	real_variable_gene
DDB_G0282715	1	32.8586	real_variable_gene
DDB_G0282725	1	125.028	real_variable_gene
DDB_G0282727	1	5.3177	real_variable_gene
DDB_G0282759	1	57.5077	real_variable_gene
DDB_G0282769	1	15.8342	real_variable_gene
DDB_G0282771	1	9.86449	real_variable_gene
DDB_G0282787	1	48.4049	real_variable_gene
DDB_G0282815	1	161.859	real_variable_gene
DDB_G0282823	1	78.2307	real_variable_gene
DDB_G0282827	1	6.65157	real_variable_gene
DDB_G0282833	1	52.9521	real_variable_gene
DDB_G0282841	1	8.33721	real_variable_gene
DDB_G0282849	1	83.5251	real_variable_gene
DDB_G0282861	1	35.776	real_variable_gene
DDB_G0282873	1	315.327	real_variable_gene
DDB_G0282931	1	23.1371	real_variable_gene
DDB_G0283009	1	72.3169	real_variable_gene
DDB_G0283023	1	47.4864	real_variable_gene
DDB_G0283033	1	81.5358	real_variable_gene
DDB_G0283073	1	23.6166	real_variable_gene
DDB_G0283081	1	92.3854	real_variable_gene
DDB_G0283093	1	26.8157	real_variable_gene
DDB_G0283143	1	8.19159	real_variable_gene
DDB_G0283145	1	88.1331	real_variable_gene
DDB_G0283189	1	15.5069	real_variable_gene
DDB_G0283279	1	19.2187	real_variable_gene
DDB_G0283281	1	9.37288	real_variable_gene
DDB_G0283291	1	33.9769	real_variable_gene
DDB_G0283305	1	39.9164	real_variable_gene
DDB_G0283337	1	20.4801	real_variable_gene
DDB_G0283339	1	132.967	real_variable_gene
DDB_G0283355	1	222.369	real_variable_gene
DDB_G0283359	1	99.5639	real_variable_gene
DDB_G0283467	1	7.14025	real_variable_gene
DDB_G0283485	1	4.9079	real_variable_gene
DDB_G0283551	1	0.89547	real_variable_gene
DDB_G0283555	1	36.3571	real_variable_gene
DDB_G0283565	1	73.5338	real_variable_gene
DDB_G0283599	1	1.9694	real_variable_gene
DDB_G0283615	1	140.417	real_variable_gene
DDB_G0283651	1	16.9813	real_variable_gene
DDB_G0283653	1	39.0062	real_variable_gene
DDB_G0283675	1	3.25094	real_variable_gene
DDB_G0283681	1	8.53675	real_variable_gene
DDB_G0283699	1	18.5051	real_variable_gene
DDB_G0283809	1	292.363	real_variable_gene
DDB_G0283821	1	135.574	real_variable_gene
DDB_G0283833	1	24.8153	real_variable_gene
DDB_G0283901	1	19.8282	real_variable_gene
DDB_G0283909	1	4.04757	real_variable_gene
DDB_G0283911	1	58.3433	real_variable_gene
DDB_G0283913	1	31.1356	real_variable_gene
DDB_G0283943	1	66.4492	real_variable_gene
DDB_G0283949	1	32.5544	real_variable_gene
DDB_G0283953	1	36.7359	real_variable_gene
DDB_G0283957	1	67.5983	real_variable_gene
DDB_G0283971	1	104.23	real_variable_gene
DDB_G0283981	1	23.6513	real_variable_gene
DDB_G0284015	1	70.903	real_variable_gene
DDB_G0284025	1	9.94275	real_variable_gene
DDB_G0284141	1	34.6565	real_variable_gene
DDB_G0284187	1	35.0764	real_variable_gene
DDB_G0284195	1	113.96	real_variable_gene
DDB_G0284257	1	58.4662	real_variable_gene
DDB_G0284263	1	130.375	real_variable_gene
DDB_G0284277	1	380.955	real_variable_gene
DDB_G0284331	1	25.783	real_variable_gene
DDB_G0284343	1	25.3305	real_variable_gene
DDB_G0284353	1	119.669	real_variable_gene
DDB_G0284357	1	811.321	real_variable_gene
DDB_G0284375	1	19.6537	real_variable_gene
DDB_G0284379	1	87.4624	real_variable_gene
DDB_G0284393	1	18.5228	real_variable_gene
DDB_G0284397	1	5.99073	real_variable_gene
DDB_G0284441	1	2.94601	real_variable_gene
DDB_G0284445	1	1.47674	real_variable_gene
DDB_G0284461	1	34.9996	real_variable_gene
DDB_G0284471	1	49.028	real_variable_gene
DDB_G0284499	1	25.4152	real_variable_gene
DDB_G0284529	1	6.34508	real_variable_gene
DDB_G0284537	1	33.265	real_variable_gene
DDB_G0284565	1	17.3376	real_variable_gene
DDB_G0284575	1	107.039	real_variable_gene
DDB_G0284613	1	7.1033	real_variable_gene
DDB_G0284655	1	23.507	real_variable_gene
DDB_G0284683	1	36.1675	real_variable_gene
DDB_G0284699	1	519.938	real_variable_gene
DDB_G0284701	1	24.2471	real_variable_gene
DDB_G0284739	1	10.2207	real_variable_gene
DDB_G0284741	1	40.3989	real_variable_gene
DDB_G0284745	1	104.752	real_variable_gene
DDB_G0284747	1	21.3503	real_variable_gene
DDB_G0284763	1	113.709	real_variable_gene
DDB_G0284779	1	20.1743	real_variable_gene
DDB_G0284791	1	13.5246	real_variable_gene
DDB_G0284807	1	13.8188	real_variable_gene
DDB_G0284825	1	177.013	real_variable_gene
DDB_G0284833	1	21.899	real_variable_gene
DDB_G0284867	1	164.529	real_variable_gene
DDB_G0284897	1	48.23	real_variable_gene
DDB_G0284917	1	924.164	real_variable_gene
DDB_G0284953	1	135.18	real_variable_gene
DDB_G0284975	1	175.915	real_variable_gene
DDB_G0284977	1	65.986	real_variable_gene
DDB_G0284987	1	123.096	real_variable_gene
DDB_G0284999	1	17.9264	real_variable_gene
DDB_G0285005	1	14.9709	real_variable_gene
DDB_G0285055	1	29.2587	real_variable_gene
DDB_G0285143	1	61.82	real_variable_gene
DDB_G0285161	1	13.9694	real_variable_gene
DDB_G0285177	1	14.6613	real_variable_gene
DDB_G0285215	1	9.54222	real_variable_gene
DDB_G0285245	1	12.69	real_variable_gene
DDB_G0285263	1	17.067	real_variable_gene
DDB_G0285275	1	12.1685	real_variable_gene
DDB_G0285283	1	36.9176	real_variable_gene
DDB_G0285289	1	13.5669	real_variable_gene
DDB_G0285299	1	1.68694	real_variable_gene
DDB_G0285329	1	24.2945	real_variable_gene
DDB_G0285333	1	48.7183	real_variable_gene
DDB_G0285349	1	3.09191	real_variable_gene
DDB_G0285381	1	40.3814	real_variable_gene
DDB_G0285391	1	245.826	real_variable_gene
DDB_G0285419	1	131.995	real_variable_gene
DDB_G0285431	1	6.64566	real_variable_gene
DDB_G0285445	1	9.96017	real_variable_gene
DDB_G0285485	1	155.078	real_variable_gene
DDB_G0285501	1	155.38	real_variable_gene
DDB_G0285585	1	13.2052	real_variable_gene
DDB_G0285605	1	67.5086	real_variable_gene
DDB_G0285631	1	6.34568	real_variable_gene
DDB_G0285637	1	6.79028	real_variable_gene
DDB_G0285649	1	169.922	real_variable_gene
DDB_G0285663	1	193.475	real_variable_gene
DDB_G0285689	1	19.8988	real_variable_gene
DDB_G0285745	1	3.52459	real_variable_gene
DDB_G0285773	1	14.9588	real_variable_gene
DDB_G0285775	1	4.06184	real_variable_gene
DDB_G0285817	1	20.3336	real_variable_gene
DDB_G0285837	1	16.3101	real_variable_gene
DDB_G0285843	1	6.21261	real_variable_gene
DDB_G0285853	1	7.05399	real_variable_gene
DDB_G0285895	1	5.63155	real_variable_gene
DDB_G0285915	1	26.9372	real_variable_gene
DDB_G0285923	1	928.884	real_variable_gene
DDB_G0285931	1	77.496	real_variable_gene
DDB_G0285983	1	126.844	real_variable_gene
DDB_G0285995	1	294.081	real_variable_gene
DDB_G0286013	1	102.272	real_variable_gene
DDB_G0286015	1	11.6939	real_variable_gene
DDB_G0286039	1	68.8293	real_variable_gene
DDB_G0286053	1	10.6118	real_variable_gene
DDB_G0286059	1	2975.76	real_variable_gene
DDB_G0286061	1	48.7815	real_variable_gene
DDB_G0286127	1	15.9836	real_variable_gene
DDB_G0286163	1	90.4807	real_variable_gene
DDB_G0286175	1	2.96247	real_variable_gene
DDB_G0286199	1	50.1717	real_variable_gene
DDB_G0286351	1	26.5627	real_variable_gene
DDB_G0286387	1	42.3255	real_variable_gene
DDB_G0286403	1	14.4385	real_variable_gene
DDB_G0286411	1	43.1235	real_variable_gene
DDB_G0286417	1	15.2197	real_variable_gene
DDB_G0286419	1	6.81946	real_variable_gene
DDB_G0286459	1	51.3085	real_variable_gene
DDB_G0286499	1	16.4448	real_variable_gene
DDB_G0286507	1	126.067	real_variable_gene
DDB_G0286537	1	36.3055	real_variable_gene
DDB_G0286559	1	35.7734	real_variable_gene
DDB_G0286601	1	40.9744	real_variable_gene
DDB_G0286609	1	21.0088	real_variable_gene
DDB_G0286613	1	263.119	real_variable_gene
DDB_G0286619	1	12.4188	real_variable_gene
DDB_G0286625	1	28.2777	real_variable_gene
DDB_G0286631	1	8.84336	real_variable_gene
DDB_G0286637	1	150.953	real_variable_gene
DDB_G0286647	1	0.954573	real_variable_gene
DDB_G0286649	1	43.1611	real_variable_gene
DDB_G0286681	1	74.276	real_variable_gene
DDB_G0286715	1	101.303	real_variable_gene
DDB_G0286717	1	170.711	real_variable_gene
DDB_G0286721	1	443.572	real_variable_gene
DDB_G0286723	1	565.697	real_variable_gene
DDB_G0286803	1	105.875	real_variable_gene
DDB_G0286817	1	53.8436	real_variable_gene
DDB_G0286827	1	14.0336	real_variable_gene
DDB_G0286833	1	39.1729	real_variable_gene
DDB_G0286843	1	25.9656	real_variable_gene
DDB_G0286849	1	76.5596	real_variable_gene
DDB_G0286851	1	2.9759	real_variable_gene
DDB_G0286897	1	36.8307	real_variable_gene
DDB_G0286905	1	6.658	real_variable_gene
DDB_G0286919	1	170.182	real_variable_gene
DDB_G0286923	1	60.6209	real_variable_gene
DDB_G0286967	1	20.693	real_variable_gene
DDB_G0286973	1	11.9567	real_variable_gene
DDB_G0286977	1	12.9199	real_variable_gene
DDB_G0286979	1	10.941	real_variable_gene
DDB_G0286983	1	126.018	real_variable_gene
DDB_G0287001	1	17.1686	real_variable_gene
DDB_G0287009	1	36.8961	real_variable_gene
DDB_G0287087	1	20.0126	real_variable_gene
DDB_G0287109	1	46.914	real_variable_gene
DDB_G0287119	1	7.28021	real_variable_gene
DDB_G0287255	1	214.93	real_variable_gene
DDB_G0287259	1	80.4262	real_variable_gene
DDB_G0287261	1	32.4787	real_variable_gene
DDB_G0287271	1	16.6821	real_variable_gene
DDB_G0287281	1	4.65144	real_variable_gene
DDB_G0287295	1	11.2716	real_variable_gene
DDB_G0287303	1	13.7143	real_variable_gene
DDB_G0287327	1	124.95	real_variable_gene
DDB_G0287357	1	82.0407	real_variable_gene
DDB_G0287365	1	15.9645	real_variable_gene
DDB_G0287393	1	18.0933	real_variable_gene
DDB_G0287403	1	91.7861	real_variable_gene
DDB_G0287423	1	23.3041	real_variable_gene
DDB_G0287431	1	2.60914	real_variable_gene
DDB_G0287453	1	2.49176	real_variable_gene
DDB_G0287459	1	243.739	real_variable_gene
DDB_G0287471	1	43.3949	real_variable_gene
DDB_G0287477	1	23.0372	real_variable_gene
DDB_G0287491	1	195.603	real_variable_gene
DDB_G0287519	1	1418.14	real_variable_gene
DDB_G0287529	1	15.1906	real_variable_gene
DDB_G0287549	1	3.5818	real_variable_gene
DDB_G0287561	1	3.97913	real_variable_gene
DDB_G0287563	1	4.10587	real_variable_gene
DDB_G0287569	1	41.207	real_variable_gene
DDB_G0287593	1	77.9954	real_variable_gene
DDB_G0287625	1	264.696	real_variable_gene
DDB_G0287631	1	53.0681	real_variable_gene
DDB_G0287647	1	73.4916	real_variable_gene
DDB_G0287649	1	129.499	real_variable_gene
DDB_G0287657	1	132.239	real_variable_gene
DDB_G0287677	1	6.24974	real_variable_gene
DDB_G0287679	1	80.7718	real_variable_gene
DDB_G0287685	1	1515.02	real_variable_gene
DDB_G0287687	1	36.8704	real_variable_gene
DDB_G0287703	1	9.39433	real_variable_gene
DDB_G0287705	1	11.3713	real_variable_gene
DDB_G0287765	1	18.5016	real_variable_gene
DDB_G0287801	1	67.0574	real_variable_gene
DDB_G0287807	1	46.6706	real_variable_gene
DDB_G0287841	1	133.641	real_variable_gene
DDB_G0287873	1	3.41491	real_variable_gene
DDB_G0287933	1	53.9659	real_variable_gene
DDB_G0287935	1	138.344	real_variable_gene
DDB_G0287943	1	5.20237	real_variable_gene
DDB_G0287961	1	13.0875	real_variable_gene
DDB_G0287971	1	6.34074	real_variable_gene
DDB_G0288003	1	3.16438	real_variable_gene
DDB_G0288007	1	110.696	real_variable_gene
DDB_G0288013	1	68.1436	real_variable_gene
DDB_G0288019	1	204.05	real_variable_gene
DDB_G0288055	1	199.023	real_variable_gene
DDB_G0288191	1	3.90137	real_variable_gene
DDB_G0288197	1	25.9794	real_variable_gene
DDB_G0288219	1	57.5537	real_variable_gene
DDB_G0288223	1	6.69941	real_variable_gene
DDB_G0288239	1	364.762	real_variable_gene
DDB_G0288249	1	14.8118	real_variable_gene
DDB_G0288253	1	38.3048	real_variable_gene
DDB_G0288255	1	51.6534	real_variable_gene
DDB_G0288257	1	395.773	real_variable_gene
DDB_G0288267	1	3916.92	real_variable_gene
DDB_G0288269	1	19.0918	real_variable_gene
DDB_G0288285	1	158.936	real_variable_gene
DDB_G0288307	1	17.4272	real_variable_gene
DDB_G0288377	1	41.139	real_variable_gene
DDB_G0288401	1	79.27	real_variable_gene
DDB_G0288453	1	40.9762	real_variable_gene
DDB_G0288459	1	30.4951	real_variable_gene
DDB_G0288533	1	6.98126	real_variable_gene
DDB_G0288541	1	306.021	real_variable_gene
DDB_G0288557	1	104.175	real_variable_gene
DDB_G0288609	1	98.6573	real_variable_gene
DDB_G0288647	1	185.852	real_variable_gene
DDB_G0288709	1	8.16589	real_variable_gene
DDB_G0288777	1	22.125	real_variable_gene
DDB_G0288781	1	351.432	real_variable_gene
DDB_G0288793	1	6.67646	real_variable_gene
DDB_G0288819	1	5.28727	real_variable_gene
DDB_G0288873	1	25.6256	real_variable_gene
DDB_G0288877	1	31.3844	real_variable_gene
DDB_G0288919	1	23.8613	real_variable_gene
DDB_G0288945	1	12.4902	real_variable_gene
DDB_G0288953	1	81.3414	real_variable_gene
DDB_G0288987	1	48.0702	real_variable_gene
DDB_G0288993	1	85.2428	real_variable_gene
DDB_G0289015	1	108.639	real_variable_gene
DDB_G0289033	1	83.1497	real_variable_gene
DDB_G0289053	1	56.5961	real_variable_gene
DDB_G0289073	1	29.815	real_variable_gene
DDB_G0289077	1	17.1138	real_variable_gene
DDB_G0289097	1	2.95737	real_variable_gene
DDB_G0289129	1	75.335	real_variable_gene
DDB_G0289145	1	8.639	real_variable_gene
DDB_G0289147	1	40.2665	real_variable_gene
DDB_G0289183	1	22.052	real_variable_gene
DDB_G0289225	1	7.19766	real_variable_gene
DDB_G0289237	1	93.6911	real_variable_gene
DDB_G0289253	1	6.06952	real_variable_gene
DDB_G0289263	1	13.4079	real_variable_gene
DDB_G0289273	1	24.4881	real_variable_gene
DDB_G0289275	1	12.3306	real_variable_gene
DDB_G0289283	1	15.5283	real_variable_gene
DDB_G0289303	1	8.16226	real_variable_gene
DDB_G0289309	1	11.5712	real_variable_gene
DDB_G0289335	1	4.75555	real_variable_gene
DDB_G0289367	1	3.71056	real_variable_gene
DDB_G0289411	1	20.1027	real_variable_gene
DDB_G0289419	1	0.976716	real_variable_gene
DDB_G0289467	1	520.008	real_variable_gene
DDB_G0289471	1	214.126	real_variable_gene
DDB_G0289473	1	217.655	real_variable_gene
DDB_G0289517	1	5.03915	real_variable_gene
DDB_G0289519	1	3.45996	real_variable_gene
DDB_G0289541	1	133.489	real_variable_gene
DDB_G0289551	1	60.0365	real_variable_gene
DDB_G0289553	1	12.403	real_variable_gene
DDB_G0289585	1	24.1815	real_variable_gene
DDB_G0289595	1	88.9617	real_variable_gene
DDB_G0289601	1	58.8007	real_variable_gene
DDB_G0289627	1	46.4052	real_variable_gene
DDB_G0289689	1	13.1059	real_variable_gene
DDB_G0289731	1	3.8124	real_variable_gene
DDB_G0289779	1	4.69285	real_variable_gene
DDB_G0289787	1	16.7151	real_variable_gene
DDB_G0289839	1	2.08089	real_variable_gene
DDB_G0289863	1	23.2088	real_variable_gene
DDB_G0289883	1	24.5965	real_variable_gene
DDB_G0289907	1	50.9378	real_variable_gene
DDB_G0289933	1	10.3291	real_variable_gene
DDB_G0289967	1	17.5564	real_variable_gene
DDB_G0289979	1	148.483	real_variable_gene
DDB_G0290023	1	9.26685	real_variable_gene
DDB_G0290037	1	4.91388	real_variable_gene
DDB_G0290061	1	7.97276	real_variable_gene
DDB_G0290071	1	56.4253	real_variable_gene
DDB_G0290153	1	15.7726	real_variable_gene
DDB_G0290225	1	23.6531	real_variable_gene
DDB_G0290231	1	105.969	real_variable_gene
DDB_G0290253	1	250.242	real_variable_gene
DDB_G0290279	1	56.6842	real_variable_gene
DDB_G0290293	1	154.445	real_variable_gene
DDB_G0290301	1	39.0507	real_variable_gene
DDB_G0290317	1	75.8892	real_variable_gene
DDB_G0290325	1	8.90797	real_variable_gene
DDB_G0290359	1	81.2369	real_variable_gene
DDB_G0290367	1	22.9877	real_variable_gene
DDB_G0290377	1	60.2265	real_variable_gene
DDB_G0290389	1	577.845	real_variable_gene
DDB_G0290411	1	51.0488	real_variable_gene
DDB_G0290529	1	60.4627	real_variable_gene
DDB_G0290569	1	7.0802	real_variable_gene
DDB_G0290619	1	13.2658	real_variable_gene
DDB_G0290695	1	7.4597	real_variable_gene
DDB_G0290781	1	25.4547	real_variable_gene
DDB_G0290825	1	38.9122	real_variable_gene
DDB_G0290835	1	22.0045	real_variable_gene
DDB_G0290877	1	13.1046	real_variable_gene
DDB_G0290919	1	47.7657	real_variable_gene
DDB_G0290925	1	8.25004	real_variable_gene
DDB_G0290931	1	39.8921	real_variable_gene
DDB_G0290963	1	297.776	real_variable_gene
DDB_G0290967	1	47.4638	real_variable_gene
DDB_G0290993	1	26.6274	real_variable_gene
DDB_G0291011	1	71.937	real_variable_gene
DDB_G0291027	1	11.4972	real_variable_gene
DDB_G0291033	1	1.20317	real_variable_gene
DDB_G0291039	1	103.807	real_variable_gene
DDB_G0291053	1	10.9525	real_variable_gene
DDB_G0291071	1	18.9383	real_variable_gene
DDB_G0291075	1	6.35175	real_variable_gene
DDB_G0291105	1	17.0189	real_variable_gene
DDB_G0291115	1	43.497	real_variable_gene
DDB_G0291123	1	40.353	real_variable_gene
DDB_G0291125	1	531.375	real_variable_gene
DDB_G0291153	1	7.92963	real_variable_gene
DDB_G0291183	1	62.3408	real_variable_gene
DDB_G0291185	1	170.571	real_variable_gene
DDB_G0291201	1	29.3008	real_variable_gene
DDB_G0291227	1	51.3224	real_variable_gene
DDB_G0291245	1	48.1877	real_variable_gene
DDB_G0291249	1	16.0269	real_variable_gene
DDB_G0291267	1	28.7579	real_variable_gene
DDB_G0291299	1	135.77	real_variable_gene
DDB_G0291312	1	156.368	real_variable_gene
DDB_G0291354	1	7.03494	real_variable_gene
DDB_G0291356	1	121.082	real_variable_gene
DDB_G0291360	1	39.9011	real_variable_gene
DDB_G0291380	1	50.1716	real_variable_gene
DDB_G0291392	1	59.694	real_variable_gene
DDB_G0291432	1	15.2162	real_variable_gene
DDB_G0291454	1	1.71384	real_variable_gene
DDB_G0291492	1	11.4991	real_variable_gene
DDB_G0291514	1	3.31507	real_variable_gene
DDB_G0291524	1	8.69311	real_variable_gene
DDB_G0291594	1	35.8429	real_variable_gene
DDB_G0291646	1	9.92873	real_variable_gene
DDB_G0291654	1	23.2171	real_variable_gene
DDB_G0291674	1	32.3084	real_variable_gene
DDB_G0291676	1	163.141	real_variable_gene
DDB_G0291716	1	1.65727	real_variable_gene
DDB_G0291740	1	44.9332	real_variable_gene
DDB_G0291770	1	70.9194	real_variable_gene
DDB_G0291806	1	6.34316	real_variable_gene
DDB_G0291838	1	93.5224	real_variable_gene
DDB_G0291842	1	30.4377	real_variable_gene
DDB_G0291844	1	4.20924	real_variable_gene
DDB_G0291996	1	45.1163	real_variable_gene
DDB_G0291998	1	9.87293	real_variable_gene
DDB_G0292014	1	5.75413	real_variable_gene
DDB_G0292042	1	55.1975	real_variable_gene
DDB_G0292068	1	143.321	real_variable_gene
DDB_G0292102	1	21.9159	real_variable_gene
DDB_G0292108	1	17.48	real_variable_gene
DDB_G0292132	1	33.2597	real_variable_gene
DDB_G0292134	1	58.8218	real_variable_gene
DDB_G0292178	1	0.764021	real_variable_gene
DDB_G0292188	1	227.898	real_variable_gene
DDB_G0292248	1	21.4807	real_variable_gene
DDB_G0292288	1	83.5005	real_variable_gene
DDB_G0292302	1	118.484	real_variable_gene
DDB_G0292312	1	78.3214	real_variable_gene
DDB_G0292366	1	43.1081	real_variable_gene
DDB_G0292380	1	39.5542	real_variable_gene
DDB_G0292392	1	49.9835	real_variable_gene
DDB_G0292436	1	8.49769	real_variable_gene
DDB_G0292442	1	41.4055	real_variable_gene
DDB_G0292506	1	7.25396	real_variable_gene
DDB_G0292540	1	1.79076	real_variable_gene
DDB_G0292554	1	125.49	real_variable_gene
DDB_G0292618	1	13.6146	real_variable_gene
DDB_G0292696	1	4.21218	real_variable_gene
DDB_G0292768	1	66.0514	real_variable_gene
DDB_G0292780	1	51.0247	real_variable_gene
DDB_G0292788	1	36.7968	real_variable_gene
DDB_G0292794	1	61.9141	real_variable_gene
DDB_G0292814	1	29.507	real_variable_gene
DDB_G0292830	1	5.70439	real_variable_gene
DDB_G0292844	1	9.26429	real_variable_gene
DDB_G0292848	1	59.5677	real_variable_gene
DDB_G0292860	1	151.192	real_variable_gene
DDB_G0292870	1	35.6054	real_variable_gene
DDB_G0292894	1	62.6889	real_variable_gene
DDB_G0292918	1	304.209	real_variable_gene
DDB_G0292958	1	69.1545	real_variable_gene
DDB_G0292966	1	6.22917	real_variable_gene
DDB_G0292968	1	24.9557	real_variable_gene
DDB_G0292988	1	58.9551	real_variable_gene
DDB_G0293030	1	143.924	real_variable_gene
DDB_G0293032	1	262.421	real_variable_gene
DDB_G0293046	1	9.6283	real_variable_gene
DDB_G0293066	1	47.8293	real_variable_gene
DDB_G0293070	1	1605.11	real_variable_gene
DDB_G0293072	1	235.129	real_variable_gene
DDB_G0293082	1	4.66474	real_variable_gene
DDB_G0293124	1	31.1628	real_variable_gene
DDB_G0293158	1	2.37608	real_variable_gene
DDB_G0293168	1	266.182	real_variable_gene
DDB_G0293196	1	122.456	real_variable_gene
DDB_G0293202	1	435.722	real_variable_gene
DDB_G0293234	1	95.3185	real_variable_gene
DDB_G0293274	1	95.8174	real_variable_gene
DDB_G0293276	1	46.6912	real_variable_gene
[truncated: 20,265 more rows]
