# Supplementary figures and images for: Linage priming and cell type proportioning depends on the interplay between stochastic and deterministic factors
Source: eLife journal article supplement (doi:10.7554/elife.105512), 2025-05-30

AX4 set1<sup>-</sup> ash2<sup>-</sup>

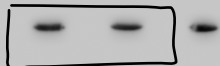

Supplement: fig5-data1 [file ax4_Set1_ash2_actin_10_secs.pdf › Figure 5 -source data 1/ax4_Set1_ash2_actin_10_secs.pdf]

AX9 setl<sup>-</sup> ash2<sup>-</sup>

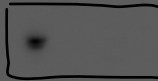

Supplement: fig5-data1 [file ax4_Set1_ash2_me1_10_secs.pdf › Figure 5 -source data 1/ax4_Set1_ash2_me1_10_secs.pdf]

AX4 set1- ash 2-

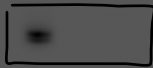

Supplement: fig5-data1 [file ax4_Set1_ash2_me2_10_secs.pdf › Figure 5 -source data 1/ax4_Set1_ash2_me2_10_secs.pdf]

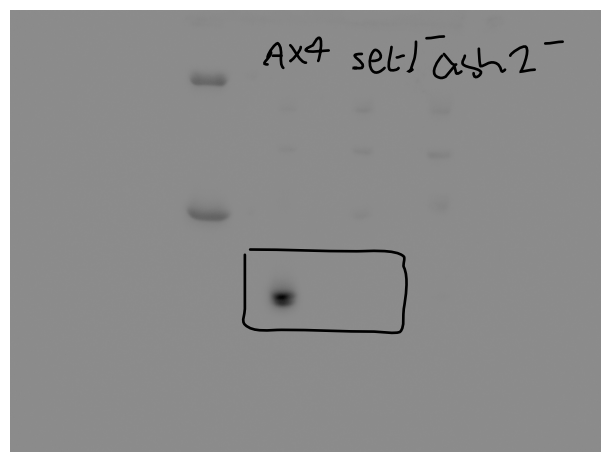

Supplement: fig5-data1 [file ax4_Set1_ash2_me3_10_secs.pdf › Figure 5 -source data 1/ax4_Set1_ash2_me3_10_secs.pdf]

AX4 *casH*<sup>-</sup> *scd1*<sup>-</sup>

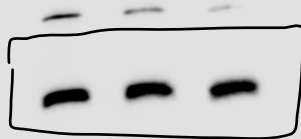

Supplement: fig6-data1 [file H3_hrp_30_secs.pdf › Figure 6 - source data 1/H3_hrp_30_secs.pdf]

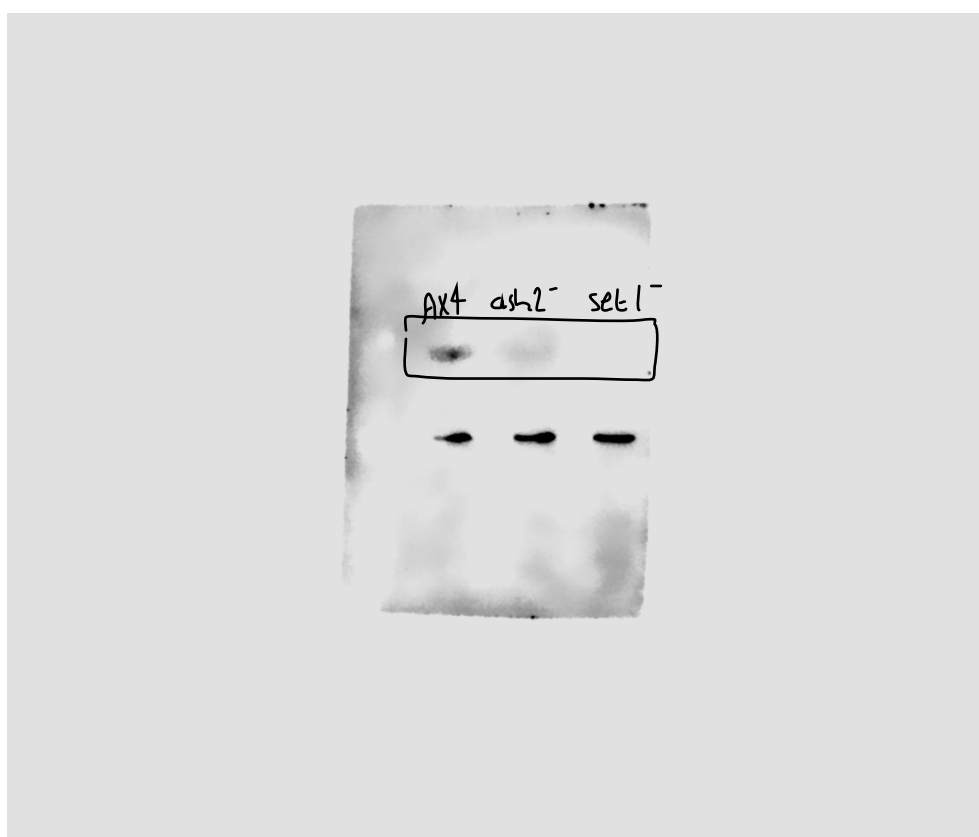

Supplement: fig6-data1 [file me1_hrp_5_mins.pdf › Figure 6 - source data 1/me1_hrp_5_mins.pdf]

AX4 ash2 sek1

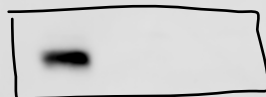

Supplement: fig6-data1 [file me2_hrp_5_mins.pdf › Figure 6 - source data 1/me2_hrp_5_mins.pdf]

A<sub>4</sub> ash2 set 1

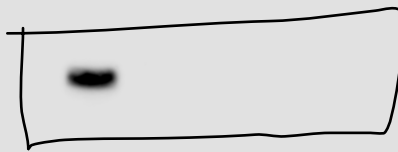

Supplement: fig6-data1 [file me3_hrp_30_secs.pdf › Figure 6 - source data 1/me3_hrp_30_secs.pdf]

Ax4 set1 set1 flag

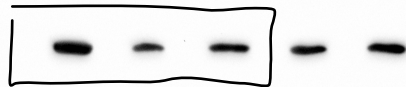

Supplement: fig6-figsupp3-data1 [file Actin_FLAG_invert.pdf › Figure 6 - source data 3/Actin_FLAG_invert.pdf]

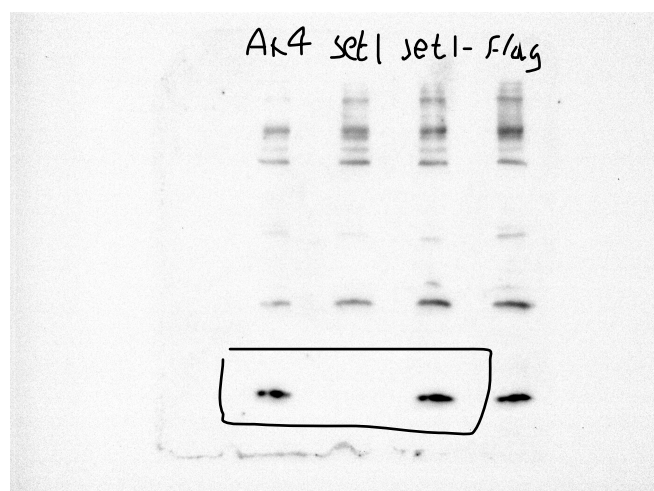

Supplement: fig6-figsupp3-data1 [file Me1_FLAG_invert.pdf › Figure 6 - source data 3/Me1_FLAG_invert.pdf]

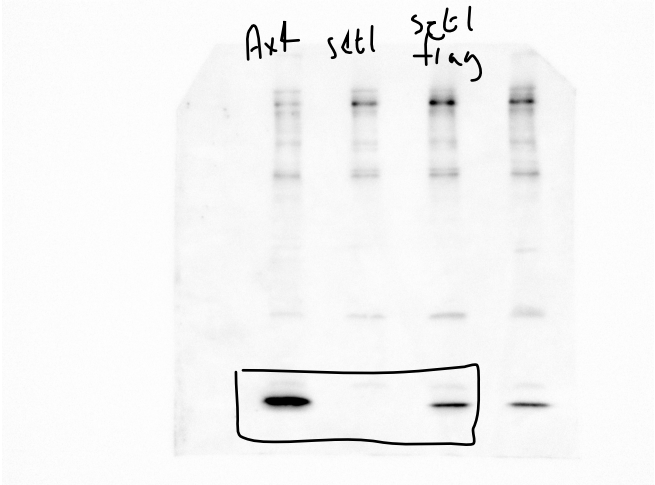

Supplement: fig6-figsupp3-data1 [file Me2_FLAG_invert.pdf › Figure 6 - source data 3/Me2_FLAG_invert.pdf]

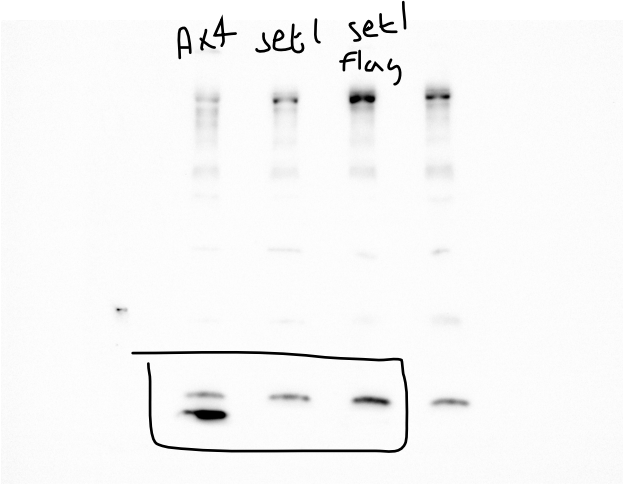

Supplement: fig6-figsupp3-data1 [file Me3_FLAG_invert.pdf › Figure 6 - source data 3/Me3_FLAG_invert.pdf]
